# Supplementary material
Source: Research Square preprint supplement (doi:10.21203/rs.3.rs-10235383/v1)
Supplement: Supplementary file 1 [file 686209107fa56d3c68ee91ce.docx]

**Supplementary Material 1**

**Supplementary Material 1 Content**

[**Additional file: Methods 1**](#_Toc233407367)

[**Additional file: Tables 8**](#_Toc233407376)

[Table S1. Number of participants included in each analysis set 8](#_Toc233407377)

[Table S2. Protocol deviations and violations 9](#_Toc233407378)

[Table S3. The incidence of adverse events after two doses of vaccination 10](#_Toc233407379)

[Table S4. Vaccine-related adverse events and severity. 33](#_Toc233407380)

[Table S5. Serious Adverse Events 43](#_Toc233407381)

[Table S6. Severity of overall adverse events within 30 days after vaccination 54](#_Toc233407382)

[Table S7. Changes in anti-Fc and anti-nuclear antibody levels 30 days after full vaccination 82](#_Toc233407383)

[Table S8. Anti-gE antibody response at baseline characteristics, day 30 after first vaccination, day 30 after full vaccination and month 6, 12, and 24 after full vaccination (FAS Set) 83](#_Toc233407384)

[Table S9. Anti-VZV antibody response at baseline characteristics, day 30 after first vaccination, day 30 after full vaccination and month 6, 12, and 24 after full vaccination (FAS Set) 86](#_Toc233407385)

[Table S10. Seropositivity and seroconversion rates of anti-gE and anti-VZV antibodies in different analysis sets 89](#_Toc233407386)

[Table S11. GMC or GMT, and GMFR of anti-gE and anti-VZV antibodies in different analysis sets 92](#_Toc233407387)

[CONSORT2025 checklist of information to include when reporting a randomized trial* 94](#_Toc233407388)

# Additional file: Methods

## Specific screening visit contents

Major medical history is defined as conditions that require emergency care, hospitalization, and/or surgery; physical examination, including height, weight, axillary temperature, blood pressure, involving cardiac and pulmonary auscultation, and skin examination; blood sample tests, anti-gE antibody, anti-VZV antibody, anti-Fc antibody, anti-nuclear antibody, among others; and urinary screen for a pregnancy test done in women of childbearing potential etc.

## Inclusion and exclusion criteria

The volunteers had to meet all following inclusion and exclusion criteria to be eligible for the study

**Inclusion Criteria**

1. Aged 50 to 70 years on the day of enrollment, regardless of gender, and able to provide legal proof of identity.
2. Capable of understanding the study procedures, voluntarily agreeing to participate in the study, and signing the Informed Consent Form (ICF).
3. Female participants are neither pregnant nor breastfeeding.
4. All participants with reproductive potential (including participants' partners) must use effective contraception from the screening visit until 6 months after the completion of the full vaccination schedule.
5. Able to attend all scheduled follow-up visits and comply with the protocol requirements.
6. Axillary temperature is ≤37.0℃ at enrollment.

**Exclusion Criteria**

**1. Exclusion Criteria for the First Dose Administration**

1. History or family history of convulsion, epilepsy, encephalopathy and psychosis, etc.
2. Received immunomodulatory therapy within 3 months prior to vaccination (e.g., long-term systemic corticosteroid use ≥14days, dose ≥2mg/kg/day or≥20 mg/day of prednisone or equivalent dose of prednisone).
3. History of severe allergies to any previous vaccination; known allergy to any component of the study vaccine, such as polysorbate; or those with an allergic constitution (atopic diathesis).
4. Compromised immune function or diagnosed with congenital or acquired immunodeficiency diseases, or Human Immunodeficiency Virus (HIV) infection.
5. History of varicella or herpes zoster vaccine administration.
6. Suffered from herpes zoster within the last 10 years.
7. Received non-live vaccines within 14 days, or any live vaccines within 28 days prior to vaccination.
8. Used blood products or immunoglobulin within 1 month prior to vaccination, or planned use within 1 month after the completion of the full vaccination schedule.
9. Suffering from an acute illness or in the acute exacerbation phase of a chronic disease within 3 days prior to vaccination.
10. Suffering from infectious skin diseases.
11. History of thrombocytopenia or other coagulation disorders that may contraindicate intramuscular injection.
12. History of cardiovascular events, such as myocardial infarction (occurring within 6 months prior to signing the ICF), cardio cerebral syndrome, severe arrhythmia, unstable angina, uncontrolled arrhythmia, or poorly controlled hypertension.
13. Asplenia or functional asplenia, as well as asplenia or splenectomy due to any condition.
14. Currently participating in another clinical study involving an investigational or unregistered product (drug, vaccine, or device, etc.), or planning to participate in another clinical study before the end of the current one.
15. Any condition that the investigator believes may affect the participant's safety or influence the trial assessment (e.g., medical factors such as extensive psoriasis, unexplained rash, eczema, chronic pain syndromes; or social factors such as planned relocation away from the local area before the end of the study).

**2. Deferral Criteria for the Second Dose Administration**

Vaccination should be deferred until the condition resolves if any of the following occur. Deferral should be done, if possible, within the specified time window (refer to the "Study Schedule").

1. Axillary temperature >37.0℃ at the visit.
2. Acute illness or acute exacerbation phase of a chronic disease (within 3 days prior to vaccination).
3. Insufficient interval since the administration of other vaccines (received non-live vaccines within 14 days, or any live vaccines within 28 days prior to vaccination).
4. Other circumstances that the investigator deems necessary to defer the vaccination.
5. Exclusion Criteria for the Second Dose Administration

**3. Exclusion Criteria for the Second Dose Administration**

The second dose administration should be terminated if any of the following occur:

1. New onset or discovery of a condition that meets the first dose Exclusion Criteria (except for items 5, 6, 7, 9, 10, and 13).
2. Experienced a vaccine-related adverse reaction after the first dose, which the investigator assesses as rendering the participant unsuitable for further vaccination.
3. Any other reason that the investigator assesses requires termination of the study vaccine administration.

## Schedule of visit

| **Study Period** | **Intervention** | | | | | | | | | **Notes** |
| --- | --- | --- | --- | --- | --- | --- | --- | --- | --- | --- |
| **Visit Number**  **Scheduled Time** | **Screening Period** | **V2** | **V3** | **V4** | **V5** | **V6** | **V7** | **V8** | **V9** |
| D0 | D8 | D30 | D38 | **30 days after full vaccination** | **6 months after full vaccination** | **12 months after full vaccination** | **24 months after full vaccination** | **36 months after full vaccination** |
| **Visit Window** | / | / | +7 days | / | -2~+7 days | +15 days | ±1 month | ±1 month | ±1 month |  |
| **Administrative Procedures** | | | | | | | | | | |
| Informed Consent | **X** |  |  |  |  |  |  |  |  |  |
| Demographic Data Collection | **X** |  |  |  |  |  |  |  |  |  |
| Physical Examination (PE) | **X** |  |  |  |  |  |  |  |  | General condition, skin, height, weight, cardiopulmonary auscultation, etc. |
| Vital Signs Measurement | **X** |  | **X** |  |  |  |  |  |  | Measurement: temperature and blood pressure. |
| Major Medical /Surgical/Vaccination Historya | **X** |  |  |  |  |  |  |  |  | Request for disclosure of all major medical diagnoses and surgical interventions occurring within a five-year period, along with all vaccination records for immunizations administered and current medical historywithin the last 28 days. |
| Pregnancy Testingb | **X** |  | **X** |  | **X** |  |  |  |  | Performed only for women of childbearing potential (WOCBP). |
| Inclusion Criteria | **X** |  |  |  |  |  |  |  |  |  |
| Exclusion Criteria | **X** |  | **X** |  |  |  |  |  |  |  |
| **Blood Collection and Laboratory Tests** | | | | | | | | | | |
| Anti-gE & Anti-VZV Antibody Testing | **X** |  | **X** |  | **X** | **X** | **X** | **X** | **X** |  |
| Anti-Fc & Antinuclear Antibody (ANA) Testing | **X** |  |  |  | **X** |  |  |  |  |  |
| **Vaccine Administration** | | | | | | | | | | |
| Randomization | **X** |  |  |  |  |  |  |  |  |  |
| Vaccination | **X** |  | **X** |  |  |  |  |  |  | Administer 1 dose on D0 and D30 respectively. |
| 30-minute  Post-vaccination Observation | **X** |  | **X** |  |  |  |  |  |  |  |
| **Safety Data Collection** | | | | | | | | | | |
| Diary Card Distribution | **X** |  | **X** |  |  |  |  |  |  |  |
| Diary Card Collection |  | **X** |  | **X** |  |  |  |  |  |  |
| Contact Card Distribution |  | **X** |  | **X** |  |  |  |  |  |  |
| Contact Card Collection |  |  | **X** |  | **X** |  |  |  |  |  |
| Concomitant Medication Recording | **X** | **X** | **X** | **X** | **X** |  |  |  |  |  |
| Adverse Event (AE) Collectionc | **X** | **X** | **X** | **X** | **X** |  |  |  |  | Participants experiencing adverse events will be followed until resolution/stabilization, return to baseline status, determination by the investigator that follow-up is no longer required, or loss to follow-up. |
| Pregnancy Event Collection | **X** | **X** | **X** | **X** | **X** | **X** |  |  |  |  |
| Serious Adverse Event (SAE) Collectionc | **X** | **X** | **X** | **X** | **X** | **X** |  |  |  |  |
| a. Major medical history is defined as conditions requiring emergency care, hospitalization, and/or surgery.  b. Women of childbearing potential (WOCBP) are defined as individuals from menarche to menopause, unless they have undergone hysterectomy, bilateral salpingectomy, or bilateral oophorectomy. Postmenopausal status is defined as the absence of menstrual periods for 12 consecutive months in the absence of other medical causes.  c. Adverse events (AEs) and Serious adverse events (SAEs) were coded according to MedDRA version 25.1.  X=All participants. | | | | | | | | | | |

## Analysis Populations

**(1) Full Analysis Set (FAS):** Defined according to the intention-to-treat (ITT) principle as participants who were randomized, received the first vaccine dose, underwent pre–first vaccination immunogenicity blood sampling, and had valid baseline antibody results. Participants who received an incorrect vaccine were analyzed for immunogenicity according to their originally randomized treatment group.

**(2) Per-protocol Set 1 (PPS1):** Included all participants who did not violate inclusion/exclusion criteria, were randomized, received the first dose, completed immunogenicity blood sampling at pre–first vaccination and 30 days after first, and had valid antibody results.

Participants meeting any of the following criteria were excluded from PPS1: (1) received an incorrect vaccine for dose 1; (2) used protocol-prohibited vaccines or medications between enrollment and the immunogenicity blood draw at 30 days after dose 1; (3) had major protocol deviations between enrollment and the immunogenicity blood draw at 30 days after dose 1; or (4) had other circumstances that could affect the immunogenicity assessment at 30 days after dose 1.

**(3) Per-protocol Set 2 (PPS2):** Included all participants who did not violate inclusion/exclusion criteria, were randomized, completed the full vaccination regimen, completed immunogenicity blood sampling at pre–first vaccination and 30 days after full vaccination, and had valid antibody results.

Participants meeting any of the following criteria were excluded from PPS2: (1) received an incorrect vaccine; (2) used protocol-prohibited vaccines or medications between enrollment and the immunogenicity blood draw at 30 days after full vaccination; (3) had major protocol deviations between enrollment and the immunogenicity blood draw at 30 days after full vaccination; or (4) had other circumstances that could affect the immunogenicity assessment at 30 days after full vaccination.

The FAS, PPS1, and PPS2 were primarily used for immunogenicity evaluations. These analysis populations were defined separately for anti-gE antibodies and anti–VZV antibodies in our trial.

**(4) Safety Set (SS):** Included all enrolled participants who received at least 1 dose of the investigational vaccine. In this trial, safety analyses for each dose were conducted based on the number of participants who actually received that dose.

**(5) Safety Set 1 (SS1):** Included all participants who received first dose of the investigational vaccine.

**(6) Safety Set 2 (SS2):** Included all participants who received second dose of the investigational vaccine.

The SS was primarily used for safety evaluations.

**Sample Size Calculation**

Sample size calculation assumed a seroconversion rate of 80% in both vaccine groups and 25% in the placebo group, with a one-sided significance level of α=0.025. Under these assumptions, 120 participants per group were required to achieve at least 90% power to detect a difference between each vaccine group and the placebo group. To account for potential dropout and regulatory requirements, the planned enrollment was increased to 150 participants per group. The total sample size was 450 participants, who were randomized in a 1:1:1 ratio to the 50 μg dose group, 100 μg dose group, or placebo group (150 participants per group).

## Immunogenicity Outcomes

**The immunogenicity outcomes of anti-gE antibodies are defined as follows:**

1. **Seropositivity rate**: A positive antibody response is defined as antibody concentration ≥0.1 IU/mL(or 100mIU/mL) after vaccination.
2. **Seroconversion rate:** A positive antibody conversion is defined as: if the pre-vaccination antibody concentration is <0.1 IU/mL and post-vaccination antibody concentration is ≥0.1 IU/mL; or if the pre-vaccination antibody concentration is between 0.1 and 2.0 IU/mL (including 2.0 IU/mL) and the post-vaccination antibody concentration shows a ≥4-fold increase; or if the pre-vaccination antibody concentration is ≥2.0 IU/mL and the post-vaccination antibody concentration shows a ≥2-fold increase. The percentage of participants with seroconversion of serum antibodies after vaccination is the seroconversion rate of anti-VZV antibody concentration.

**The immunogenicity outcomes of anti-VZV antibodies are defined as follows:**

1. **Seropositivity rate:** A positive antibody response is defined as antibody titer is ≥1:4 after vaccination.
2. **Seroconversion rate:** A positive antibody conversion is defined as:if the pre-vaccination antibody titer is <1:4 and post-vaccination antibody titer is ≥1:8; or if the pre-vaccination antibody titer is ≥1:4 and the post-vaccination antibody titer shows a ≥4-fold increase. The percentage of participants with seroconversion of serum antibodies after vaccination is the seroconversion rate of anti-VZV antibody titer.

## Safety outcomes

**1. Solicited adverse events(AEs)**

Solicited local and systemic AEs were actively collected during the solicitation period (0–7 days post-vaccination) and are summarized below:

1. Solicited local AEs: Pain, induration, swelling, erythema, pruritus
2. Solicited systemic AEs: Fever, diarrhea, vomiting, nausea, myalgia, headache, fatigue, abdominal pain, chills, acute hypersensitivity reactions

**2. Unsolicited adverse events**

Defined as all adverse events other than the solicited AEs. (Solicited AEs occurring after day 7 post-vaccination are recorded as unsolicited AEs).

Special Laboratory Tests

Changes in anti-Fc antibody and anti-nuclear antibody (ANA) levels compared to pre-immunization levels at 30 days post-full vaccination.

**3. Serious Adverse Events (SAEs)**

SAE is defined as any untoward medical occurrence that, at any dose, meets one of the following criteria:

1. Results in death.
2. Is life-threatening.
3. Requires inpatient hospitalization or prolongation of existing hospitalization.
4. Results in persistent or significant disability/incapacity.
5. Results in a congenital anomaly/birth defect.
6. Is otherwise considered a medically important event (e.g., requires appropriate intervention to prevent one of the other outcomes listed above).

# Additional file: Tables

# Table S1. Number of participants included in each analysis set

| **Analysis Population** | **50 μg dose**  **n(%)[1]** | **100 μg dose**  **n(%)** | **Placebo**  **n(%)** | **Total**  **n(%)** |
| --- | --- | --- | --- | --- |
| Efficacy Analysis Population |  |  |  |  |
| FAS | 150 (100.00) | 150 (100.00) | 150 (100.00) | 450 (100.00) |
| PPS1 | 147 (98.00) | 142 (94.67) | 145 (96.67) | 434 (96.44) |
| PPS2 | 146 (97.33) | 140 (93.33) | 143 (95.33) | 429 (95.33) |
| Safety Analysis Population |  |  |  |  |
| SS | 150 | 149 | 151 | 450 (100.00) |
| SS1 | 150 | 149 | 151 | 450 (100.00) |
| SS2 | 148 | 145 | 147 | 440 (97.78) |

[1] Percentages are calculated with the number of randomized participants as the denominator.

*Participant A038, who was planned to receive high-dose vaccine, actually received placebo. FAS is analyzed by the high-dose group, while SS, SS1, and SS2 are analyzed by the placebo group.

# [Table S2. Protocol deviations and violations](#_eTable_2._Protocol)

| **Category** | **50 μg dose (N=150)[1]** | | | **100 μg dose (N=150)** | | | **Placebo (N=450)** | | | ***P-*values[2]** |
| --- | --- | --- | --- | --- | --- | --- | --- | --- | --- | --- |
| **nE[3]** | **n[4]** | **(%)[5]** | **nE** | **n** | **(%)** | **nE** | **n** | **(%)** |  |
| **Overall** | 33 | 29 | 19.33 | 19 | 18 | 12.00 | 25 | 24 | 16.00 | 0.2257 |
| **Protocol violation** | 23 | 19 | 12.67 | 9 | 8 | 5.33 | 12 | 12 | 8.00 | 0.0792 |
| Serious adverse event not reported or reported later than 24 h | 5 | 5 | 3.33 | 2 | 2 | 1.33 | 2 | 2 | 1.33 | 0.5236 |
| Administration of the incorrect vaccine group or dose to participants | 1 | 1 | 0.67 | 0 | 0 | 0.00 | 0 | 0 | 0.00 | 1.0000 |
| Other | 17 | 14 | 9.33 | 7 | 6 | 4.00 | 10 | 10 | 6.67 | 0.1967 |
| **Protocol deviation** | 10 | 10 | 6.67 | 10 | 10 | 6.67 | 13 | 12 | 8.00 | 0.9209 |
| Missed visit window | 8 | 8 | 5.33 | 6 | 6 | 4.00 | 13 | 12 | 8.00 | 0.3666 |
| Other | 2 | 2 | 1.33 | 4 | 4 | 2.67 | 0 | 0 | 0.00 | 0.1734 |

[1] N = number of participants in each group. [2] *P*-values were calculated using Fisher's exact test. [3] nE = number of protocol deviation or violation events. [4] n = number of participants who reported protocol deviation or violation events. [5] % = the percentage of participants who reported protocol deviation or violation in each group.

# [Table S3. The incidence of adverse events after two doses of vaccination](#eTable3)

| **Systemic organ categories (SOC)** | **50 μg dose (1)** | | | | **100 μg dose (2)** | | | | **Placebo (2)** | | | | **Total** | | | | ***P*[1]*(1)*VS*(2)*** | ***P(1)*VS*(3)*** | ***P(2)VS(3)*** |
| --- | --- | --- | --- | --- | --- | --- | --- | --- | --- | --- | --- | --- | --- | --- | --- | --- | --- | --- | --- |
| **Preferred term (PT)** | **N[2]** | **nAE[3]** | **n[4]** | **(%)[5]** | **N** | **nAE** | **n** | **(%)** | **N** | **nAE** | **n** | **(%)** | **N** | **nAE** | **n** | **(%)** |
| **TEAE** | 150 | 111 | 59 | 39.33 | 149 | 146 | 58 | 38.93 | 151 | 76 | 43 | 28.48 | 450 | 333 | 160 | 35.56 | 1.0000 | 0.0519 | 0.0668 |
| First dose | 150 | 57 | 39 | 26.00 | 149 | 82 | 45 | 30.20 | 151 | 60 | 36 | 23.84 | 450 | 199 | 120 | 26.67 | 0.4422 | 0.6909 | 0.2426 |
| Second dose | 148 | 54 | 33 | 22.30 | 145 | 64 | 27 | 18.62 | 147 | 16 | 12 | 8.16 | 440 | 134 | 72 | 16.36 | 0.4711 | 0.0010 | 0.0098 |
| **Systemic and local AEs** | 150 | 48 | 30 | 20.00 | 149 | 76 | 39 | 26.17 | 151 | 22 | 17 | 11.26 | 450 | 146 | 86 | 19.11 | 0.2191 | 0.0400 | 0.0010 |
| First dose | 150 | 26 | 20 | 13.33 | 149 | 48 | 28 | 18.79 | 151 | 18 | 14 | 9.27 | 450 | 92 | 62 | 13.78 | 0.2112 | 0.2807 | 0.0199 |
| Second dose | 148 | 22 | 17 | 11.49 | 145 | 28 | 21 | 14.48 | 147 | 4 | 4 | 2.72 | 440 | 54 | 42 | 9.55 | 0.4895 | 0.0054 | 0.0003 |
| Injection-site pain | 150 | 16 | 15 | 10.00 | 149 | 37 | 26 | 17.45 | 151 | 7 | 7 | 4.64 | 450 | 60 | 48 | 10.67 | 0.0663 | 0.0807 | 0.0004 |
| First dose | 150 | 8 | 8 | 5.33 | 149 | 21 | 18 | 12.08 | 151 | 5 | 5 | 3.31 | 450 | 34 | 31 | 6.89 | 0.0420 | 0.4127 | 0.0046 |
| Second dose | 148 | 8 | 8 | 5.41 | 145 | 16 | 16 | 11.03 | 147 | 2 | 2 | 1.36 | 440 | 26 | 26 | 5.91 | 0.0907 | 0.1034 | 0.0005 |
| Fatigue | 150 | 13 | 10 | 6.67 | 149 | 10 | 10 | 6.71 | 151 | 8 | 7 | 4.64 | 450 | 31 | 27 | 6.00 | 1.0000 | 0.4669 | 0.4654 |
| First dose | 150 | 7 | 7 | 4.67 | 149 | 6 | 6 | 4.03 | 151 | 8 | 7 | 4.64 | 450 | 21 | 20 | 4.44 | 1.0000 | 1.0000 | 1.0000 |
| Second dose | 148 | 6 | 6 | 4.05 | 145 | 4 | 4 | 2.76 | 147 | 0 | 0 | 0.00 | 440 | 10 | 10 | 2.27 | 0.7497 | 0.0297 | 0.0595 |
| Injection-site itch | 150 | 5 | 5 | 3.33 | 149 | 9 | 8 | 5.37 | 151 | 4 | 3 | 1.99 | 450 | 18 | 16 | 3.56 | 0.4127 | 0.5012 | 0.1366 |
| First dose | 150 | 4 | 4 | 2.67 | 149 | 7 | 7 | 4.70 | 151 | 3 | 3 | 1.99 | 450 | 14 | 14 | 3.11 | 0.3778 | 0.7229 | 0.2164 |
| Second dose | 148 | 1 | 1 | 0.68 | 145 | 2 | 2 | 1.38 | 147 | 1 | 1 | 0.68 | 440 | 4 | 4 | 0.91 | 0.6199 | 1.0000 | 0.6211 |
| Injection-site redness | 150 | 2 | 1 | 0.67 | 149 | 9 | 8 | 5.37 | 151 | 0 | 0 | 0.00 | 450 | 11 | 9 | 2.00 | 0.0195 | 0.4983 | 0.0034 |
| First dose | 150 | 1 | 1 | 0.67 | 149 | 7 | 7 | 4.70 | 151 | 0 | 0 | 0.00 | 450 | 8 | 8 | 1.78 | 0.0363 | 0.4983 | 0.0069 |
| Second dose | 148 | 1 | 1 | 0.68 | 145 | 2 | 2 | 1.38 | 147 | 0 | 0 | 0.00 | 440 | 3 | 3 | 0.68 | 0.6199 | 1.0000 | 0.2457 |
| Injection-site induration | 150 | 2 | 2 | 1.33 | 149 | 4 | 3 | 2.01 | 151 | 0 | 0 | 0.00 | 450 | 6 | 5 | 1.11 | 0.6843 | 0.2475 | 0.1213 |
| First dose | 150 | 1 | 1 | 0.67 | 149 | 3 | 3 | 2.01 | 151 | 0 | 0 | 0.00 | 450 | 4 | 4 | 0.89 | 0.3708 | 0.4983 | 0.1213 |
| Second dose | 148 | 1 | 1 | 0.68 | 145 | 1 | 1 | 0.69 | 147 | 0 | 0 | 0.00 | 440 | 2 | 2 | 0.45 | 1.0000 | 1.0000 | 0.4966 |
| Chills | 150 | 4 | 4 | 2.67 | 149 | 0 | 0 | 0.00 | 151 | 0 | 0 | 0.00 | 450 | 4 | 4 | 0.89 | 0.1225 | 0.0604 | 1.0000 |
| First dose | 150 | 3 | 3 | 2.00 | 149 | 0 | 0 | 0.00 | 151 | 0 | 0 | 0.00 | 450 | 3 | 3 | 0.67 | 0.2475 | 0.1225 | 1.0000 |
| Second dose | 148 | 1 | 1 | 0.68 | 145 | 0 | 0 | 0.00 | 147 | 0 | 0 | 0.00 | 440 | 1 | 1 | 0.23 | 1.0000 | 1.0000 | 1.0000 |
| Injection-site swelling | 150 | 1 | 1 | 0.67 | 149 | 2 | 2 | 1.34 | 151 | 1 | 1 | 0.66 | 450 | 4 | 4 | 0.89 | 0.6225 | 1.0000 | 0.6212 |
| First dose | 150 | 1 | 1 | 0.67 | 149 | 1 | 1 | 0.67 | 151 | 1 | 1 | 0.66 | 450 | 3 | 3 | 0.67 | 1.0000 | 1.0000 | 1.0000 |
| Second dose | 148 | 0 | 0 | 0.00 | 145 | 1 | 1 | 0.69 | 147 | 0 | 0 | 0.00 | 440 | 1 | 1 | 0.23 | 0.4949 | 1.0000 | 0.4966 |
| Fever | 150 | 1 | 1 | 0.67 | 149 | 2 | 2 | 1.34 | 151 | 0 | 0 | 0.00 | 450 | 3 | 3 | 0.67 | 0.6225 | 0.4983 | 0.2458 |
| First dose | 150 | 1 | 1 | 0.67 | 149 | 2 | 2 | 1.34 | 151 | 0 | 0 | 0.00 | 450 | 3 | 3 | 0.67 | 0.6225 | 0.4983 | 0.2458 |
| Second dose | 148 | 0 | 0 | 0.00 | 145 | 0 | 0 | 0.00 | 147 | 0 | 0 | 0.00 | 440 | 0 | 0 | 0.00 | 1.0000 | 1.0000 | 1.0000 |
| Injection-site discomfort | 150 | 1 | 1 | 0.67 | 149 | 1 | 1 | 0.67 | 151 | 0 | 0 | 0.00 | 450 | 2 | 2 | 0.44 | 1.0000 | 0.4983 | 0.4967 |
| First dose | 150 | 0 | 0 | 0.00 | 149 | 0 | 0 | 0.00 | 151 | 0 | 0 | 0.00 | 450 | 0 | 0 | 0.00 | 1.0000 | 1.0000 | 1.0000 |
| Second dose | 148 | 1 | 1 | 0.68 | 145 | 1 | 1 | 0.69 | 147 | 0 | 0 | 0.00 | 440 | 2 | 2 | 0.45 | 1.0000 | 1.0000 | 0.4967 |
| Injection-site discolouration | 150 | 1 | 1 | 0.67 | 149 | 0 | 0 | 0.00 | 151 | 1 | 1 | 0.66 | 450 | 2 | 2 | 0.44 | 1.0000 | 1.0000 | 1.0000 |
| First dose | 150 | 0 | 0 | 0.00 | 149 | 0 | 0 | 0.00 | 151 | 1 | 1 | 0.66 | 450 | 1 | 1 | 0.22 | 1.0000 | 1.0000 | 1.0000 |
| Second dose | 148 | 1 | 1 | 0.68 | 145 | 0 | 0 | 0.00 | 147 | 0 | 0 | 0.00 | 440 | 1 | 1 | 0.23 | 1.0000 | 1.0000 | 1.0000 |
| Chest pain | 150 | 0 | 0 | 0.00 | 149 | 2 | 2 | 1.34 | 151 | 0 | 0 | 0.00 | 450 | 2 | 2 | 0.44 | 0.2475 | 1.0000 | 0.2458 |
| First dose | 150 | 0 | 0 | 0.00 | 149 | 1 | 1 | 0.67 | 151 | 0 | 0 | 0.00 | 450 | 1 | 1 | 0.22 | 0.4983 | 1.0000 | 0.4967 |
| Second dose | 148 | 0 | 0 | 0.00 | 145 | 1 | 1 | 0.69 | 147 | 0 | 0 | 0.00 | 440 | 1 | 1 | 0.23 | 0.4949 | 1.0000 | 0.4966 |
| Cyst | 150 | 0 | 0 | 0.00 | 149 | 0 | 0 | 0.00 | 151 | 1 | 1 | 0.66 | 450 | 1 | 1 | 0.22 | 1.0000 | 1.0000 | 1.0000 |
| First dose | 150 | 0 | 0 | 0.00 | 149 | 0 | 0 | 0.00 | 151 | 0 | 0 | 0.00 | 450 | 0 | 0 | 0.00 | 1.0000 | 1.0000 | 1.0000 |
| Second dose | 148 | 0 | 0 | 0.00 | 145 | 0 | 0 | 0.00 | 147 | 1 | 1 | 0.68 | 440 | 1 | 1 | 0.23 | 1.0000 | 0.4983 | 1.0000 |
| Unspecified disease | 150 | 1 | 1 | 0.67 | 149 | 0 | 0 | 0.00 | 151 | 0 | 0 | 0.00 | 450 | 1 | 1 | 0.22 | 1.0000 | 0.4983 | 1.0000 |
| First dose | 150 | 0 | 0 | 0.00 | 149 | 0 | 0 | 0.00 | 151 | 0 | 0 | 0.00 | 450 | 0 | 0 | 0.00 | 1.0000 | 1.0000 | 1.0000 |
| Second dose | 148 | 1 | 1 | 0.68 | 145 | 0 | 0 | 0.00 | 147 | 0 | 0 | 0.00 | 440 | 1 | 1 | 0.23 | 1.0000 | 1.0000 | 1.0000 |
| Chest discomfort | 150 | 1 | 1 | 0.67 | 149 | 0 | 0 | 0.00 | 151 | 0 | 0 | 0.00 | 450 | 1 | 1 | 0.22 | 1.0000 | 0.4983 | 1.0000 |
| First dose | 150 | 0 | 0 | 0.00 | 149 | 0 | 0 | 0.00 | 151 | 0 | 0 | 0.00 | 450 | 0 | 0 | 0.00 | 1.0000 | 1.0000 | 1.0000 |
| Second dose | 148 | 1 | 1 | 0.68 | 145 | 0 | 0 | 0.00 | 147 | 0 | 0 | 0.00 | 440 | 1 | 1 | 0.23 | 1.0000 | 1.0000 | 1.0000 |
| **Gastrointestinal disorders** | 150 | 20 | 17 | 11.33 | 149 | 13 | 11 | 7.38 | 151 | 9 | 6 | 3.97 | 450 | 42 | 34 | 7.56 | 0.3211 | 0.0176 | 0.2219 |
| First dose | 150 | 10 | 10 | 6.67 | 149 | 7 | 6 | 4.03 | 151 | 4 | 4 | 2.65 | 450 | 21 | 20 | 4.44 | 0.4419 | 0.1093 | 0.5398 |
| Second dose | 148 | 10 | 10 | 6.76 | 145 | 6 | 5 | 3.45 | 147 | 5 | 2 | 1.36 | 440 | 21 | 17 | 3.86 | 0.2893 | 0.0348 | 0.2806 |
| Diarrhea | 150 | 2 | 1 | 0.67 | 149 | 3 | 3 | 2.01 | 151 | 2 | 2 | 1.32 | 450 | 7 | 6 | 1.33 | 0.3708 | 1.0000 | 0.6833 |
| First dose | 150 | 1 | 1 | 0.67 | 149 | 2 | 2 | 1.34 | 151 | 1 | 1 | 0.66 | 450 | 4 | 4 | 0.89 | 0.6225 | 1.0000 | 0.6212 |
| Second dose | 148 | 1 | 1 | 0.68 | 145 | 1 | 1 | 0.69 | 147 | 1 | 1 | 0.68 | 440 | 3 | 3 | 0.68 | 1.0000 | 1.0000 | 1.0000 |
| Abdominal pain | 150 | 2 | 2 | 1.33 | 149 | 2 | 2 | 1.34 | 151 | 1 | 1 | 0.66 | 450 | 5 | 5 | 1.11 | 1.0000 | 0.6225 | 0.6212 |
| First dose | 150 | 1 | 1 | 0.67 | 149 | 1 | 1 | 0.67 | 151 | 1 | 1 | 0.66 | 450 | 3 | 3 | 0.67 | 1.0000 | 1.0000 | 1.0000 |
| Second dose | 148 | 1 | 1 | 0.68 | 145 | 1 | 1 | 0.69 | 147 | 0 | 0 | 0.00 | 440 | 2 | 2 | 0.45 | 1.0000 | 1.0000 | 0.4966 |
| Nausea | 150 | 3 | 3 | 2.00 | 149 | 1 | 1 | 0.67 | 151 | 0 | 0 | 0.00 | 450 | 4 | 4 | 0.89 | 0.6225 | 0.1225 | 0.4967 |
| First dose | 150 | 1 | 1 | 0.67 | 149 | 0 | 0 | 0.00 | 151 | 0 | 0 | 0.00 | 450 | 1 | 1 | 0.22 | 1.0000 | 0.4983 | 1.0000 |
| Second dose | 148 | 2 | 2 | 1.35 | 145 | 1 | 1 | 0.69 | 147 | 0 | 0 | 0.00 | 440 | 3 | 3 | 0.68 | 1.0000 | 0.4983 | 0.4966 |
| Toothache | 150 | 3 | 3 | 2.00 | 149 | 0 | 0 | 0.00 | 151 | 1 | 1 | 0.66 | 450 | 4 | 4 | 0.89 | 0.2475 | 0.3708 | 1.0000 |
| First dose | 150 | 1 | 1 | 0.67 | 149 | 0 | 0 | 0.00 | 151 | 1 | 1 | 0.66 | 450 | 2 | 2 | 0.44 | 1.0000 | 1.0000 | 1.0000 |
| Second dose | 148 | 2 | 2 | 1.35 | 145 | 0 | 0 | 0.00 | 147 | 0 | 0 | 0.00 | 440 | 2 | 2 | 0.45 | 0.4983 | 0.4983 | 1.0000 |
| Chronic gastritis | 150 | 2 | 2 | 1.33 | 149 | 0 | 0 | 0.00 | 151 | 1 | 1 | 0.66 | 450 | 3 | 3 | 0.67 | 0.4983 | 0.6225 | 1.0000 |
| First dose | 150 | 1 | 1 | 0.67 | 149 | 0 | 0 | 0.00 | 151 | 0 | 0 | 0.00 | 450 | 1 | 1 | 0.22 | 1.0000 | 0.4983 | 1.0000 |
| Second dose | 148 | 1 | 1 | 0.68 | 145 | 0 | 0 | 0.00 | 147 | 1 | 1 | 0.68 | 440 | 2 | 2 | 0.45 | 1.0000 | 1.0000 | 1.0000 |
| Non-infectious gingivitis | 150 | 1 | 1 | 0.67 | 149 | 2 | 2 | 1.34 | 151 | 0 | 0 | 0.00 | 450 | 3 | 3 | 0.67 | 0.6225 | 0.4983 | 0.2458 |
| First dose | 150 | 1 | 1 | 0.67 | 149 | 2 | 2 | 1.34 | 151 | 0 | 0 | 0.00 | 450 | 3 | 3 | 0.67 | 0.6225 | 0.4983 | 0.2458 |
| Second dose | 148 | 0 | 0 | 0.00 | 145 | 0 | 0 | 0.00 | 147 | 0 | 0 | 0.00 | 440 | 0 | 0 | 0.00 | 1.0000 | 1.0000 | 1.0000 |
| Oral ulcer | 150 | 1 | 1 | 0.67 | 149 | 1 | 1 | 0.67 | 151 | 0 | 0 | 0.00 | 450 | 2 | 2 | 0.44 | 1.0000 | 0.4983 | 0.4967 |
| First dose | 150 | 0 | 0 | 0.00 | 149 | 1 | 1 | 0.67 | 151 | 0 | 0 | 0.00 | 450 | 1 | 1 | 0.22 | 0.4983 | 1.0000 | 0.4967 |
| Second dose | 148 | 1 | 1 | 0.68 | 145 | 0 | 0 | 0.00 | 147 | 0 | 0 | 0.00 | 440 | 1 | 1 | 0.23 | 1.0000 | 1.0000 | 1.0000 |
| Gingival pain | 150 | 1 | 1 | 0.67 | 149 | 1 | 1 | 0.67 | 151 | 0 | 0 | 0.00 | 450 | 2 | 2 | 0.44 | 1.0000 | 0.4983 | 0.4967 |
| First dose | 150 | 0 | 0 | 0.00 | 149 | 1 | 1 | 0.67 | 151 | 0 | 0 | 0.00 | 450 | 1 | 1 | 0.22 | 0.4983 | 1.0000 | 0.4967 |
| Second dose | 148 | 1 | 1 | 0.68 | 145 | 0 | 0 | 0.00 | 147 | 0 | 0 | 0.00 | 440 | 1 | 1 | 0.23 | 1.0000 | 1.0000 | 1.0000 |
| Abdominal discomfort | 150 | 2 | 2 | 1.33 | 149 | 0 | 0 | 0.00 | 151 | 0 | 0 | 0.00 | 450 | 2 | 2 | 0.44 | 0.4983 | 0.2475 | 1.0000 |
| First dose | 150 | 2 | 2 | 1.33 | 149 | 0 | 0 | 0.00 | 151 | 0 | 0 | 0.00 | 450 | 2 | 2 | 0.44 | 0.4983 | 0.2475 | 1.0000 |
| Second dose | 148 | 0 | 0 | 0.00 | 145 | 0 | 0 | 0.00 | 147 | 0 | 0 | 0.00 | 440 | 0 | 0 | 0.00 | 1.0000 | 1.0000 | 1.0000 |
| Oral hypoesthesia | 150 | 1 | 1 | 0.67 | 149 | 0 | 0 | 0.00 | 151 | 0 | 0 | 0.00 | 450 | 1 | 1 | 0.22 | 1.0000 | 0.4983 | 1.0000 |
| First dose | 150 | 1 | 1 | 0.67 | 149 | 0 | 0 | 0.00 | 151 | 0 | 0 | 0.00 | 450 | 1 | 1 | 0.22 | 1.0000 | 0.4983 | 1.0000 |
| Second dose | 148 | 0 | 0 | 0.00 | 145 | 0 | 0 | 0.00 | 147 | 0 | 0 | 0.00 | 440 | 0 | 0 | 0.00 | 1.0000 | 1.0000 | 1.0000 |
| Vomiting | 150 | 1 | 1 | 0.67 | 149 | 0 | 0 | 0.00 | 151 | 0 | 0 | 0.00 | 450 | 1 | 1 | 0.22 | 1.0000 | 0.4983 | 1.0000 |
| First dose | 150 | 1 | 1 | 0.67 | 149 | 0 | 0 | 0.00 | 151 | 0 | 0 | 0.00 | 450 | 1 | 1 | 0.22 | 1.0000 | 0.4983 | 1.0000 |
| Second dose | 148 | 0 | 0 | 0.00 | 145 | 0 | 0 | 0.00 | 147 | 0 | 0 | 0.00 | 440 | 0 | 0 | 0.00 | 1.0000 | 1.0000 | 1.0000 |
| Haemorrhoids | 150 | 0 | 0 | 0.00 | 149 | 0 | 0 | 0.00 | 151 | 1 | 1 | 0.66 | 450 | 1 | 1 | 0.22 | 1.0000 | 1.0000 | 1.0000 |
| First dose | 150 | 0 | 0 | 0.00 | 149 | 0 | 0 | 0.00 | 151 | 0 | 0 | 0.00 | 450 | 0 | 0 | 0.00 | 1.0000 | 1.0000 | 1.0000 |
| Second dose | 148 | 0 | 0 | 0.00 | 145 | 0 | 0 | 0.00 | 147 | 1 | 1 | 0.68 | 440 | 1 | 1 | 0.23 | 1.0000 | 0.4983 | 1.0000 |
| Gastric polyp | 150 | 0 | 0 | 0.00 | 149 | 0 | 0 | 0.00 | 151 | 1 | 1 | 0.66 | 450 | 1 | 1 | 0.22 | 1.0000 | 1.0000 | 1.0000 |
| First dose | 150 | 0 | 0 | 0.00 | 149 | 0 | 0 | 0.00 | 151 | 0 | 0 | 0.00 | 450 | 0 | 0 | 0.00 | 1.0000 | 1.0000 | 1.0000 |
| Second dose | 148 | 0 | 0 | 0.00 | 145 | 0 | 0 | 0.00 | 147 | 1 | 1 | 0.68 | 440 | 1 | 1 | 0.23 | 1.0000 | 0.4983 | 1.0000 |
| Gastric ulcer | 150 | 0 | 0 | 0.00 | 149 | 0 | 0 | 0.00 | 151 | 1 | 1 | 0.66 | 450 | 1 | 1 | 0.22 | 1.0000 | 1.0000 | 1.0000 |
| First dose | 150 | 0 | 0 | 0.00 | 149 | 0 | 0 | 0.00 | 151 | 1 | 1 | 0.66 | 450 | 1 | 1 | 0.22 | 1.0000 | 1.0000 | 1.0000 |
| Second dose | 148 | 0 | 0 | 0.00 | 145 | 0 | 0 | 0.00 | 147 | 0 | 0 | 0.00 | 440 | 0 | 0 | 0.00 | 1.0000 | 1.0000 | 1.0000 |
| Gastroesophageal reflux disease | 150 | 0 | 0 | 0.00 | 149 | 1 | 1 | 0.67 | 151 | 0 | 0 | 0.00 | 450 | 1 | 1 | 0.22 | 0.4983 | 1.0000 | 0.4967 |
| First dose | 150 | 0 | 0 | 0.00 | 149 | 0 | 0 | 0.00 | 151 | 0 | 0 | 0.00 | 450 | 0 | 0 | 0.00 | 1.0000 | 1.0000 | 1.0000 |
| Second dose | 148 | 0 | 0 | 0.00 | 145 | 1 | 1 | 0.69 | 147 | 0 | 0 | 0.00 | 440 | 1 | 1 | 0.23 | 0.4949 | 1.0000 | 0.4967 |
| Abdominal distension | 150 | 0 | 0 | 0.00 | 149 | 1 | 1 | 0.67 | 151 | 0 | 0 | 0.00 | 450 | 1 | 1 | 0.22 | 0.4983 | 1.0000 | 0.4967 |
| First dose | 150 | 0 | 0 | 0.00 | 149 | 0 | 0 | 0.00 | 151 | 0 | 0 | 0.00 | 450 | 0 | 0 | 0.00 | 1.0000 | 1.0000 | 1.0000 |
| Second dose | 148 | 0 | 0 | 0.00 | 145 | 1 | 1 | 0.69 | 147 | 0 | 0 | 0.00 | 440 | 1 | 1 | 0.23 | 0.4949 | 1.0000 | 0.4967 |
| Tongue disorders | 150 | 0 | 0 | 0.00 | 149 | 1 | 1 | 0.67 | 151 | 0 | 0 | 0.00 | 450 | 1 | 1 | 0.22 | 0.4983 | 1.0000 | 0.4967 |
| First dose | 150 | 0 | 0 | 0.00 | 149 | 0 | 0 | 0.00 | 151 | 0 | 0 | 0.00 | 450 | 0 | 0 | 0.00 | 1.0000 | 1.0000 | 1.0000 |
| Second dose | 148 | 0 | 0 | 0.00 | 145 | 1 | 1 | 0.69 | 147 | 0 | 0 | 0.00 | 440 | 1 | 1 | 0.23 | 0.4949 | 1.0000 | 0.4967 |
| Hiatus hernia | 150 | 0 | 0 | 0.00 | 149 | 0 | 0 | 0.00 | 151 | 1 | 1 | 0.66 | 450 | 1 | 1 | 0.22 | 1.0000 | 1.0000 | 1.0000 |
| First dose | 150 | 0 | 0 | 0.00 | 149 | 0 | 0 | 0.00 | 151 | 0 | 0 | 0.00 | 450 | 0 | 0 | 0.00 | 1.0000 | 1.0000 | 1.0000 |
| Second dose | 148 | 0 | 0 | 0.00 | 145 | 0 | 0 | 0.00 | 147 | 1 | 1 | 0.68 | 440 | 1 | 1 | 0.23 | 1.0000 | 0.4983 | 1.0000 |
| Dental caries | 150 | 1 | 1 | 0.67 | 149 | 0 | 0 | 0.00 | 151 | 0 | 0 | 0.00 | 450 | 1 | 1 | 0.22 | 1.0000 | 0.4983 | 1.0000 |
| First dose | 150 | 0 | 0 | 0.00 | 149 | 0 | 0 | 0.00 | 151 | 0 | 0 | 0.00 | 450 | 0 | 0 | 0.00 | 1.0000 | 1.0000 | 1.0000 |
| Second dose | 148 | 1 | 1 | 0.68 | 145 | 0 | 0 | 0.00 | 147 | 0 | 0 | 0.00 | 440 | 1 | 1 | 0.23 | 1.0000 | 1.0000 | 1.0000 |
| **Nervous system disorders** | 150 | 9 | 7 | 4.67 | 149 | 14 | 10 | 6.71 | 151 | 11 | 9 | 5.96 | 450 | 34 | 26 | 5.78 | 0.4668 | 0.7982 | 0.8171 |
| First dose | 150 | 4 | 4 | 2.67 | 149 | 6 | 5 | 3.36 | 151 | 11 | 9 | 5.96 | 450 | 21 | 18 | 4.00 | 0.7497 | 0.2562 | 0.4128 |
| Second dose | 148 | 5 | 4 | 2.70 | 145 | 8 | 6 | 4.14 | 147 | 0 | 0 | 0.00 | 440 | 13 | 10 | 2.27 | 0.5382 | 0.1225 | 0.0142 |
| Headache | 150 | 6 | 5 | 3.33 | 149 | 7 | 6 | 4.03 | 151 | 7 | 6 | 3.97 | 450 | 20 | 17 | 3.78 | 0.7698 | 1.0000 | 1.0000 |
| First dose | 150 | 2 | 2 | 1.33 | 149 | 4 | 4 | 2.68 | 151 | 7 | 6 | 3.97 | 450 | 13 | 12 | 2.67 | 0.4476 | 0.2825 | 0.7498 |
| Second dose | 148 | 4 | 3 | 2.03 | 145 | 3 | 3 | 2.07 | 147 | 0 | 0 | 0.00 | 440 | 7 | 6 | 1.36 | 1.0000 | 0.2475 | 0.1212 |
| Dizziness | 150 | 1 | 1 | 0.67 | 149 | 6 | 6 | 4.03 | 151 | 3 | 3 | 1.99 | 450 | 10 | 10 | 2.22 | 0.0667 | 0.6225 | 0.3338 |
| First dose | 150 | 1 | 1 | 0.67 | 149 | 2 | 2 | 1.34 | 151 | 3 | 3 | 1.99 | 450 | 6 | 6 | 1.33 | 0.6225 | 0.6225 | 1.0000 |
| Second dose | 148 | 0 | 0 | 0.00 | 145 | 4 | 4 | 2.76 | 147 | 0 | 0 | 0.00 | 440 | 4 | 4 | 0.91 | 0.0587 | 1.0000 | 0.0595 |
| Migraine | 150 | 0 | 0 | 0.00 | 149 | 1 | 1 | 0.67 | 151 | 0 | 0 | 0.00 | 450 | 1 | 1 | 0.22 | 0.4983 | 1.0000 | 0.4967 |
| First dose | 150 | 0 | 0 | 0.00 | 149 | 0 | 0 | 0.00 | 151 | 0 | 0 | 0.00 | 450 | 0 | 0 | 0.00 | 1.0000 | 1.0000 | 1.0000 |
| Second dose | 148 | 0 | 0 | 0.00 | 145 | 1 | 1 | 0.69 | 147 | 0 | 0 | 0.00 | 440 | 1 | 1 | 0.23 | 0.4949 | 1.0000 | 0.4967 |
| Dysgeusia | 150 | 0 | 0 | 0.00 | 149 | 0 | 0 | 0.00 | 151 | 1 | 1 | 0.66 | 450 | 1 | 1 | 0.22 | 1.0000 | 1.0000 | 1.0000 |
| First dose | 150 | 0 | 0 | 0.00 | 149 | 0 | 0 | 0.00 | 151 | 1 | 1 | 0.66 | 450 | 1 | 1 | 0.22 | 1.0000 | 1.0000 | 1.0000 |
| Second dose | 148 | 0 | 0 | 0.00 | 145 | 0 | 0 | 0.00 | 147 | 0 | 0 | 0.00 | 440 | 0 | 0 | 0.00 | 1.0000 | 1.0000 | 1.0000 |
| Chronic inflammatory demyelinating polyneuropathy | 150 | 1 | 1 | 0.67 | 149 | 0 | 0 | 0.00 | 151 | 0 | 0 | 0.00 | 450 | 1 | 1 | 0.22 | 1.0000 | 0.4983 | 1.0000 |
| First dose | 150 | 1 | 1 | 0.67 | 149 | 0 | 0 | 0.00 | 151 | 0 | 0 | 0.00 | 450 | 1 | 1 | 0.22 | 1.0000 | 0.4983 | 1.0000 |
| Second dose | 148 | 0 | 0 | 0.00 | 145 | 0 | 0 | 0.00 | 147 | 0 | 0 | 0.00 | 440 | 0 | 0 | 0.00 | 1.0000 | 1.0000 | 1.0000 |
| Lacunar infarction | 150 | 1 | 1 | 0.67 | 149 | 0 | 0 | 0.00 | 151 | 0 | 0 | 0.00 | 450 | 1 | 1 | 0.22 | 1.0000 | 0.4983 | 1.0000 |
| First dose | 150 | 0 | 0 | 0.00 | 149 | 0 | 0 | 0.00 | 151 | 0 | 0 | 0.00 | 450 | 0 | 0 | 0.00 | 1.0000 | 1.0000 | 1.0000 |
| Second dose | 148 | 1 | 1 | 0.68 | 145 | 0 | 0 | 0.00 | 147 | 0 | 0 | 0.00 | 440 | 1 | 1 | 0.23 | 1.0000 | 1.0000 | 1.0000 |
| **Musculoskeletal and connective tissue disorders** | 150 | 8 | 8 | 5.33 | 149 | 10 | 8 | 5.37 | 151 | 6 | 4 | 2.65 | 450 | 24 | 20 | 4.44 | 1.0000 | 0.2562 | 0.2546 |
| First dose | 150 | 5 | 5 | 3.33 | 149 | 4 | 4 | 2.68 | 151 | 5 | 3 | 1.99 | 450 | 14 | 12 | 2.67 | 1.0000 | 0.5012 | 0.7219 |
| Second dose | 148 | 3 | 3 | 2.03 | 145 | 6 | 4 | 2.76 | 147 | 1 | 1 | 0.68 | 440 | 10 | 8 | 1.82 | 0.7209 | 0.6224 | 0.2123 |
| Myalgia | 150 | 3 | 3 | 2.00 | 149 | 3 | 3 | 2.01 | 151 | 3 | 2 | 1.32 | 450 | 9 | 8 | 1.78 | 1.0000 | 0.6844 | 0.6833 |
| First dose | 150 | 2 | 2 | 1.33 | 149 | 2 | 2 | 1.34 | 151 | 3 | 2 | 1.32 | 450 | 7 | 6 | 1.33 | 1.0000 | 1.0000 | 1.0000 |
| Second dose | 148 | 1 | 1 | 0.68 | 145 | 1 | 1 | 0.69 | 147 | 0 | 0 | 0.00 | 440 | 2 | 2 | 0.45 | 1.0000 | 1.0000 | 0.4966 |
| Spinal osteoarthritis | 150 | 0 | 0 | 0.00 | 149 | 3 | 3 | 2.01 | 151 | 0 | 0 | 0.00 | 450 | 3 | 3 | 0.67 | 0.1225 | 1.0000 | 0.1213 |
| First dose | 150 | 0 | 0 | 0.00 | 149 | 1 | 1 | 0.67 | 151 | 0 | 0 | 0.00 | 450 | 1 | 1 | 0.22 | 0.4983 | 1.0000 | 0.4967 |
| Second dose | 148 | 0 | 0 | 0.00 | 145 | 2 | 2 | 1.38 | 147 | 0 | 0 | 0.00 | 440 | 2 | 2 | 0.45 | 0.2441 | 1.0000 | 0.2457 |
| Intervertebral disc protrusion | 150 | 1 | 1 | 0.67 | 149 | 1 | 1 | 0.67 | 151 | 0 | 0 | 0.00 | 450 | 2 | 2 | 0.44 | 1.0000 | 0.4983 | 0.4967 |
| First dose | 150 | 0 | 0 | 0.00 | 149 | 0 | 0 | 0.00 | 151 | 0 | 0 | 0.00 | 450 | 0 | 0 | 0.00 | 1.0000 | 1.0000 | 1.0000 |
| Second dose | 148 | 1 | 1 | 0.68 | 145 | 1 | 1 | 0.69 | 147 | 0 | 0 | 0.00 | 440 | 2 | 2 | 0.45 | 1.0000 | 1.0000 | 0.4967 |
| Pain in extremity | 150 | 0 | 0 | 0.00 | 149 | 1 | 1 | 0.67 | 151 | 1 | 1 | 0.66 | 450 | 2 | 2 | 0.44 | 0.4983 | 1.0000 | 1.0000 |
| First dose | 150 | 0 | 0 | 0.00 | 149 | 1 | 1 | 0.67 | 151 | 0 | 0 | 0.00 | 450 | 1 | 1 | 0.22 | 0.4983 | 1.0000 | 0.4967 |
| Second dose | 148 | 0 | 0 | 0.00 | 145 | 0 | 0 | 0.00 | 147 | 1 | 1 | 0.68 | 440 | 1 | 1 | 0.23 | 1.0000 | 0.4983 | 1.0000 |
| Back pain | 150 | 2 | 2 | 1.33 | 149 | 0 | 0 | 0.00 | 151 | 0 | 0 | 0.00 | 450 | 2 | 2 | 0.44 | 0.4983 | 0.2475 | 1.0000 |
| First dose | 150 | 2 | 2 | 1.33 | 149 | 0 | 0 | 0.00 | 151 | 0 | 0 | 0.00 | 450 | 2 | 2 | 0.44 | 0.4983 | 0.2475 | 1.0000 |
| Second dose | 148 | 0 | 0 | 0.00 | 145 | 0 | 0 | 0.00 | 147 | 0 | 0 | 0.00 | 440 | 0 | 0 | 0.00 | 1.0000 | 1.0000 | 1.0000 |
| Arthralgia | 150 | 0 | 0 | 0.00 | 149 | 0 | 0 | 0.00 | 151 | 1 | 1 | 0.66 | 450 | 1 | 1 | 0.22 | 1.0000 | 1.0000 | 1.0000 |
| First dose | 150 | 0 | 0 | 0.00 | 149 | 0 | 0 | 0.00 | 151 | 1 | 1 | 0.66 | 450 | 1 | 1 | 0.22 | 1.0000 | 1.0000 | 1.0000 |
| Second dose | 148 | 0 | 0 | 0.00 | 145 | 0 | 0 | 0.00 | 147 | 0 | 0 | 0.00 | 440 | 0 | 0 | 0.00 | 1.0000 | 1.0000 | 1.0000 |
| Joint swelling | 150 | 0 | 0 | 0.00 | 149 | 1 | 1 | 0.67 | 151 | 0 | 0 | 0.00 | 450 | 1 | 1 | 0.22 | 0.4983 | 1.0000 | 0.4967 |
| First dose | 150 | 0 | 0 | 0.00 | 149 | 0 | 0 | 0.00 | 151 | 0 | 0 | 0.00 | 450 | 0 | 0 | 0.00 | 1.0000 | 1.0000 | 1.0000 |
| Second dose | 148 | 0 | 0 | 0.00 | 145 | 1 | 1 | 0.69 | 147 | 0 | 0 | 0.00 | 440 | 1 | 1 | 0.23 | 0.4949 | 1.0000 | 0.4966 |
| Muscular weakness | 150 | 1 | 1 | 0.67 | 149 | 0 | 0 | 0.00 | 151 | 0 | 0 | 0.00 | 450 | 1 | 1 | 0.22 | 1.0000 | 0.4983 | 1.0000 |
| First dose | 150 | 1 | 1 | 0.67 | 149 | 0 | 0 | 0.00 | 151 | 0 | 0 | 0.00 | 450 | 1 | 1 | 0.22 | 1.0000 | 0.4983 | 1.0000 |
| Second dose | 148 | 0 | 0 | 0.00 | 145 | 0 | 0 | 0.00 | 147 | 0 | 0 | 0.00 | 440 | 0 | 0 | 0.00 | 1.0000 | 1.0000 | 1.0000 |
| Myositis | 150 | 0 | 0 | 0.00 | 149 | 1 | 1 | 0.67 | 151 | 0 | 0 | 0.00 | 450 | 1 | 1 | 0.22 | 0.4983 | 1.0000 | 0.4967 |
| First dose | 150 | 0 | 0 | 0.00 | 149 | 0 | 0 | 0.00 | 151 | 0 | 0 | 0.00 | 450 | 0 | 0 | 0.00 | 1.0000 | 1.0000 | 1.0000 |
| Second dose | 148 | 0 | 0 | 0.00 | 145 | 1 | 1 | 0.69 | 147 | 0 | 0 | 0.00 | 440 | 1 | 1 | 0.23 | 0.4949 | 1.0000 | 0.4967 |
| Tenosynovitis | 150 | 1 | 1 | 0.67 | 149 | 0 | 0 | 0.00 | 151 | 0 | 0 | 0.00 | 450 | 1 | 1 | 0.22 | 1.0000 | 0.4983 | 1.0000 |
| First dose | 150 | 0 | 0 | 0.00 | 149 | 0 | 0 | 0.00 | 151 | 0 | 0 | 0.00 | 450 | 0 | 0 | 0.00 | 1.0000 | 1.0000 | 1.0000 |
| Second dose | 148 | 1 | 1 | 0.68 | 145 | 0 | 0 | 0.00 | 147 | 0 | 0 | 0.00 | 440 | 1 | 1 | 0.23 | 1.0000 | 1.0000 | 1.0000 |
| Neck pain | 150 | 0 | 0 | 0.00 | 149 | 0 | 0 | 0.00 | 151 | 1 | 1 | 0.66 | 450 | 1 | 1 | 0.22 | 1.0000 | 1.0000 | 1.0000 |
| First dose | 150 | 0 | 0 | 0.00 | 149 | 0 | 0 | 0.00 | 151 | 1 | 1 | 0.66 | 450 | 1 | 1 | 0.22 | 1.0000 | 1.0000 | 1.0000 |
| Second dose | 148 | 0 | 0 | 0.00 | 145 | 0 | 0 | 0.00 | 147 | 0 | 0 | 0.00 | 440 | 0 | 0 | 0.00 | 1.0000 | 1.0000 | 1.0000 |
| **Infections and infestations** | 150 | 4 | 4 | 2.67 | 149 | 9 | 8 | 5.37 | 151 | 8 | 8 | 5.30 | 450 | 21 | 20 | 4.44 | 0.2562 | 0.3779 | 1.0000 |
| First dose | 150 | 2 | 2 | 1.33 | 149 | 6 | 6 | 4.03 | 151 | 5 | 5 | 3.31 | 450 | 13 | 13 | 2.89 | 0.1731 | 0.4476 | 0.7690 |
| Second dose | 148 | 2 | 2 | 1.35 | 145 | 3 | 3 | 2.07 | 147 | 3 | 3 | 2.04 | 440 | 8 | 8 | 1.82 | 0.6821 | 0.6843 | 1.0000 |
| Nasopharyngitis | 150 | 3 | 3 | 2.00 | 149 | 2 | 2 | 1.34 | 151 | 2 | 2 | 1.32 | 450 | 7 | 7 | 1.56 | 1.0000 | 0.6844 | 1.0000 |
| First dose | 150 | 1 | 1 | 0.67 | 149 | 0 | 0 | 0.00 | 151 | 2 | 2 | 1.32 | 450 | 3 | 3 | 0.67 | 1.0000 | 1.0000 | 0.4984 |
| Second dose | 148 | 2 | 2 | 1.35 | 145 | 2 | 2 | 1.38 | 147 | 0 | 0 | 0.00 | 440 | 4 | 4 | 0.91 | 1.0000 | 0.4983 | 0.2457 |
| Upper respiratory tract infection | 150 | 0 | 0 | 0.00 | 149 | 2 | 2 | 1.34 | 151 | 0 | 0 | 0.00 | 450 | 2 | 2 | 0.44 | 0.2475 | 1.0000 | 0.2458 |
| First dose | 150 | 0 | 0 | 0.00 | 149 | 2 | 2 | 1.34 | 151 | 0 | 0 | 0.00 | 450 | 2 | 2 | 0.44 | 0.2475 | 1.0000 | 0.2458 |
| Second dose | 148 | 0 | 0 | 0.00 | 145 | 0 | 0 | 0.00 | 147 | 0 | 0 | 0.00 | 440 | 0 | 0 | 0.00 | 1.0000 | 1.0000 | 1.0000 |
| Pharyngitis | 150 | 0 | 0 | 0.00 | 149 | 1 | 1 | 0.67 | 151 | 1 | 1 | 0.66 | 450 | 2 | 2 | 0.44 | 0.4983 | 1.0000 | 1.0000 |
| First dose | 150 | 0 | 0 | 0.00 | 149 | 1 | 1 | 0.67 | 151 | 0 | 0 | 0.00 | 450 | 1 | 1 | 0.22 | 0.4983 | 1.0000 | 0.4967 |
| Second dose | 148 | 0 | 0 | 0.00 | 145 | 0 | 0 | 0.00 | 147 | 1 | 1 | 0.68 | 440 | 1 | 1 | 0.23 | 1.0000 | 0.4983 | 1.0000 |
| Herpes zoster | 150 | 0 | 0 | 0.00 | 149 | 0 | 0 | 0.00 | 151 | 2 | 2 | 1.32 | 450 | 2 | 2 | 0.44 | 1.0000 | 0.4983 | 0.4984 |
| First dose | 150 | 0 | 0 | 0.00 | 149 | 0 | 0 | 0.00 | 151 | 1 | 1 | 0.66 | 450 | 1 | 1 | 0.22 | 1.0000 | 1.0000 | 1.0000 |
| Second dose | 148 | 0 | 0 | 0.00 | 145 | 0 | 0 | 0.00 | 147 | 1 | 1 | 0.68 | 440 | 1 | 1 | 0.23 | 1.0000 | 0.4983 | 1.0000 |
| Oral herpes | 150 | 0 | 0 | 0.00 | 149 | 0 | 0 | 0.00 | 151 | 1 | 1 | 0.66 | 450 | 1 | 1 | 0.22 | 1.0000 | 1.0000 | 1.0000 |
| First dose | 150 | 0 | 0 | 0.00 | 149 | 0 | 0 | 0.00 | 151 | 1 | 1 | 0.66 | 450 | 1 | 1 | 0.22 | 0.4983 | 1.0000 | 1.0000 |
| Second dose | 148 | 0 | 0 | 0.00 | 145 | 0 | 0 | 0.00 | 147 | 0 | 0 | 0.00 | 440 | 0 | 0 | 0.00 | 1.0000 | 1.0000 | 1.0000 |
| Respiratory tract infection | 150 | 0 | 0 | 0.00 | 149 | 1 | 1 | 0.67 | 151 | 0 | 0 | 0.00 | 450 | 1 | 1 | 0.22 | 0.4983 | 1.0000 | 0.4967 |
| First dose | 150 | 0 | 0 | 0.00 | 149 | 1 | 1 | 0.67 | 151 | 0 | 0 | 0.00 | 450 | 1 | 1 | 0.22 | 1.0000 | 1.0000 | 0.4967 |
| Second dose | 148 | 0 | 0 | 0.00 | 145 | 0 | 0 | 0.00 | 147 | 0 | 0 | 0.00 | 440 | 0 | 0 | 0.00 | 1.0000 | 1.0000 | 1.0000 |
| Chronic otitis media | 150 | 0 | 0 | 0.00 | 149 | 0 | 0 | 0.00 | 151 | 1 | 1 | 0.66 | 450 | 1 | 1 | 0.22 | 1.0000 | 1.0000 | 1.0000 |
| First dose | 150 | 0 | 0 | 0.00 | 149 | 0 | 0 | 0.00 | 151 | 1 | 1 | 0.66 | 450 | 1 | 1 | 0.22 | 1.0000 | 1.0000 | 1.0000 |
| Second dose | 148 | 0 | 0 | 0.00 | 145 | 0 | 0 | 0.00 | 147 | 0 | 0 | 0.00 | 440 | 0 | 0 | 0.00 | 1.0000 | 1.0000 | 1.0000 |
| Bronchitis | 150 | 0 | 0 | 0.00 | 149 | 0 | 0 | 0.00 | 151 | 1 | 1 | 0.66 | 450 | 1 | 1 | 0.22 | 1.0000 | 1.0000 | 1.0000 |
| First dose | 150 | 0 | 0 | 0.00 | 149 | 0 | 0 | 0.00 | 151 | 0 | 0 | 0.00 | 450 | 0 | 0 | 0.00 | 1.0000 | 1.0000 | 1.0000 |
| Second dose | 148 | 0 | 0 | 0.00 | 145 | 0 | 0 | 0.00 | 147 | 1 | 1 | 0.68 | 440 | 1 | 1 | 0.23 | 1.0000 | 0.4983 | 1.0000 |
| Periodontitis | 150 | 1 | 1 | 0.67 | 149 | 0 | 0 | 0.00 | 151 | 0 | 0 | 0.00 | 450 | 1 | 1 | 0.22 | 1.0000 | 0.4983 | 1.0000 |
| First dose | 150 | 1 | 1 | 0.67 | 149 | 0 | 0 | 0.00 | 151 | 0 | 0 | 0.00 | 450 | 1 | 1 | 0.22 | 0.4983 | 0.4983 | 1.0000 |
| Second dose | 148 | 0 | 0 | 0.00 | 145 | 0 | 0 | 0.00 | 147 | 0 | 0 | 0.00 | 440 | 0 | 0 | 0.00 | 1.0000 | 1.0000 | 1.0000 |
| Periungual dermatophytosis | 150 | 0 | 0 | 0.00 | 149 | 2 | 1 | 0.67 | 151 | 0 | 0 | 0.00 | 450 | 2 | 1 | 0.22 | 0.4983 | 1.0000 | 0.4967 |
| First dose | 150 | 0 | 0 | 0.00 | 149 | 1 | 1 | 0.67 | 151 | 0 | 0 | 0.00 | 450 | 1 | 1 | 0.22 | 0.4949 | 1.0000 | 0.4967 |
| Second dose | 148 | 0 | 0 | 0.00 | 145 | 1 | 1 | 0.69 | 147 | 0 | 0 | 0.00 | 440 | 1 | 1 | 0.23 | 0.4983 | 1.0000 | 0.4966 |
| Helicobacter infection | 150 | 0 | 0 | 0.00 | 149 | 1 | 1 | 0.67 | 151 | 0 | 0 | 0.00 | 450 | 1 | 1 | 0.22 | 0.4983 | 1.0000 | 0.4967 |
| First dose | 150 | 0 | 0 | 0.00 | 149 | 1 | 1 | 0.67 | 151 | 0 | 0 | 0.00 | 450 | 1 | 1 | 0.22 | 0.4983 | 1.0000 | 0.4967 |
| Second dose | 148 | 0 | 0 | 0.00 | 145 | 0 | 0 | 0.00 | 147 | 0 | 0 | 0.00 | 440 | 0 | 0 | 0.00 | 1.0000 | 1.0000 | 1.0000 |
| **Respiratory, thoracic and mediastinal disorders** | 150 | 6 | 6 | 4.00 | 149 | 5 | 4 | 2.68 | 151 | 3 | 3 | 1.99 | 450 | 14 | 13 | 2.89 | 0.7497 | 0.3355 | 0.7219 |
| First dose | 150 | 2 | 2 | 1.33 | 149 | 1 | 1 | 0.67 | 151 | 3 | 3 | 1.99 | 450 | 6 | 6 | 1.33 | 1.0000 | 1.0000 | 0.6225 |
| Second dose | 148 | 4 | 4 | 2.70 | 145 | 4 | 3 | 2.07 | 147 | 0 | 0 | 0.00 | 440 | 8 | 7 | 1.59 | 1.0000 | 0.1225 | 0.1212 |
| Cough | 150 | 2 | 2 | 1.33 | 149 | 0 | 0 | 0.00 | 151 | 1 | 1 | 0.66 | 450 | 3 | 3 | 0.67 | 0.4983 | 0.6225 | 1.0000 |
| First dose | 150 | 1 | 1 | 0.67 | 149 | 0 | 0 | 0.00 | 151 | 1 | 1 | 0.66 | 450 | 2 | 2 | 0.44 | 1.0000 | 1.0000 | 1.0000 |
| Second dose | 148 | 1 | 1 | 0.68 | 145 | 0 | 0 | 0.00 | 147 | 0 | 0 | 0.00 | 440 | 1 | 1 | 0.23 | 1.0000 | 1.0000 | 1.0000 |
| Rhinorrhoea | 150 | 1 | 1 | 0.67 | 149 | 1 | 1 | 0.67 | 151 | 1 | 1 | 0.66 | 450 | 3 | 3 | 0.67 | 1.0000 | 1.0000 | 1.0000 |
| First dose | 150 | 0 | 0 | 0.00 | 149 | 1 | 1 | 0.67 | 151 | 1 | 1 | 0.66 | 450 | 2 | 2 | 0.44 | 0.4983 | 1.0000 | 1.0000 |
| Second dose | 148 | 1 | 1 | 0.68 | 145 | 0 | 0 | 0.00 | 147 | 0 | 0 | 0.00 | 440 | 1 | 1 | 0.23 | 1.0000 | 1.0000 | 1.0000 |
| Throat irritation | 150 | 1 | 1 | 0.67 | 149 | 0 | 0 | 0.00 | 151 | 1 | 1 | 0.66 | 450 | 2 | 2 | 0.44 | 1.0000 | 1.0000 | 1.0000 |
| First dose | 150 | 0 | 0 | 0.00 | 149 | 0 | 0 | 0.00 | 151 | 1 | 1 | 0.66 | 450 | 1 | 1 | 0.22 | 1.0000 | 1.0000 | 1.0000 |
| Second dose | 148 | 1 | 1 | 0.68 | 145 | 0 | 0 | 0.00 | 147 | 0 | 0 | 0.00 | 440 | 1 | 1 | 0.23 | 1.0000 | 1.0000 | 1.0000 |
| Productive cough | 150 | 0 | 0 | 0.00 | 149 | 1 | 1 | 0.67 | 151 | 0 | 0 | 0.00 | 450 | 1 | 1 | 0.22 | 0.4983 | 1.0000 | 0.4967 |
| First dose | 150 | 0 | 0 | 0.00 | 149 | 0 | 0 | 0.00 | 151 | 0 | 0 | 0.00 | 450 | 0 | 0 | 0.00 | 1.0000 | 1.0000 | 1.0000 |
| Second dose | 148 | 0 | 0 | 0.00 | 145 | 1 | 1 | 0.69 | 147 | 0 | 0 | 0.00 | 440 | 1 | 1 | 0.23 | 0.4949 | 1.0000 | 0.4966 |
| Laryngeal mass | 150 | 0 | 0 | 0.00 | 149 | 1 | 1 | 0.67 | 151 | 0 | 0 | 0.00 | 450 | 1 | 1 | 0.22 | 0.4983 | 1.0000 | 0.4967 |
| First dose | 150 | 0 | 0 | 0.00 | 149 | 0 | 0 | 0.00 | 151 | 0 | 0 | 0.00 | 450 | 0 | 0 | 0.00 | 1.0000 | 1.0000 | 1.0000 |
| Second dose | 148 | 0 | 0 | 0.00 | 145 | 1 | 1 | 0.69 | 147 | 0 | 0 | 0.00 | 440 | 1 | 1 | 0.23 | 0.4949 | 1.0000 | 0.4966 |
| Chronic rhinosinusitis with nasal polyps | 150 | 0 | 0 | 0.00 | 149 | 1 | 1 | 0.67 | 151 | 0 | 0 | 0.00 | 450 | 1 | 1 | 0.22 | 0.4983 | 1.0000 | 0.4967 |
| First dose | 150 | 0 | 0 | 0.00 | 149 | 0 | 0 | 0.00 | 151 | 0 | 0 | 0.00 | 450 | 0 | 0 | 0.00 | 1.0000 | 1.0000 | 1.0000 |
| Second dose | 148 | 0 | 0 | 0.00 | 145 | 1 | 1 | 0.69 | 147 | 0 | 0 | 0.00 | 440 | 1 | 1 | 0.23 | 0.4949 | 1.0000 | 0.4966 |
| Lung mass | 150 | 1 | 1 | 0.67 | 149 | 0 | 0 | 0.00 | 151 | 0 | 0 | 0.00 | 450 | 1 | 1 | 0.22 | 1.0000 | 0.4983 | 1.0000 |
| First dose | 150 | 0 | 0 | 0.00 | 149 | 0 | 0 | 0.00 | 151 | 0 | 0 | 0.00 | 450 | 0 | 0 | 0.00 | 1.0000 | 1.0000 | 1.0000 |
| Second dose | 148 | 1 | 1 | 0.68 | 145 | 0 | 0 | 0.00 | 147 | 0 | 0 | 0.00 | 440 | 1 | 1 | 0.23 | 1.0000 | 1.0000 | 1.0000 |
| Anaphylactic rhinitis | 150 | 1 | 1 | 0.67 | 149 | 0 | 0 | 0.00 | 151 | 0 | 0 | 0.00 | 450 | 1 | 1 | 0.22 | 1.0000 | 0.4983 | 1.0000 |
| First dose | 150 | 1 | 1 | 0.67 | 149 | 0 | 0 | 0.00 | 151 | 0 | 0 | 0.00 | 450 | 1 | 1 | 0.22 | 1.0000 | 0.4983 | 1.0000 |
| Second dose | 148 | 0 | 0 | 0.00 | 145 | 0 | 0 | 0.00 | 147 | 0 | 0 | 0.00 | 440 | 0 | 0 | 0.00 | 1.0000 | 1.0000 | 1.0000 |
| Nasal congestion | 150 | 0 | 0 | 0.00 | 149 | 1 | 1 | 0.67 | 151 | 0 | 0 | 0.00 | 450 | 1 | 1 | 0.22 | 0.4983 | 1.0000 | 0.4967 |
| First dose | 150 | 0 | 0 | 0.00 | 149 | 0 | 0 | 0.00 | 151 | 0 | 0 | 0.00 | 450 | 0 | 0 | 0.00 | 1.0000 | 1.0000 | 1.0000 |
| Second dose | 148 | 0 | 0 | 0.00 | 145 | 1 | 1 | 0.69 | 147 | 0 | 0 | 0.00 | 440 | 1 | 1 | 0.23 | 0.4949 | 1.0000 | 0.4966 |
| **Skin and subcutaneous tissue disorders** | 150 | 7 | 6 | 4.00 | 149 | 7 | 4 | 2.68 | 151 | 2 | 2 | 1.32 | 450 | 16 | 12 | 2.67 | 0.7497 | 0.1731 | 0.4460 |
| First dose | 150 | 4 | 3 | 2.00 | 149 | 5 | 3 | 2.01 | 151 | 2 | 2 | 1.32 | 450 | 11 | 8 | 1.78 | 1.0000 | 0.6844 | 0.6833 |
| Second dose | 148 | 3 | 3 | 2.03 | 145 | 2 | 1 | 0.69 | 147 | 0 | 0 | 0.00 | 440 | 5 | 4 | 0.91 | 0.6225 | 0.2475 | 0.4966 |
| Rash | 150 | 3 | 3 | 2.00 | 149 | 1 | 1 | 0.67 | 151 | 1 | 1 | 0.66 | 450 | 5 | 5 | 1.11 | 0.6225 | 0.3708 | 1.0000 |
| First dose | 150 | 1 | 1 | 0.67 | 149 | 1 | 1 | 0.67 | 151 | 1 | 1 | 0.66 | 450 | 3 | 3 | 0.67 | 1.0000 | 1.0000 | 1.0000 |
| Second dose | 148 | 2 | 2 | 1.35 | 145 | 0 | 0 | 0.00 | 147 | 0 | 0 | 0.00 | 440 | 2 | 2 | 0.45 | 0.4983 | 0.4983 | 1.0000 |
| Itch | 150 | 1 | 1 | 0.67 | 149 | 2 | 1 | 0.67 | 151 | 0 | 0 | 0.00 | 450 | 3 | 2 | 0.44 | 1.0000 | 0.4983 | 0.4967 |
| First dose | 150 | 1 | 1 | 0.67 | 149 | 0 | 0 | 0.00 | 151 | 0 | 0 | 0.00 | 450 | 1 | 1 | 0.22 | 1.0000 | 0.4983 | 1.0000 |
| Second dose | 148 | 0 | 0 | 0.00 | 145 | 2 | 1 | 0.69 | 147 | 0 | 0 | 0.00 | 440 | 2 | 1 | 0.23 | 0.4949 | 1.0000 | 0.4966 |
| Allergic dermatitis | 150 | 1 | 1 | 0.67 | 149 | 0 | 0 | 0.00 | 151 | 1 | 1 | 0.66 | 450 | 2 | 2 | 0.44 | 1.0000 | 1.0000 | 1.0000 |
| First dose | 150 | 1 | 1 | 0.67 | 149 | 0 | 0 | 0.00 | 151 | 1 | 1 | 0.66 | 450 | 2 | 2 | 0.44 | 1.0000 | 1.0000 | 1.0000 |
| Second dose | 148 | 0 | 0 | 0.00 | 145 | 0 | 0 | 0.00 | 147 | 0 | 0 | 0.00 | 440 | 0 | 0 | 0.00 | 1.0000 | 1.0000 | 1.0000 |
| Eczema | 150 | 0 | 0 | 0.00 | 149 | 1 | 1 | 0.67 | 151 | 0 | 0 | 0.00 | 450 | 1 | 1 | 0.22 | 0.4983 | 1.0000 | 0.4967 |
| First dose | 150 | 0 | 0 | 0.00 | 149 | 1 | 1 | 0.67 | 151 | 0 | 0 | 0.00 | 450 | 1 | 1 | 0.22 | 0.4983 | 1.0000 | 0.4967 |
| Second dose | 148 | 0 | 0 | 0.00 | 145 | 0 | 0 | 0.00 | 147 | 0 | 0 | 0.00 | 440 | 0 | 0 | 0.00 | 1.0000 | 1.0000 | 1.0000 |
| Pruritic rash | 150 | 1 | 1 | 0.67 | 149 | 0 | 0 | 0.00 | 151 | 0 | 0 | 0.00 | 450 | 1 | 1 | 0.22 | 1.0000 | 0.4983 | 1.0000 |
| First dose | 150 | 1 | 1 | 0.67 | 149 | 0 | 0 | 0.00 | 151 | 0 | 0 | 0.00 | 450 | 1 | 1 | 0.22 | 1.0000 | 0.4983 | 1.0000 |
| Second dose | 148 | 0 | 0 | 0.00 | 145 | 0 | 0 | 0.00 | 147 | 0 | 0 | 0.00 | 440 | 0 | 0 | 0.00 | 1.0000 | 1.0000 | 1.0000 |
| Skin burning sensation | 150 | 0 | 0 | 0.00 | 149 | 2 | 1 | 0.67 | 151 | 0 | 0 | 0.00 | 450 | 2 | 1 | 0.22 | 0.4983 | 1.0000 | 0.4967 |
| First dose | 150 | 0 | 0 | 0.00 | 149 | 2 | 1 | 0.67 | 151 | 0 | 0 | 0.00 | 450 | 2 | 1 | 0.22 | 0.4983 | 1.0000 | 0.4967 |
| Second dose | 148 | 0 | 0 | 0.00 | 145 | 0 | 0 | 0.00 | 147 | 0 | 0 | 0.00 | 440 | 0 | 0 | 0.00 | 1.0000 | 1.0000 | 1.0000 |
| Urticaria | 150 | 1 | 1 | 0.67 | 149 | 0 | 0 | 0.00 | 151 | 0 | 0 | 0.00 | 450 | 1 | 1 | 0.22 | 1.0000 | 0.4983 | 1.0000 |
| First dose | 150 | 0 | 0 | 0.00 | 149 | 0 | 0 | 0.00 | 151 | 0 | 0 | 0.00 | 450 | 0 | 0 | 0.00 | 1.0000 | 1.0000 | 1.0000 |
| Second dose | 148 | 1 | 1 | 0.68 | 145 | 0 | 0 | 0.00 | 147 | 0 | 0 | 0.00 | 440 | 1 | 1 | 0.23 | 1.0000 | 1.0000 | 1.0000 |
| Henoch-Schönlein purpura | 150 | 0 | 0 | 0.00 | 149 | 1 | 1 | 0.67 | 151 | 0 | 0 | 0.00 | 450 | 1 | 1 | 0.22 | 0.4983 | 1.0000 | 0.4967 |
| First dose | 150 | 0 | 0 | 0.00 | 149 | 1 | 1 | 0.67 | 151 | 0 | 0 | 0.00 | 450 | 1 | 1 | 0.22 | 0.4983 | 1.0000 | 0.4967 |
| Second dose | 148 | 0 | 0 | 0.00 | 145 | 0 | 0 | 0.00 | 147 | 0 | 0 | 0.00 | 440 | 0 | 0 | 0.00 | 1.0000 | 1.0000 | 1.0000 |
| **Immune system disorders** | 150 | 2 | 2 | 1.33 | 149 | 1 | 1 | 0.67 | 151 | 3 | 3 | 1.99 | 450 | 6 | 6 | 1.33 | 1.0000 | 1.0000 | 0.6225 |
| First dose | 150 | 1 | 1 | 0.67 | 149 | 0 | 0 | 0.00 | 151 | 1 | 1 | 0.66 | 450 | 2 | 2 | 0.44 | 1.0000 | 1.0000 | 1.0000 |
| Second dose | 148 | 1 | 1 | 0.68 | 145 | 1 | 1 | 0.69 | 147 | 2 | 2 | 1.36 | 440 | 4 | 4 | 0.91 | 1.0000 | 0.6224 | 1.0000 |
| Hypersensitivity | 150 | 2 | 2 | 1.33 | 149 | 1 | 1 | 0.67 | 151 | 3 | 3 | 1.99 | 450 | 6 | 6 | 1.33 | 1.0000 | 1.0000 | 0.6225 |
| First dose | 150 | 1 | 1 | 0.67 | 149 | 0 | 0 | 0.00 | 151 | 1 | 1 | 0.66 | 450 | 2 | 2 | 0.44 | 1.0000 | 1.0000 | 1.0000 |
| Second dose | 148 | 1 | 1 | 0.68 | 145 | 1 | 1 | 0.69 | 147 | 2 | 2 | 1.36 | 440 | 4 | 4 | 0.91 | 1.0000 | 0.6224 | 1.0000 |
| **Metabolism and nutrition disorders** | 150 | 0 | 0 | 0.00 | 149 | 4 | 2 | 1.34 | 151 | 5 | 3 | 1.99 | 450 | 9 | 5 | 1.11 | 0.2475 | 0.2475 | 0.6225 |
| First dose | 150 | 0 | 0 | 0.00 | 149 | 3 | 1 | 0.67 | 151 | 5 | 3 | 1.99 | 450 | 8 | 4 | 0.89 | 0.4983 | 0.2475 | 1.0000 |
| Second dose | 148 | 0 | 0 | 0.00 | 145 | 1 | 1 | 0.69 | 147 | 0 | 0 | 0.00 | 440 | 1 | 1 | 0.23 | 0.4949 | 1.0000 | 0.6225 |
| Hyperlipidaemia | 150 | 0 | 0 | 0.00 | 149 | 2 | 2 | 1.34 | 151 | 0 | 0 | 0.00 | 450 | 2 | 2 | 0.44 | 0.2475 | 1.0000 | 0.4966 |
| First dose | 150 | 0 | 0 | 0.00 | 149 | 1 | 1 | 0.67 | 151 | 0 | 0 | 0.00 | 450 | 1 | 1 | 0.22 | 0.4983 | 1.0000 | 0.2458 |
| Second dose | 148 | 0 | 0 | 0.00 | 145 | 1 | 1 | 0.69 | 147 | 0 | 0 | 0.00 | 440 | 1 | 1 | 0.23 | 0.4949 | 1.0000 | 0.4967 |
| Type 2 diabetes mellitus | 150 | 0 | 0 | 0.00 | 149 | 1 | 1 | 0.67 | 151 | 0 | 0 | 0.00 | 450 | 1 | 1 | 0.22 | 0.4983 | 1.0000 | 0.4966 |
| First dose | 150 | 0 | 0 | 0.00 | 149 | 1 | 1 | 0.67 | 151 | 0 | 0 | 0.00 | 450 | 1 | 1 | 0.22 | 0.4983 | 1.0000 | 0.4967 |
| Second dose | 148 | 0 | 0 | 0.00 | 145 | 0 | 0 | 0.00 | 147 | 0 | 0 | 0.00 | 440 | 0 | 0 | 0.00 | 1.0000 | 1.0000 | 1.0000 |
| Hypoproteinaemia | 150 | 0 | 0 | 0.00 | 149 | 0 | 0 | 0.00 | 151 | 1 | 1 | 0.66 | 450 | 1 | 1 | 0.22 | 1.0000 | 1.0000 | 0.4967 |
| First dose | 150 | 0 | 0 | 0.00 | 149 | 0 | 0 | 0.00 | 151 | 1 | 1 | 0.66 | 450 | 1 | 1 | 0.22 | 1.0000 | 1.0000 | 1.0000 |
| Second dose | 148 | 0 | 0 | 0.00 | 145 | 0 | 0 | 0.00 | 147 | 0 | 0 | 0.00 | 440 | 0 | 0 | 0.00 | 1.0000 | 1.0000 | 1.0000 |
| Hypokalaemia | 150 | 0 | 0 | 0.00 | 149 | 1 | 1 | 0.67 | 151 | 0 | 0 | 0.00 | 450 | 1 | 1 | 0.22 | 0.4983 | 1.0000 | 0.4967 |
| First dose | 150 | 0 | 0 | 0.00 | 149 | 1 | 1 | 0.67 | 151 | 0 | 0 | 0.00 | 450 | 1 | 1 | 0.22 | 0.4983 | 1.0000 | 0.4967 |
| Second dose | 148 | 0 | 0 | 0.00 | 145 | 0 | 0 | 0.00 | 147 | 0 | 0 | 0.00 | 440 | 0 | 0 | 0.00 | 1.0000 | 1.0000 | 1.0000 |
| Gout | 150 | 0 | 0 | 0.00 | 149 | 0 | 0 | 0.00 | 151 | 1 | 1 | 0.66 | 450 | 1 | 1 | 0.22 | 1.0000 | 1.0000 | 1.0000 |
| First dose | 150 | 0 | 0 | 0.00 | 149 | 0 | 0 | 0.00 | 151 | 1 | 1 | 0.66 | 450 | 1 | 1 | 0.22 | 1.0000 | 1.0000 | 1.0000 |
| Second dose | 148 | 0 | 0 | 0.00 | 145 | 0 | 0 | 0.00 | 147 | 0 | 0 | 0.00 | 440 | 0 | 0 | 0.00 | 1.0000 | 1.0000 | 1.0000 |
| Diabetes mellitus | 150 | 0 | 0 | 0.00 | 149 | 0 | 0 | 0.00 | 151 | 1 | 1 | 0.66 | 450 | 1 | 1 | 0.22 | 1.0000 | 1.0000 | 1.0000 |
| First dose | 150 | 0 | 0 | 0.00 | 149 | 0 | 0 | 0.00 | 151 | 1 | 1 | 0.66 | 450 | 1 | 1 | 0.22 | 1.0000 | 1.0000 | 1.0000 |
| Second dose | 148 | 0 | 0 | 0.00 | 145 | 0 | 0 | 0.00 | 147 | 0 | 0 | 0.00 | 440 | 0 | 0 | 0.00 | 1.0000 | 1.0000 | 1.0000 |
| Impaired glucose tolerance | 150 | 0 | 0 | 0.00 | 149 | 0 | 0 | 0.00 | 151 | 1 | 1 | 0.66 | 450 | 1 | 1 | 0.22 | 1.0000 | 1.0000 | 1.0000 |
| First dose | 150 | 0 | 0 | 0.00 | 149 | 0 | 0 | 0.00 | 151 | 1 | 1 | 0.66 | 450 | 1 | 1 | 0.22 | 1.0000 | 1.0000 | 1.0000 |
| Second dose | 148 | 0 | 0 | 0.00 | 145 | 0 | 0 | 0.00 | 147 | 0 | 0 | 0.00 | 440 | 0 | 0 | 0.00 | 1.0000 | 1.0000 | 1.0000 |
| Hyperkalaemia | 150 | 0 | 0 | 0.00 | 149 | 0 | 0 | 0.00 | 151 | 1 | 1 | 0.66 | 450 | 1 | 1 | 0.22 | 1.0000 | 1.0000 | 1.0000 |
| First dose | 150 | 0 | 0 | 0.00 | 149 | 0 | 0 | 0.00 | 151 | 1 | 1 | 0.66 | 450 | 1 | 1 | 0.22 | 1.0000 | 1.0000 | 1.0000 |
| Second dose | 148 | 0 | 0 | 0.00 | 145 | 0 | 0 | 0.00 | 147 | 0 | 0 | 0.00 | 440 | 0 | 0 | 0.00 | 1.0000 | 1.0000 | 1.0000 |
| **Injury, poisoning and procedural complications** | 150 | 0 | 0 | 0.00 | 149 | 2 | 2 | 1.34 | 151 | 2 | 2 | 1.32 | 450 | 4 | 4 | 0.89 | 0.2475 | 0.4983 | 1.0000 |
| First dose | 150 | 0 | 0 | 0.00 | 149 | 0 | 0 | 0.00 | 151 | 1 | 1 | 0.66 | 450 | 1 | 1 | 0.22 | 1.0000 | 1.0000 | 1.0000 |
| Second dose | 148 | 0 | 0 | 0.00 | 145 | 2 | 2 | 1.38 | 147 | 1 | 1 | 0.68 | 440 | 3 | 3 | 0.68 | 0.2441 | 0.4983 | 0.6211 |
| Ligament sprain | 150 | 0 | 0 | 0.00 | 149 | 1 | 1 | 0.67 | 151 | 1 | 1 | 0.66 | 450 | 2 | 2 | 0.44 | 0.4983 | 1.0000 | 1.0000 |
| First dose | 150 | 0 | 0 | 0.00 | 149 | 0 | 0 | 0.00 | 151 | 0 | 0 | 0.00 | 450 | 0 | 0 | 0.00 | 1.0000 | 1.0000 | 1.0000 |
| Second dose | 148 | 0 | 0 | 0.00 | 145 | 1 | 1 | 0.69 | 147 | 1 | 1 | 0.68 | 440 | 2 | 2 | 0.45 | 0.4949 | 0.4983 | 1.0000 |
| Animal bite | 150 | 0 | 0 | 0.00 | 149 | 0 | 0 | 0.00 | 151 | 1 | 1 | 0.66 | 450 | 1 | 1 | 0.22 | 1.0000 | 1.0000 | 1.0000 |
| First dose | 150 | 0 | 0 | 0.00 | 149 | 0 | 0 | 0.00 | 151 | 1 | 1 | 0.66 | 450 | 1 | 1 | 0.22 | 1.0000 | 1.0000 | 1.0000 |
| Second dose | 148 | 0 | 0 | 0.00 | 145 | 0 | 0 | 0.00 | 147 | 0 | 0 | 0.00 | 440 | 0 | 0 | 0.00 | 1.0000 | 1.0000 | 1.0000 |
| Cervical nerve root injury | 150 | 0 | 0 | 0.00 | 149 | 1 | 1 | 0.67 | 151 | 0 | 0 | 0.00 | 450 | 1 | 1 | 0.22 | 0.4983 | 1.0000 | 0.4967 |
| First dose | 150 | 0 | 0 | 0.00 | 149 | 0 | 0 | 0.00 | 151 | 0 | 0 | 0.00 | 450 | 0 | 0 | 0.00 | 1.0000 | 1.0000 | 1.0000 |
| Second dose | 148 | 0 | 0 | 0.00 | 145 | 1 | 1 | 0.69 | 147 | 0 | 0 | 0.00 | 440 | 1 | 1 | 0.23 | 0.4949 | 1.0000 | 0.4966 |
| **Eye disorders** | 150 | 2 | 1 | 0.67 | 149 | 1 | 1 | 0.67 | 151 | 3 | 2 | 1.32 | 450 | 6 | 4 | 0.89 | 1.0000 | 1.0000 | 1.0000 |
| First dose | 150 | 0 | 0 | 0.00 | 149 | 1 | 1 | 0.67 | 151 | 3 | 2 | 1.32 | 450 | 4 | 3 | 0.67 | 0.4983 | 0.4983 | 1.0000 |
| Second dose | 148 | 2 | 1 | 0.68 | 145 | 0 | 0 | 0.00 | 147 | 0 | 0 | 0.00 | 440 | 2 | 1 | 0.23 | 1.0000 | 1.0000 | 1.0000 |
| Vitreous floaters | 150 | 0 | 0 | 0.00 | 149 | 0 | 0 | 0.00 | 151 | 1 | 1 | 0.66 | 450 | 1 | 1 | 0.22 | 1.0000 | 1.0000 | 1.0000 |
| First dose | 150 | 0 | 0 | 0.00 | 149 | 0 | 0 | 0.00 | 151 | 1 | 1 | 0.66 | 450 | 1 | 1 | 0.22 | 1.0000 | 1.0000 | 1.0000 |
| Second dose | 148 | 0 | 0 | 0.00 | 145 | 0 | 0 | 0.00 | 147 | 0 | 0 | 0.00 | 440 | 0 | 0 | 0.00 | 1.0000 | 1.0000 | 1.0000 |
| Cataract | 150 | 0 | 0 | 0.00 | 149 | 0 | 0 | 0.00 | 151 | 1 | 1 | 0.66 | 450 | 1 | 1 | 0.22 | 1.0000 | 1.0000 | 1.0000 |
| First dose | 150 | 0 | 0 | 0.00 | 149 | 0 | 0 | 0.00 | 151 | 1 | 1 | 0.66 | 450 | 1 | 1 | 0.22 | 1.0000 | 1.0000 | 1.0000 |
| Second dose | 148 | 0 | 0 | 0.00 | 145 | 0 | 0 | 0.00 | 147 | 0 | 0 | 0.00 | 440 | 0 | 0 | 0.00 | 1.0000 | 1.0000 | 1.0000 |
| Conjunctival hyperaemia | 150 | 0 | 0 | 0.00 | 149 | 1 | 1 | 0.67 | 151 | 0 | 0 | 0.00 | 450 | 1 | 1 | 0.22 | 0.4983 | 1.0000 | 0.4967 |
| First dose | 150 | 0 | 0 | 0.00 | 149 | 1 | 1 | 0.67 | 151 | 0 | 0 | 0.00 | 450 | 1 | 1 | 0.22 | 0.4983 | 1.0000 | 0.4967 |
| Second dose | 148 | 0 | 0 | 0.00 | 145 | 0 | 0 | 0.00 | 147 | 0 | 0 | 0.00 | 440 | 0 | 0 | 0.00 | 1.0000 | 1.0000 | 1.0000 |
| Eye pruritus | 150 | 1 | 1 | 0.67 | 149 | 0 | 0 | 0.00 | 151 | 0 | 0 | 0.00 | 450 | 1 | 1 | 0.22 | 1.0000 | 0.4983 | 1.0000 |
| First dose | 150 | 0 | 0 | 0.00 | 149 | 0 | 0 | 0.00 | 151 | 0 | 0 | 0.00 | 450 | 0 | 0 | 0.00 | 1.0000 | 1.0000 | 1.0000 |
| Second dose | 148 | 1 | 1 | 0.68 | 145 | 0 | 0 | 0.00 | 147 | 0 | 0 | 0.00 | 440 | 1 | 1 | 0.23 | 1.0000 | 1.0000 | 1.0000 |
| Eye swelling | 150 | 1 | 1 | 0.67 | 149 | 0 | 0 | 0.00 | 151 | 0 | 0 | 0.00 | 450 | 1 | 1 | 0.22 | 1.0000 | 0.4983 | 1.0000 |
| First dose | 150 | 0 | 0 | 0.00 | 149 | 0 | 0 | 0.00 | 151 | 0 | 0 | 0.00 | 450 | 0 | 0 | 0.00 | 1.0000 | 1.0000 | 1.0000 |
| Second dose | 148 | 1 | 1 | 0.68 | 145 | 0 | 0 | 0.00 | 147 | 0 | 0 | 0.00 | 440 | 1 | 1 | 0.23 | 1.0000 | 1.0000 | 1.0000 |
| Macular hole | 150 | 0 | 0 | 0.00 | 149 | 0 | 0 | 0.00 | 151 | 1 | 1 | 0.66 | 450 | 1 | 1 | 0.22 | 1.0000 | 1.0000 | 1.0000 |
| First dose | 150 | 0 | 0 | 0.00 | 149 | 0 | 0 | 0.00 | 151 | 1 | 1 | 0.66 | 450 | 1 | 1 | 0.22 | 1.0000 | 1.0000 | 1.0000 |
| Second dose | 148 | 0 | 0 | 0.00 | 145 | 0 | 0 | 0.00 | 147 | 0 | 0 | 0.00 | 440 | 0 | 0 | 0.00 | 1.0000 | 1.0000 | 1.0000 |
| **Psychiatric disorders** | 150 | 2 | 2 | 1.33 | 149 | 1 | 1 | 0.67 | 151 | 1 | 1 | 0.66 | 450 | 4 | 4 | 0.89 | 1.0000 | 0.6225 | 1.0000 |
| First dose | 150 | 1 | 1 | 0.67 | 149 | 1 | 1 | 0.67 | 151 | 1 | 1 | 0.66 | 450 | 3 | 3 | 0.67 | 1.0000 | 1.0000 | 1.0000 |
| Second dose | 148 | 1 | 1 | 0.68 | 145 | 0 | 0 | 0.00 | 147 | 0 | 0 | 0.00 | 440 | 1 | 1 | 0.23 | 1.0000 | 1.0000 | 1.0000 |
| Insomnia | 150 | 1 | 1 | 0.67 | 149 | 0 | 0 | 0.00 | 151 | 1 | 1 | 0.66 | 450 | 2 | 2 | 0.44 | 1.0000 | 1.0000 | 1.0000 |
| First dose | 150 | 1 | 1 | 0.67 | 149 | 0 | 0 | 0.00 | 151 | 1 | 1 | 0.66 | 450 | 2 | 2 | 0.44 | 1.0000 | 1.0000 | 1.0000 |
| Second dose | 148 | 0 | 0 | 0.00 | 145 | 0 | 0 | 0.00 | 147 | 0 | 0 | 0.00 | 440 | 0 | 0 | 0.00 | 1.0000 | 1.0000 | 1.0000 |
| Poor sleep quality | 150 | 0 | 0 | 0.00 | 149 | 1 | 1 | 0.67 | 151 | 0 | 0 | 0.00 | 450 | 1 | 1 | 0.22 | 0.4983 | 1.0000 | 0.4967 |
| First dose | 150 | 0 | 0 | 0.00 | 149 | 1 | 1 | 0.67 | 151 | 0 | 0 | 0.00 | 450 | 1 | 1 | 0.22 | 0.4983 | 1.0000 | 0.4967 |
| Second dose | 148 | 0 | 0 | 0.00 | 145 | 0 | 0 | 0.00 | 147 | 0 | 0 | 0.00 | 440 | 0 | 0 | 0.00 | 1.0000 | 1.0000 | 1.0000 |
| Agitation | 150 | 1 | 1 | 0.67 | 149 | 0 | 0 | 0.00 | 151 | 0 | 0 | 0.00 | 450 | 1 | 1 | 0.22 | 1.0000 | 0.4983 | 1.0000 |
| First dose | 150 | 0 | 0 | 0.00 | 149 | 0 | 0 | 0.00 | 151 | 0 | 0 | 0.00 | 450 | 0 | 0 | 0.00 | 1.0000 | 1.0000 | 1.0000 |
| Second dose | 148 | 1 | 1 | 0.68 | 145 | 0 | 0 | 0.00 | 147 | 0 | 0 | 0.00 | 440 | 1 | 1 | 0.23 | 1.0000 | 1.0000 | 1.0000 |
| **Renal and urinary disorders** | 150 | 1 | 1 | 0.67 | 149 | 0 | 0 | 0.00 | 151 | 1 | 1 | 0.66 | 450 | 2 | 2 | 0.44 | 1.0000 | 1.0000 | 1.0000 |
| First dose | 150 | 1 | 1 | 0.67 | 149 | 0 | 0 | 0.00 | 151 | 1 | 1 | 0.66 | 450 | 2 | 2 | 0.44 | 1.0000 | 1.0000 | 1.0000 |
| Second dose | 148 | 0 | 0 | 0.00 | 145 | 0 | 0 | 0.00 | 147 | 0 | 0 | 0.00 | 440 | 0 | 0 | 0.00 | 1.0000 | 1.0000 | 1.0000 |
| Membranous glomerulonephritis | 150 | 0 | 0 | 0.00 | 149 | 0 | 0 | 0.00 | 151 | 1 | 1 | 0.66 | 450 | 1 | 1 | 0.22 | 1.0000 | 1.0000 | 1.0000 |
| First dose | 150 | 0 | 0 | 0.00 | 149 | 0 | 0 | 0.00 | 151 | 1 | 1 | 0.66 | 450 | 1 | 1 | 0.22 | 1.0000 | 1.0000 | 1.0000 |
| Second dose | 148 | 0 | 0 | 0.00 | 145 | 0 | 0 | 0.00 | 147 | 0 | 0 | 0.00 | 440 | 0 | 0 | 0.00 | 1.0000 | 1.0000 | 1.0000 |
| Haematuria | 150 | 1 | 1 | 0.67 | 149 | 0 | 0 | 0.00 | 151 | 0 | 0 | 0.00 | 450 | 1 | 1 | 0.22 | 1.0000 | 0.4983 | 1.0000 |
| First dose | 150 | 1 | 1 | 0.67 | 149 | 0 | 0 | 0.00 | 151 | 0 | 0 | 0.00 | 450 | 1 | 1 | 0.22 | 1.0000 | 0.4983 | 1.0000 |
| Second dose | 148 | 0 | 0 | 0.00 | 145 | 0 | 0 | 0.00 | 147 | 0 | 0 | 0.00 | 440 | 0 | 0 | 0.00 | 1.0000 | 1.0000 | 1.0000 |
| **Investigations** | 150 | 0 | 0 | 0.00 | 149 | 1 | 1 | 0.67 | 151 | 0 | 0 | 0.00 | 450 | 1 | 1 | 0.22 | 0.4983 | 1.0000 | 0.4967 |
| First dose | 150 | 0 | 0 | 0.00 | 149 | 0 | 0 | 0.00 | 151 | 0 | 0 | 0.00 | 450 | 0 | 0 | 0.00 | 1.0000 | 1.0000 | 1.0000 |
| Second dose | 148 | 0 | 0 | 0.00 | 145 | 1 | 1 | 0.69 | 147 | 0 | 0 | 0.00 | 440 | 1 | 1 | 0.23 | 0.4949 | 1.0000 | 0.4966 |
| Grip strength decreased | 150 | 0 | 0 | 0.00 | 149 | 1 | 1 | 0.67 | 151 | 0 | 0 | 0.00 | 450 | 1 | 1 | 0.22 | 0.4983 | 1.0000 | 0.4967 |
| First dose | 150 | 0 | 0 | 0.00 | 149 | 0 | 0 | 0.00 | 151 | 0 | 0 | 0.00 | 450 | 0 | 0 | 0.00 | 1.0000 | 1.0000 | 1.0000 |
| Second dose | 148 | 0 | 0 | 0.00 | 145 | 1 | 1 | 0.69 | 147 | 0 | 0 | 0.00 | 440 | 1 | 1 | 0.23 | 0.4949 | 1.0000 | 0.4966 |
| **Reproductive system and breast disorders** | 150 | 1 | 1 | 0.67 | 149 | 0 | 0 | 0.00 | 151 | 0 | 0 | 0.00 | 450 | 1 | 1 | 0.22 | 1.0000 | 0.4983 | 1.0000 |
| First dose | 150 | 1 | 1 | 0.67 | 149 | 0 | 0 | 0.00 | 151 | 0 | 0 | 0.00 | 450 | 1 | 1 | 0.22 | 1.0000 | 0.4983 | 1.0000 |
| Second dose | 148 | 0 | 0 | 0.00 | 145 | 0 | 0 | 0.00 | 147 | 0 | 0 | 0.00 | 440 | 0 | 0 | 0.00 | 1.0000 | 1.0000 | 1.0000 |
| Menorrhagia | 150 | 1 | 1 | 0.67 | 149 | 0 | 0 | 0.00 | 151 | 0 | 0 | 0.00 | 450 | 1 | 1 | 0.22 | 1.0000 | 0.4983 | 1.0000 |
| First dose | 150 | 1 | 1 | 0.67 | 149 | 0 | 0 | 0.00 | 151 | 0 | 0 | 0.00 | 450 | 1 | 1 | 0.22 | 1.0000 | 0.4983 | 1.0000 |
| Second dose | 148 | 0 | 0 | 0.00 | 145 | 0 | 0 | 0.00 | 147 | 0 | 0 | 0.00 | 440 | 0 | 0 | 0.00 | 1.0000 | 1.0000 | 1.0000 |
| **Hepatobiliary disorders** | 150 | 0 | 0 | 0.00 | 149 | 1 | 1 | 0.67 | 151 | 0 | 0 | 0.00 | 450 | 1 | 1 | 0.22 | 0.4983 | 1.0000 | 0.4967 |
| First dose | 150 | 0 | 0 | 0.00 | 149 | 0 | 0 | 0.00 | 151 | 0 | 0 | 0.00 | 450 | 0 | 0 | 0.00 | 1.0000 | 1.0000 | 1.0000 |
| Second dose | 148 | 0 | 0 | 0.00 | 145 | 1 | 1 | 0.69 | 147 | 0 | 0 | 0.00 | 440 | 1 | 1 | 0.23 | 0.4949 | 1.0000 | 0.4966 |
| Hepatic failure | 150 | 0 | 0 | 0.00 | 149 | 1 | 1 | 0.67 | 151 | 0 | 0 | 0.00 | 450 | 1 | 1 | 0.22 | 0.4983 | 1.0000 | 0.4967 |
| First dose | 150 | 0 | 0 | 0.00 | 149 | 0 | 0 | 0.00 | 151 | 0 | 0 | 0.00 | 450 | 0 | 0 | 0.00 | 1.0000 | 1.0000 | 1.0000 |
| Second dose | 148 | 0 | 0 | 0.00 | 145 | 1 | 1 | 0.69 | 147 | 0 | 0 | 0.00 | 440 | 1 | 1 | 0.23 | 0.4949 | 1.0000 | 0.4966 |
| **Neoplasms benign, malignant and unspecified (incl cysts and polyps)** | 150 | 0 | 0 | 0.00 | 149 | 1 | 1 | 0.67 | 151 | 0 | 0 | 0.00 | 450 | 1 | 1 | 0.22 | 0.4983 | 1.0000 | 0.4967 |
| First dose | 150 | 0 | 0 | 0.00 | 149 | 0 | 0 | 0.00 | 151 | 0 | 0 | 0.00 | 450 | 0 | 0 | 0.00 | 1.0000 | 1.0000 | 1.0000 |
| Second dose | 148 | 0 | 0 | 0.00 | 145 | 1 | 1 | 0.69 | 147 | 0 | 0 | 0.00 | 440 | 1 | 1 | 0.23 | 0.4949 | 1.0000 | 0.4966 |
| Benign thyroid neoplasm | 150 | 0 | 0 | 0.00 | 149 | 1 | 1 | 0.67 | 151 | 0 | 0 | 0.00 | 450 | 1 | 1 | 0.22 | 0.4983 | 1.0000 | 0.4967 |
| First dose | 150 | 0 | 0 | 0.00 | 149 | 0 | 0 | 0.00 | 151 | 0 | 0 | 0.00 | 450 | 0 | 0 | 0.00 | 1.0000 | 1.0000 | 1.0000 |
| Second dose | 148 | 0 | 0 | 0.00 | 145 | 1 | 1 | 0.69 | 147 | 0 | 0 | 0.00 | 440 | 1 | 1 | 0.23 | 0.4949 | 1.0000 | 0.4966 |
| **Vascular disorders** | 150 | 1 | 1 | 0.67 | 149 | 0 | 0 | 0.00 | 151 | 0 | 0 | 0.00 | 450 | 1 | 1 | 0.22 | 1.0000 | 0.4983 | 1.0000 |
| First dose | 150 | 0 | 0 | 0.00 | 149 | 0 | 0 | 0.00 | 151 | 0 | 0 | 0.00 | 450 | 0 | 0 | 0.00 | 1.0000 | 1.0000 | 1.0000 |
| Second dose | 148 | 1 | 1 | 0.68 | 145 | 0 | 0 | 0.00 | 147 | 0 | 0 | 0.00 | 440 | 1 | 1 | 0.23 | 1.0000 | 1.0000 | 1.0000 |
| Aortic arteriosclerosis | 150 | 1 | 1 | 0.67 | 149 | 0 | 0 | 0.00 | 151 | 0 | 0 | 0.00 | 450 | 1 | 1 | 0.22 | 1.0000 | 0.4983 | 1.0000 |
| First dose | 150 | 0 | 0 | 0.00 | 149 | 0 | 0 | 0.00 | 151 | 0 | 0 | 0.00 | 450 | 0 | 0 | 0.00 | 1.0000 | 1.0000 | 1.0000 |
| Second dose | 148 | 1 | 1 | 0.68 | 145 | 0 | 0 | 0.00 | 147 | 0 | 0 | 0.00 | 440 | 1 | 1 | 0.23 | 1.0000 | 1.0000 | 1.0000 |
| [1] *P*-values were calculated using Fisher's exact test.  [2] N = number of participants in the safety set for each dose. The incidence of adverse events for each dose is calculated using the safety set population of the corresponding dose as the denominator.  [3] nAE = number of adverse events.  [4] n = number of participants who reported adverse events.  [5] % = the percentage of participants who reported adverse events in each group. Adverse events were coded according to MedDRA version 25.1. | | | | | | | | | | | | | | | | | | | |

**[Table S4. Vaccine-related adverse events and severity.](#eTable4)**

| **Systemic organ categories (SOC)** | **50 μg dose (1) (N=150)[1]** | | | **100 μg dose (2) (N=149)** | | | **Placebo (3) (N=151)** | | | **Total (N=450)** | | | ***P*[2]*(1)VS(2)*** | ***P(1)VS(3)*** | ***P(2)VS(3)*** | |
| --- | --- | --- | --- | --- | --- | --- | --- | --- | --- | --- | --- | --- | --- | --- | --- | --- |
| **Preferred term (PT)** | **nAE[3]** | **n[4]** | **(%)[5]** | **nAE** | **n** | **(%)** | **nAE** | **n** | **(%)** | **nAE** | **n** | **(%)** |
| **TEAE** | 61 | 35 | 23.33 | 96 | 44 | 29.53 | 35 | 20 | 13.25 | 192 | 99 | 22.00 | 0.2399 | 0.0258 | | 0.0007 |
| Grade 1 | 46 | 31 | 20.67 | 76 | 40 | 26.85 | 33 | 20 | 13.25 | 155 | 91 | 20.22 | 0.2236 | 0.0930 | | 0.0038 |
| Grade 2 | 15 | 9 | 6.00 | 14 | 9 | 6.04 | 2 | 2 | 1.32 | 31 | 20 | 4.44 | 1.0000 | 0.0349 | | 0.0343 |
| Grade 3 | 0 | 0 | 0.00 | 6 | 3 | 2.01 | 0 | 0 | 0.00 | 6 | 3 | 0.67 | 0.1225 | 1.0000 | | 0.1213 |
| **Systemic and local AEs** | 42 | 26 | 17.33 | 74 | 37 | 24.83 | 21 | 16 | 10.60 | 137 | 79 | 17.56 | 0.1207 | 0.0988 | | 0.0014 |
| Grade 1 | 37 | 25 | 16.67 | 60 | 33 | 22.15 | 21 | 16 | 10.60 | 118 | 74 | 16.44 | 0.2451 | 0.1338 | | 0.0078 |
| Grade 2 | 5 | 3 | 2.00 | 12 | 7 | 4.70 | 0 | 0 | 0.00 | 17 | 10 | 2.22 | 0.2179 | 0.1225 | | 0.0069 |
| Grade 3 | 0 | 0 | 0.00 | 2 | 2 | 1.34 | 0 | 0 | 0.00 | 2 | 2 | 0.44 | 0.2475 | 1.0000 | | 0.2458 |
| Injection-site pain | 16 | 15 | 10.00 | 37 | 26 | 17.45 | 7 | 7 | 4.64 | 60 | 48 | 10.67 | 0.0663 | 0.0807 | | 0.0004 |
| Grade 1 | 16 | 15 | 10.00 | 36 | 25 | 16.78 | 7 | 7 | 4.64 | 59 | 47 | 10.44 | 0.0919 | 0.0807 | | 0.0007 |
| Grade 2 | 0 | 0 | 0.00 | 1 | 1 | 0.67 | 0 | 0 | 0.00 | 1 | 1 | 0.22 | 0.4983 | 1.0000 | | 0.4967 |
| Grade 3 | 0 | 0 | 0.00 | 0 | 0 | 0.00 | 0 | 0 | 0.00 | 0 | 0 | 0.00 | 1.0000 | 1.0000 | | 1.0000 |
| Fatigue | 10 | 8 | 5.33 | 10 | 10 | 6.71 | 8 | 7 | 4.64 | 28 | 25 | 5.56 | 0.6366 | 0.7982 | | 0.4654 |
| Grade 1 | 9 | 7 | 4.67 | 8 | 8 | 5.37 | 8 | 7 | 4.64 | 25 | 22 | 4.89 | 0.7982 | 1.0000 | | 0.7975 |
| Grade 2 | 1 | 1 | 0.67 | 1 | 1 | 0.67 | 0 | 0 | 0.00 | 2 | 2 | 0.44 | 1.0000 | 0.4983 | | 0.4967 |
| Grade 3 | 0 | 0 | 0.00 | 1 | 1 | 0.67 | 0 | 0 | 0.00 | 1 | 1 | 0.22 | 0.4983 | 1.0000 | | 0.4967 |
| Injection-site itch | 4 | 4 | 2.67 | 9 | 8 | 5.37 | 4 | 3 | 1.99 | 17 | 15 | 3.33 | 0.2562 | 0.7229 | | 0.1366 |
| Grade 1 | 4 | 4 | 2.67 | 7 | 7 | 4.70 | 4 | 3 | 1.99 | 15 | 14 | 3.11 | 0.3778 | 0.7229 | | 0.2164 |
| Grade 2 | 0 | 0 | 0.00 | 2 | 2 | 1.34 | 0 | 0 | 0.00 | 2 | 2 | 0.44 | 0.2475 | 1.0000 | | 0.2458 |
| Grade 3 | 0 | 0 | 0.00 | 0 | 0 | 0.00 | 0 | 0 | 0.00 | 0 | 0 | 0.00 | 1.0000 | 1.0000 | | 1.0000 |
| Injection-site redness | 2 | 1 | 0.67 | 9 | 8 | 5.37 | 0 | 0 | 0.00 | 11 | 9 | 2.00 | 0.0195 | 0.4983 | | 0.0034 |
| Grade 1 | 1 | 1 | 0.67 | 4 | 4 | 2.68 | 0 | 0 | 0.00 | 5 | 5 | 1.11 | 0.2140 | 0.4983 | | 0.0596 |
| Grade 2 | 1 | 1 | 0.67 | 4 | 3 | 2.01 | 0 | 0 | 0.00 | 5 | 4 | 0.89 | 0.3708 | 0.4983 | | 0.1213 |
| Grade 3 | 0 | 0 | 0.00 | 1 | 1 | 0.67 | 0 | 0 | 0.00 | 1 | 1 | 0.22 | 0.4983 | 1.0000 | | 0.4967 |
| Injection-site induration | 2 | 2 | 1.33 | 4 | 3 | 2.01 | 0 | 0 | 0.00 | 6 | 5 | 1.11 | 0.6843 | 0.2475 | | 0.1213 |
| Grade 1 | 1 | 1 | 0.67 | 3 | 2 | 1.34 | 0 | 0 | 0.00 | 4 | 3 | 0.67 | 0.6225 | 0.4983 | | 0.2458 |
| Grade 2 | 1 | 1 | 0.67 | 1 | 1 | 0.67 | 0 | 0 | 0.00 | 2 | 2 | 0.44 | 1.0000 | 0.4983 | | 0.4967 |
| Grade 3 | 0 | 0 | 0.00 | 0 | 0 | 0.00 | 0 | 0 | 0.00 | 0 | 0 | 0.00 | 1.0000 | 1.0000 | | 1.0000 |
| Chills | 4 | 4 | 2.67 | 0 | 0 | 0.00 | 0 | 0 | 0.00 | 4 | 4 | 0.89 | 0.1225 | 0.0604 | | 1.0000 |
| Grade 1 | 3 | 3 | 2.00 | 0 | 0 | 0.00 | 0 | 0 | 0.00 | 3 | 3 | 0.67 | 0.2475 | 0.1225 | | 1.0000 |
| Grade 2 | 1 | 1 | 0.67 | 0 | 0 | 0.00 | 0 | 0 | 0.00 | 1 | 1 | 0.22 | 1.0000 | 0.4983 | | 1.0000 |
| Grade 3 | 0 | 0 | 0.00 | 0 | 0 | 0.00 | 0 | 0 | 0.00 | 0 | 0 | 0.00 | 1.0000 | 1.0000 | | 1.0000 |
| Injection-site swelling | 1 | 1 | 0.67 | 2 | 2 | 1.34 | 1 | 1 | 0.66 | 4 | 4 | 0.89 | 0.6225 | 1.0000 | | 0.6212 |
| Grade 1 | 0 | 0 | 0.00 | 0 | 0 | 0.00 | 1 | 1 | 0.66 | 1 | 1 | 0.22 | 1.0000 | 1.0000 | | 1.0000 |
| Grade 2 | 1 | 1 | 0.67 | 2 | 2 | 1.34 | 0 | 0 | 0.00 | 3 | 3 | 0.67 | 0.6225 | 0.4983 | | 0.2458 |
| Grade 3 | 0 | 0 | 0.00 | 0 | 0 | 0.00 | 0 | 0 | 0.00 | 0 | 0 | 0.00 | 1.0000 | 1.0000 | | 1.0000 |
| Fever | 0 | 0 | 0.00 | 2 | 2 | 1.34 | 0 | 0 | 0.00 | 2 | 2 | 0.44 | 0.2475 | 1.0000 | | 0.2458 |
| Grade 1 | 0 | 0 | 0.00 | 1 | 1 | 0.67 | 0 | 0 | 0.00 | 1 | 1 | 0.22 | 0.4983 | 1.0000 | | 0.4967 |
| Grade 2 | 0 | 0 | 0.00 | 1 | 1 | 0.67 | 0 | 0 | 0.00 | 1 | 1 | 0.22 | 0.4983 | 1.0000 | | 0.4967 |
| Grade 3 | 0 | 0 | 0.00 | 0 | 0 | 0.00 | 0 | 0 | 0.00 | 0 | 0 | 0.00 | 1.0000 | 1.0000 | | 1.0000 |
| Injection-site discomfort | 1 | 1 | 0.67 | 1 | 1 | 0.67 | 0 | 0 | 0.00 | 2 | 2 | 0.44 | 1.0000 | 0.4983 | | 0.4967 |
| Grade 1 | 1 | 1 | 0.67 | 1 | 1 | 0.67 | 0 | 0 | 0.00 | 2 | 2 | 0.44 | 1.0000 | 0.4983 | | 0.4967 |
| Grade 2 | 0 | 0 | 0.00 | 0 | 0 | 0.00 | 0 | 0 | 0.00 | 0 | 0 | 0.00 | 1.0000 | 1.0000 | | 1.0000 |
| Grade 3 | 0 | 0 | 0.00 | 0 | 0 | 0.00 | 0 | 0 | 0.00 | 0 | 0 | 0.00 | 1.0000 | 1.0000 | | 1.0000 |
| Injection-site discolouration | 1 | 1 | 0.67 | 0 | 0 | 0.00 | 1 | 1 | 0.66 | 2 | 2 | 0.44 | 1.0000 | 1.0000 | | 1.0000 |
| Grade 1 | 1 | 1 | 0.67 | 0 | 0 | 0.00 | 1 | 1 | 0.66 | 2 | 2 | 0.44 | 1.0000 | 1.0000 | | 1.0000 |
| Grade 2 | 0 | 0 | 0.00 | 0 | 0 | 0.00 | 0 | 0 | 0.00 | 0 | 0 | 0.00 | 1.0000 | 1.0000 | | 1.0000 |
| Grade 3 | 0 | 0 | 0.00 | 0 | 0 | 0.00 | 0 | 0 | 0.00 | 0 | 0 | 0.00 | 1.0000 | 1.0000 | | 1.0000 |
| Chest discomfort | 1 | 1 | 0.67 | 0 | 0 | 0.00 | 0 | 0 | 0.00 | 1 | 1 | 0.22 | 1.0000 | 0.4983 | | 1.0000 |
| Grade 1 | 1 | 1 | 0.67 | 0 | 0 | 0.00 | 0 | 0 | 0.00 | 1 | 1 | 0.22 | 1.0000 | 0.4983 | | 1.0000 |
| Grade 2 | 0 | 0 | 0.00 | 0 | 0 | 0.00 | 0 | 0 | 0.00 | 0 | 0 | 0.00 | 1.0000 | 1.0000 | | 1.0000 |
| Grade 3 | 0 | 0 | 0.00 | 0 | 0 | 0.00 | 0 | 0 | 0.00 | 0 | 0 | 0.00 | 1.0000 | 1.0000 | | 1.0000 |
| **Nervous system disorders** | 2 | 2 | 1.33 | 8 | 8 | 5.37 | 7 | 6 | 3.97 | 17 | 16 | 3.56 | 0.0606 | 0.2825 | | 0.5966 |
| Grade 1 | 0 | 0 | 0.00 | 5 | 5 | 3.36 | 6 | 5 | 3.31 | 11 | 10 | 2.22 | 0.0297 | 0.0604 | | 1.0000 |
| Grade 2 | 2 | 2 | 1.33 | 1 | 1 | 0.67 | 1 | 1 | 0.66 | 4 | 4 | 0.89 | 1.0000 | 0.6225 | | 1.0000 |
| Grade 3 | 0 | 0 | 0.00 | 2 | 2 | 1.34 | 0 | 0 | 0.00 | 2 | 2 | 0.44 | 0.2475 | 1.0000 | | 0.2458 |
| Headache | 2 | 2 | 1.33 | 4 | 4 | 2.68 | 5 | 4 | 2.65 | 11 | 10 | 2.22 | 0.4476 | 0.6844 | | 1.0000 |
| Grade 1 | 0 | 0 | 0.00 | 1 | 1 | 0.67 | 4 | 3 | 1.99 | 5 | 4 | 0.89 | 0.4983 | 0.2475 | | 0.6225 |
| Grade 2 | 2 | 2 | 1.33 | 1 | 1 | 0.67 | 1 | 1 | 0.66 | 4 | 4 | 0.89 | 1.0000 | 0.6225 | | 1.0000 |
| Grade 3 | 0 | 0 | 0.00 | 2 | 2 | 1.34 | 0 | 0 | 0.00 | 2 | 2 | 0.44 | 0.2475 | 1.0000 | | 0.2458 |
| Dizziness | 0 | 0 | 0.00 | 4 | 4 | 2.68 | 1 | 1 | 0.66 | 5 | 5 | 1.11 | 0.0604 | 1.0000 | | 0.2125 |
| Grade 1 | 0 | 0 | 0.00 | 4 | 4 | 2.68 | 1 | 1 | 0.66 | 5 | 5 | 1.11 | 0.0604 | 1.0000 | | 0.2125 |
| Grade 2 | 0 | 0 | 0.00 | 0 | 0 | 0.00 | 0 | 0 | 0.00 | 0 | 0 | 0.00 | 1.0000 | 1.0000 | | 1.0000 |
| Grade 3 | 0 | 0 | 0.00 | 0 | 0 | 0.00 | 0 | 0 | 0.00 | 0 | 0 | 0.00 | 1.0000 | 1.0000 | | 1.0000 |
| Dysgeusia | 0 | 0 | 0.00 | 0 | 0 | 0.00 | 1 | 1 | 0.66 | 1 | 1 | 0.22 | 1.0000 | 1.0000 | | 1.0000 |
| Grade 1 | 0 | 0 | 0.00 | 0 | 0 | 0.00 | 1 | 1 | 0.66 | 1 | 1 | 0.22 | 1.0000 | 1.0000 | | 1.0000 |
| Grade 2 | 0 | 0 | 0.00 | 0 | 0 | 0.00 | 0 | 0 | 0.00 | 0 | 0 | 0.00 | 1.0000 | 1.0000 | | 1.0000 |
| Grade 3 | 0 | 0 | 0.00 | 0 | 0 | 0.00 | 0 | 0 | 0.00 | 0 | 0 | 0.00 | 1.0000 | 1.0000 | | 1.0000 |
| **Gastrointestinal disorders** | 6 | 5 | 3.33 | 5 | 5 | 3.36 | 2 | 2 | 1.32 | 13 | 12 | 2.67 | 1.0000 | 0.2825 | | 0.2808 |
| Grade 1 | 3 | 3 | 2.00 | 3 | 3 | 2.01 | 2 | 2 | 1.32 | 8 | 8 | 1.78 | 1.0000 | 0.6844 | | 0.6833 |
| Grade 2 | 3 | 3 | 2.00 | 1 | 1 | 0.67 | 0 | 0 | 0.00 | 4 | 4 | 0.89 | 0.6225 | 0.1225 | | 0.4967 |
| Grade 3 | 0 | 0 | 0.00 | 1 | 1 | 0.67 | 0 | 0 | 0.00 | 1 | 1 | 0.22 | 0.4983 | 1.0000 | | 0.4967 |
| Diarrhea | 2 | 1 | 0.67 | 3 | 3 | 2.01 | 1 | 1 | 0.66 | 6 | 5 | 1.11 | 0.3708 | 1.0000 | | 0.3692 |
| Grade 1 | 1 | 1 | 0.67 | 2 | 2 | 1.34 | 1 | 1 | 0.66 | 4 | 4 | 0.89 | 0.6225 | 1.0000 | | 0.6212 |
| Grade 2 | 1 | 1 | 0.67 | 1 | 1 | 0.67 | 0 | 0 | 0.00 | 2 | 2 | 0.44 | 1.0000 | 0.4983 | | 0.4967 |
| Grade 3 | 0 | 0 | 0.00 | 0 | 0 | 0.00 | 0 | 0 | 0.00 | 0 | 0 | 0.00 | 1.0000 | 1.0000 | | 1.0000 |
| Nausea | 2 | 2 | 1.33 | 1 | 1 | 0.67 | 0 | 0 | 0.00 | 3 | 3 | 0.67 | 1.0000 | 0.2475 | | 0.4967 |
| Grade 1 | 1 | 1 | 0.67 | 0 | 0 | 0.00 | 0 | 0 | 0.00 | 1 | 1 | 0.22 | 1.0000 | 0.4983 | | 1.0000 |
| Grade 2 | 1 | 1 | 0.67 | 0 | 0 | 0.00 | 0 | 0 | 0.00 | 1 | 1 | 0.22 | 1.0000 | 0.4983 | | 1.0000 |
| Grade 3 | 0 | 0 | 0.00 | 1 | 1 | 0.67 | 0 | 0 | 0.00 | 1 | 1 | 0.22 | 0.4983 | 1.0000 | | 0.4967 |
| Abdominal pain | 1 | 1 | 0.67 | 1 | 1 | 0.67 | 1 | 1 | 0.66 | 3 | 3 | 0.67 | 1.0000 | 1.0000 | | 1.0000 |
| Grade 1 | 1 | 1 | 0.67 | 1 | 1 | 0.67 | 1 | 1 | 0.66 | 3 | 3 | 0.67 | 1.0000 | 1.0000 | | 1.0000 |
| Grade 2 | 0 | 0 | 0.00 | 0 | 0 | 0.00 | 0 | 0 | 0.00 | 0 | 0 | 0.00 | 1.0000 | 1.0000 | | 1.0000 |
| Grade 3 | 0 | 0 | 0.00 | 0 | 0 | 0.00 | 0 | 0 | 0.00 | 0 | 0 | 0.00 | 1.0000 | 1.0000 | | 1.0000 |
| Gingival pain | 1 | 1 | 0.67 | 0 | 0 | 0.00 | 0 | 0 | 0.00 | 1 | 1 | 0.22 | 1.0000 | 1.0000 | | 1.0000 |
| Grade 1 | 0 | 0 | 0.00 | 0 | 0 | 0.00 | 0 | 0 | 0.00 | 0 | 0 | 0.00 | 1.0000 | 1.0000 | | 1.0000 |
| Grade 2 | 1 | 1 | 0.67 | 0 | 0 | 0.00 | 0 | 0 | 0.00 | 1 | 1 | 0.22 | 1.0000 | 1.0000 | | 1.0000 |
| Grade 3 | 0 | 0 | 0.00 | 0 | 0 | 0.00 | 0 | 0 | 0.00 | 0 | 0 | 0.00 | 1.0000 | 1.0000 | | 1.0000 |
| **Musculoskeletal and connective tissue disorders** | 4 | 4 | 2.67 | 3 | 3 | 2.01 | 5 | 3 | 1.99 | 12 | 10 | 2.22 | 1.0000 | 0.7229 | | 1.0000 |
| Grade 1 | 3 | 3 | 2.00 | 2 | 2 | 1.34 | 4 | 2 | 1.32 | 9 | 7 | 1.56 | 1.0000 | 0.6844 | | 1.0000 |
| Grade 2 | 1 | 1 | 0.67 | 0 | 0 | 0.00 | 1 | 1 | 0.66 | 2 | 2 | 0.44 | 1.0000 | 1.0000 | | 1.0000 |
| Grade 3 | 0 | 0 | 0.00 | 1 | 1 | 0.67 | 0 | 0 | 0.00 | 1 | 1 | 0.22 | 0.4983 | 1.0000 | | 0.4967 |
| Myalgia | 3 | 3 | 2.00 | 3 | 3 | 2.01 | 3 | 2 | 1.32 | 9 | 8 | 1.78 | 1.0000 | 0.6844 | | 0.6833 |
| Grade 1 | 2 | 2 | 1.33 | 2 | 2 | 1.34 | 2 | 1 | 0.66 | 6 | 5 | 1.11 | 1.0000 | 0.6225 | | 0.6212 |
| Grade 2 | 1 | 1 | 0.67 | 0 | 0 | 0.00 | 1 | 1 | 0.66 | 2 | 2 | 0.44 | 1.0000 | 1.0000 | | 1.0000 |
| Grade 3 | 0 | 0 | 0.00 | 1 | 1 | 0.67 | 0 | 0 | 0.00 | 1 | 1 | 0.22 | 0.4983 | 1.0000 | | 0.4967 |
| Arthralgia | 0 | 0 | 0.00 | 0 | 0 | 0.00 | 1 | 1 | 0.66 | 1 | 1 | 0.22 | 1.0000 | 1.0000 | | 1.0000 |
| Grade 1 | 0 | 0 | 0.00 | 0 | 0 | 0.00 | 1 | 1 | 0.66 | 1 | 1 | 0.22 | 1.0000 | 1.0000 | | 1.0000 |
| Grade 2 | 0 | 0 | 0.00 | 0 | 0 | 0.00 | 0 | 0 | 0.00 | 0 | 0 | 0.00 | 1.0000 | 1.0000 | | 1.0000 |
| Grade 3 | 0 | 0 | 0.00 | 0 | 0 | 0.00 | 0 | 0 | 0.00 | 0 | 0 | 0.00 | 1.0000 | 1.0000 | | 1.0000 |
| Muscular weakness | 1 | 1 | 0.67 | 0 | 0 | 0.00 | 0 | 0 | 0.00 | 1 | 1 | 0.22 | 1.0000 | 0.4983 | | 1.0000 |
| Grade 1 | 1 | 1 | 0.67 | 0 | 0 | 0.00 | 0 | 0 | 0.00 | 1 | 1 | 0.22 | 1.0000 | 0.4983 | | 1.0000 |
| Grade 2 | 0 | 0 | 0.00 | 0 | 0 | 0.00 | 0 | 0 | 0.00 | 0 | 0 | 0.00 | 1.0000 | 1.0000 | | 1.0000 |
| Grade 3 | 0 | 0 | 0.00 | 0 | 0 | 0.00 | 0 | 0 | 0.00 | 0 | 0 | 0.00 | 1.0000 | 1.0000 | | 1.0000 |
| Neck pain | 0 | 0 | 0.00 | 0 | 0 | 0.00 | 1 | 1 | 0.66 | 1 | 1 | 0.22 | 1.0000 | 1.0000 | | 1.0000 |
| Grade 1 | 0 | 0 | 0.00 | 0 | 0 | 0.00 | 1 | 1 | 0.66 | 1 | 1 | 0.22 | 1.0000 | 1.0000 | | 1.0000 |
| Grade 2 | 0 | 0 | 0.00 | 0 | 0 | 0.00 | 0 | 0 | 0.00 | 0 | 0 | 0.00 | 1.0000 | 1.0000 | | 1.0000 |
| Grade 3 | 0 | 0 | 0.00 | 0 | 0 | 0.00 | 0 | 0 | 0.00 | 0 | 0 | 0.00 | 1.0000 | 1.0000 | | 1.0000 |
| **Respiratory, thoracic and mediastinal disorders** | 1 | 1 | 0.67 | 2 | 2 | 1.34 | 0 | 0 | 0.00 | 3 | 3 | 0.67 | 0.6225 | 0.4983 | | 0.2458 |
| Grade 1 | 0 | 0 | 0.00 | 2 | 2 | 1.34 | 0 | 0 | 0.00 | 2 | 2 | 0.44 | 0.2475 | 1.0000 | | 0.2458 |
| Grade 2 | 1 | 1 | 0.67 | 0 | 0 | 0.00 | 0 | 0 | 0.00 | 1 | 1 | 0.22 | 1.0000 | 0.4983 | | 1.0000 |
| Grade 3 | 0 | 0 | 0.00 | 0 | 0 | 0.00 | 0 | 0 | 0.00 | 0 | 0 | 0.00 | 1.0000 | 1.0000 | | 1.0000 |
| Productive cough | 0 | 0 | 0.00 | 1 | 1 | 0.67 | 0 | 0 | 0.00 | 1 | 1 | 0.22 | 0.4983 | 1.0000 | | 0.4967 |
| Grade 1 | 0 | 0 | 0.00 | 1 | 1 | 0.67 | 0 | 0 | 0.00 | 1 | 1 | 0.22 | 0.4983 | 1.0000 | | 0.4967 |
| Grade 2 | 0 | 0 | 0.00 | 0 | 0 | 0.00 | 0 | 0 | 0.00 | 0 | 0 | 0.00 | 1.0000 | 1.0000 | | 1.0000 |
| Grade 3 | 0 | 0 | 0.00 | 0 | 0 | 0.00 | 0 | 0 | 0.00 | 0 | 0 | 0.00 | 1.0000 | 1.0000 | | 1.0000 |
| Rhinorrhoea | 1 | 1 | 0.67 | 0 | 0 | 0.00 | 0 | 0 | 0.00 | 1 | 1 | 0.22 | 1.0000 | 0.4983 | | 1.0000 |
| Grade 1 | 0 | 0 | 0.00 | 0 | 0 | 0.00 | 0 | 0 | 0.00 | 0 | 0 | 0.00 | 1.0000 | 1.0000 | | 1.0000 |
| Grade 2 | 1 | 1 | 0.67 | 0 | 0 | 0.00 | 0 | 0 | 0.00 | 1 | 1 | 0.22 | 1.0000 | 0.4983 | | 1.0000 |
| Grade 3 | 0 | 0 | 0.00 | 0 | 0 | 0.00 | 0 | 0 | 0.00 | 0 | 0 | 0.00 | 1.0000 | 1.0000 | | 1.0000 |
| Nasal congestion | 0 | 0 | 0.00 | 1 | 1 | 0.67 | 0 | 0 | 0.00 | 1 | 1 | 0.22 | 0.4983 | 1.0000 | | 0.4967 |
| Grade 1 | 0 | 0 | 0.00 | 1 | 1 | 0.67 | 0 | 0 | 0.00 | 1 | 1 | 0.22 | 0.4983 | 1.0000 | | 0.4967 |
| Grade 2 | 0 | 0 | 0.00 | 0 | 0 | 0.00 | 0 | 0 | 0.00 | 0 | 0 | 0.00 | 1.0000 | 1.0000 | | 1.0000 |
| Grade 3 | 0 | 0 | 0.00 | 0 | 0 | 0.00 | 0 | 0 | 0.00 | 0 | 0 | 0.00 | 1.0000 | 1.0000 | | 1.0000 |
| **Skin and subcutaneous tissue disorders** | 2 | 2 | 1.33 | 2 | 1 | 0.67 | 0 | 0 | 0.00 | 4 | 3 | 0.67 | 1.0000 | 0.2475 | | 0.4967 |
| Grade 1 | 2 | 2 | 1.33 | 2 | 1 | 0.67 | 0 | 0 | 0.00 | 4 | 3 | 0.67 | 1.0000 | 0.2475 | | 0.4967 |
| Grade 2 | 0 | 0 | 0.00 | 0 | 0 | 0.00 | 0 | 0 | 0.00 | 0 | 0 | 0.00 | 1.0000 | 1.0000 | | 1.0000 |
| Grade 3 | 0 | 0 | 0.00 | 0 | 0 | 0.00 | 0 | 0 | 0.00 | 0 | 0 | 0.00 | 1.0000 | 1.0000 | | 1.0000 |
| Itch | 1 | 1 | 0.67 | 0 | 0 | 0.00 | 0 | 0 | 0.00 | 1 | 1 | 0.22 | 1.0000 | 0.4983 | | 1.0000 |
| Grade 1 | 1 | 1 | 0.67 | 0 | 0 | 0.00 | 0 | 0 | 0.00 | 1 | 1 | 0.22 | 1.0000 | 0.4983 | | 1.0000 |
| Grade 2 | 0 | 0 | 0.00 | 0 | 0 | 0.00 | 0 | 0 | 0.00 | 0 | 0 | 0.00 | 1.0000 | 1.0000 | | 1.0000 |
| Grade 3 | 0 | 0 | 0.00 | 0 | 0 | 0.00 | 0 | 0 | 0.00 | 0 | 0 | 0.00 | 1.0000 | 1.0000 | | 1.0000 |
| Pruritic rash | 1 | 1 | 0.67 | 0 | 0 | 0.00 | 0 | 0 | 0.00 | 1 | 1 | 0.22 | 1.0000 | 0.4983 | | 1.0000 |
| Grade 1 | 1 | 1 | 0.67 | 0 | 0 | 0.00 | 0 | 0 | 0.00 | 1 | 1 | 0.22 | 1.0000 | 0.4983 | | 1.0000 |
| Grade 2 | 0 | 0 | 0.00 | 0 | 0 | 0.00 | 0 | 0 | 0.00 | 0 | 0 | 0.00 | 1.0000 | 1.0000 | | 1.0000 |
| Grade 3 | 0 | 0 | 0.00 | 0 | 0 | 0.00 | 0 | 0 | 0.00 | 0 | 0 | 0.00 | 1.0000 | 1.0000 | | 1.0000 |
| Skin burning sensation | 0 | 0 | 0.00 | 2 | 1 | 0.67 | 0 | 0 | 0.00 | 2 | 1 | 0.22 | 0.4983 | 1.0000 | | 0.4967 |
| Grade 1 | 0 | 0 | 0.00 | 2 | 1 | 0.67 | 0 | 0 | 0.00 | 2 | 1 | 0.22 | 0.4983 | 1.0000 | | 0.4967 |
| Grade 2 | 0 | 0 | 0.00 | 0 | 0 | 0.00 | 0 | 0 | 0.00 | 0 | 0 | 0.00 | 1.0000 | 1.0000 | | 1.0000 |
| Grade 3 | 0 | 0 | 0.00 | 0 | 0 | 0.00 | 0 | 0 | 0.00 | 0 | 0 | 0.00 | 1.0000 | 1.0000 | | 1.0000 |
| **Immune system disorders** | 1 | 1 | 0.67 | 1 | 1 | 0.67 | 0 | 0 | 0.00 | 2 | 2 | 0.44 | 1.0000 | 0.4983 | | 0.4967 |
| Grade 1 | 0 | 0 | 0.00 | 1 | 1 | 0.67 | 0 | 0 | 0.00 | 1 | 1 | 0.22 | 0.4983 | 1.0000 | | 0.4967 |
| Grade 2 | 1 | 1 | 0.67 | 0 | 0 | 0.00 | 0 | 0 | 0.00 | 1 | 1 | 0.22 | 1.0000 | 0.4983 | | 1.0000 |
| Grade 3 | 0 | 0 | 0.00 | 0 | 0 | 0.00 | 0 | 0 | 0.00 | 0 | 0 | 0.00 | 1.0000 | 1.0000 | | 1.0000 |
| Hypersensitivity | 1 | 1 | 0.67 | 1 | 1 | 0.67 | 0 | 0 | 0.00 | 2 | 2 | 0.44 | 1.0000 | 0.4983 | | 0.4967 |
| Grade 1 | 0 | 0 | 0.00 | 1 | 1 | 0.67 | 0 | 0 | 0.00 | 1 | 1 | 0.22 | 0.4983 | 1.0000 | | 0.4967 |
| Grade 2 | 1 | 1 | 0.67 | 0 | 0 | 0.00 | 0 | 0 | 0.00 | 1 | 1 | 0.22 | 1.0000 | 0.4983 | | 1.0000 |
| Grade 3 | 0 | 0 | 0.00 | 0 | 0 | 0.00 | 0 | 0 | 0.00 | 0 | 0 | 0.00 | 1.0000 | 1.0000 | | 1.0000 |
| **Infections and infestations** | 0 | 0 | 0.00 | 1 | 1 | 0.67 | 0 | 0 | 0.00 | 1 | 1 | 0.22 | 0.4983 | 1.0000 | | 0.4967 |
| Grade 1 | 0 | 0 | 0.00 | 1 | 1 | 0.67 | 0 | 0 | 0.00 | 1 | 1 | 0.22 | 0.4983 | 1.0000 | | 0.4967 |
| Grade 2 | 0 | 0 | 0.00 | 0 | 0 | 0.00 | 0 | 0 | 0.00 | 0 | 0 | 0.00 | 1.0000 | 1.0000 | | 1.0000 |
| Grade 3 | 0 | 0 | 0.00 | 0 | 0 | 0.00 | 0 | 0 | 0.00 | 0 | 0 | 0.00 | 1.0000 | 1.0000 | | 1.0000 |
| Upper respiratory tract infection | 0 | 0 | 0.00 | 1 | 1 | 0.67 | 0 | 0 | 0.00 | 1 | 1 | 0.22 | 0.4983 | 1.0000 | | 0.4967 |
| Grade 1 | 0 | 0 | 0.00 | 1 | 1 | 0.67 | 0 | 0 | 0.00 | 1 | 1 | 0.22 | 0.4983 | 1.0000 | | 0.4967 |
| Grade 2 | 0 | 0 | 0.00 | 0 | 0 | 0.00 | 0 | 0 | 0.00 | 0 | 0 | 0.00 | 1.0000 | 1.0000 | | 1.0000 |
| Grade 3 | 0 | 0 | 0.00 | 0 | 0 | 0.00 | 0 | 0 | 0.00 | 0 | 0 | 0.00 | 1.0000 | 1.0000 | | 1.0000 |
| **Eye disorders** | 2 | 1 | 0.67 | 0 | 0 | 0.00 | 0 | 0 | 0.00 | 2 | 1 | 0.22 | 1.0000 | 0.4983 | | 1.0000 |
| Grade 1 | 0 | 0 | 0.00 | 0 | 0 | 0.00 | 0 | 0 | 0.00 | 0 | 0 | 0.00 | 1.0000 | 1.0000 | | 1.0000 |
| Grade 2 | 2 | 1 | 0.67 | 0 | 0 | 0.00 | 0 | 0 | 0.00 | 2 | 1 | 0.22 | 1.0000 | 0.4983 | | 1.0000 |
| Grade 3 | 0 | 0 | 0.00 | 0 | 0 | 0.00 | 0 | 0 | 0.00 | 0 | 0 | 0.00 | 1.0000 | 1.0000 | | 1.0000 |
| Eye pruritus | 1 | 1 | 0.67 | 0 | 0 | 0.00 | 0 | 0 | 0.00 | 1 | 1 | 0.22 | 1.0000 | 0.4983 | | 1.0000 |
| Grade 1 | 0 | 0 | 0.00 | 0 | 0 | 0.00 | 0 | 0 | 0.00 | 0 | 0 | 0.00 | 1.0000 | 1.0000 | | 1.0000 |
| Grade 2 | 1 | 1 | 0.67 | 0 | 0 | 0.00 | 0 | 0 | 0.00 | 1 | 1 | 0.22 | 1.0000 | 0.4983 | | 1.0000 |
| Grade 3 | 0 | 0 | 0.00 | 0 | 0 | 0.00 | 0 | 0 | 0.00 | 0 | 0 | 0.00 | 1.0000 | 1.0000 | | 1.0000 |
| Eye swelling | 1 | 1 | 0.67 | 0 | 0 | 0.00 | 0 | 0 | 0.00 | 1 | 1 | 0.22 | 1.0000 | 0.4983 | | 1.0000 |
| Grade 1 | 0 | 0 | 0.00 | 0 | 0 | 0.00 | 0 | 0 | 0.00 | 0 | 0 | 0.00 | 1.0000 | 1.0000 | | 1.0000 |
| Grade 2 | 1 | 1 | 0.67 | 0 | 0 | 0.00 | 0 | 0 | 0.00 | 1 | 1 | 0.22 | 1.0000 | 0.4983 | | 1.0000 |
| Grade 3 | 0 | 0 | 0.00 | 0 | 0 | 0.00 | 0 | 0 | 0.00 | 0 | 0 | 0.00 | 1.0000 | 1.0000 | | 1.0000 |
| **Psychiatric disorders** | 1 | 1 | 0.67 | 0 | 0 | 0.00 | 0 | 0 | 0.00 | 1 | 1 | 0.22 | 1.0000 | 0.4983 | | 1.0000 |
| Grade 1 | 1 | 1 | 0.67 | 0 | 0 | 0.00 | 0 | 0 | 0.00 | 1 | 1 | 0.22 | 1.0000 | 0.4983 | | 1.0000 |
| Grade 2 | 0 | 0 | 0.00 | 0 | 0 | 0.00 | 0 | 0 | 0.00 | 0 | 0 | 0.00 | 1.0000 | 1.0000 | | 1.0000 |
| Grade 3 | 0 | 0 | 0.00 | 0 | 0 | 0.00 | 0 | 0 | 0.00 | 0 | 0 | 0.00 | 1.0000 | 1.0000 | | 1.0000 |
| Agitation | 1 | 1 | 0.67 | 0 | 0 | 0.00 | 0 | 0 | 0.00 | 1 | 1 | 0.22 | 1.0000 | 0.4983 | | 1.0000 |
| Grade 1 | 1 | 1 | 0.67 | 0 | 0 | 0.00 | 0 | 0 | 0.00 | 1 | 1 | 0.22 | 1.0000 | 0.4983 | | 1.0000 |
| Grade 2 | 0 | 0 | 0.00 | 0 | 0 | 0.00 | 0 | 0 | 0.00 | 0 | 0 | 0.00 | 1.0000 | 1.0000 | | 1.0000 |
| Grade 3 | 0 | 0 | 0.00 | 0 | 0 | 0.00 | 0 | 0 | 0.00 | 0 | 0 | 0.00 | 1.0000 | 1.0000 | | 1.0000 |

[1] N = number of participants in each group. [2] *P*-values were calculated using Fisher's exact test. [3] nAE = number of adverse events. [4] n = number of participants who reported adverse events. [5] % = the percentage of participants who reported adverse events in each group.

Adverse events were coded according to MedDRA version 25.1.

# [Table S5. Serious Adverse Events](#eTable5)

| **SAE-description** | **SOC** | **PT** | **Start days** | **First dose vaccination date** | **Duration (Days)** | **Severity** | **Outcome** | **Causality** | **Drop-out** |
| --- | --- | --- | --- | --- | --- | --- | --- | --- | --- |
| **Group: 50 μg dose; Participant: A004; Age (years): 60.39; Sex: female** | | | | | | | | | |
| Chronic inflammatory demyelinating polyneuropathy | Nervous system disorders | Chronic inflammatory demyelinating polyradiculoneuropathy | 2022-05-23 | 2022-04-22 | 7 | Grade 2 | Improved | Possibly unrelated | No |
| **Group: 50 μg dose; Participant: A167; Age (years): 53.25; Sex: male** | | | | | | | | | |
| Chronic nephritic syndrome | Renal and urinary disorders | Nephritic syndrome | 2022-09-20 | 2022-04-25 | 6 | Grade 3 | Improved | Possibly unrelated | No |
| **Group: 50 μg dose; Participant: A306; Age (years): 66.06; Sex: female** | | | | | | | | | |
| Cholecystitis with gallbladder calculi | Hepatobiliary disorders | Cholecystitis | 2022-07-15 | 2022-04-27 | 8 | Grade 3 | Symptoms disappear without sequelae | Possibly unrelated | No |
| Cholecystitis with gallbladder calculi | Hepatobiliary disorders | Cholelithiasis | 2022-07-15 | 2022-04-27 | 8 | Grade 3 | Symptoms disappear without sequelae | Possibly unrelated | No |
| **Group: 50 μg dose; Participant: A362; Age (years): 51.47; Sex: female** | | | | | | | | | |
| Lumbar disc herniatio(L4/5,L5/S1) | Musculoskeletal and connective tissue disorders | Intervertebral disc protrusion | 2022-11-06 | 2022-04-29 | 13 | Grade 3 | Improved | Possibly unrelated | No |
| **Group: 100 μg dose; Participant: A039; Age (years): 54.90; Sex: female** | | | | | | | | | |
| Cervical spondylosis with radiculopathy | Musculoskeletal and connective tissue disorders | Spinal osteoarthritis | 2022-05-11 | 2022-04-22 | 10 | Grade 3 | Improved | Possibly unrelated | No |
| Migraine | Nervous system disorders | Migraine | 2022-05-23 | 2022-04-22 | 4 | Grade 3 | Symptoms disappear without sequelae | Possibly unrelated | No |
| **Group: 100 μg dose; Participant: A076; Age (years): 52.62; Sex: male** | | | | | | | | | |
| Type 2 diabetes mellitus | Metabolism and nutrition disorders | Type 2 diabetes mellitus | 2022-05-19 | 2022-04-22 | 11 | Grade 3 | Improved | Unrelated | No |
| **Group: 100 μg dose; Participant: A104; Age (years): 55.89; Sex: female** | | | | | | | | | |
| Poorly differentiated adenocarcinoma of the lesser curvature of the gastric body | Neoplasms benign, malignant and unspecified (incl cysts and polyps) | Adenocarcinoma gastric | 2022-09-12 | 2022-04-24 | 14 | Grade 3 | Improved | Possibly unrelated | No |
| **Group: 100 μg dose; Participant: A159; Age (years): 51.78; Sex: female** | | | | | | | | | |
| Cervical radiculopathy with cervical disc herniation | Musculoskeletal and connective tissue disorders | Intervertebral disc protrusion | 2022-06-02 | 2022-04-25 | 8 | Grade 3 | Improved | Possibly unrelated | No |
| Cervical radiculopathy with cervical disc herniation | Injury, poisoning and procedural complications | Cervical radiculopathy | 2022-06-02 | 2022-04-25 | 8 | Grade 3 | Improved | Possibly unrelated | No |
| **Group: 100 μg dose; Participant: A263; Age (years): 59.35; Sex: female** | | | | | | | | | |
| Community-acquired pneumonia | Infections and infestations | Pneumonia | 2022-07-28 | 2022-04-27 | 7 | Grade 3 | Symptoms disappear without sequelae | Possibly unrelated | No |
| **Group: 100 μg dose; Participant: A348; Age (years): 53.17; Sex: male** | | | | | | | | | |
| Bleeding internal haemorrhoids (endoscopic polidocanol injection) | Gastrointestinal disorders | Haemorrhoids thrombosed | 2022-10-13 | 2022-04-29 | 11 | Grade 3 | Symptoms disappear without sequelae | Possibly unrelated | No |
| **Group: 100 μg dose; Participant: A351; Age (years): 65.04; Sex: female** | | | | | | | | | |
| Coronary artery atherosclerotic heart disease with unstable angina, NYHA class I | Cardiac disorders | Angina unstable | 2022-09-12 | 2022-04-29 | 4 | Grade 3 | Improved | Unrelated | No |
| Coronary artery atherosclerotic heart disease with unstable angina, NYHA class I | Cardiac disorders | Cardiac failure | 2022-09-12 | 2022-04-29 | 4 | Grade 3 | Improved | Unrelated | No |
| **Group: 100 μg dose; Participant: A355; Age (years): 50.95; Sex: female** | | | | | | | | | |
| Adenocarcinoma of the right lower lobe of the lung, TNM stage pT1N0M0, minimally invasive adenocarcinoma (non-mucinous type) | Neoplasms benign, malignant and unspecified (incl cysts and polyps) | Lung adenocarcinoma stage I | 2022-09-14 | 2022-04-29 | 9 | Grade 3 | Improved | Unrelated | No |
| **Group: 100 μg dose; Participant: A382; Age (years): 54.37; Sex: female** | | | | | | | | | |
| Hypothyroidism | Endocrine disorders | Hypothyroidism | 2022-11-10 | 2022-04-29 | 5 | Grade 3 | Improved | Possibly unrelated | No |
| **Group: 100 μg dose; Participant: A402; Age (years): 57.16; Sex: female** | | | | | | | | | |
| Multiple traumatic fractures of the body (fracture of the distal right clavicle, fractures of the left 4th–6th anterior ribs, scalp laceration, closed head injury, and multiple contusions of the extremities) | Injury, poisoning and procedural complications | Multiple fractures | 2022-07-18 | 2022-05-05 | 23 | Grade 3 | Improved | Unrelated | No |
| Multiple traumatic fractures of the body (fracture of the distal right clavicle, fractures of the left 4th–6th anterior ribs, scalp laceration, closed head injury, and multiple contusions of the extremities) | Injury, poisoning and procedural complications | Injury | 2022-07-18 | 2022-05-05 | 23 | Grade 3 | Improved | Unrelated | No |
| **Group: 100 μg dose; Participant: A411; Age (years): 57.65; Sex: female** | | | | | | | | | |
| Thoracic intervertebral disc herniation | Musculoskeletal and connective tissue disorders | Intervertebral disc protrusion | 2022-10-09 | 2022-05-05 | 5 | Grade 3 | Improved | Possibly unrelated | No |
| **Group: 100 μg dose; Participant: A423; Age (years): 66.17; Sex: female** | | | | | | | | | |
| Henoch-Schoenlein purpura (mixed type) | Skin and subcutaneous tissue disorders | Henoch-Schoenlein purpura | 2022-05-27 | 2022-05-05 | 13 | Grade 3 | Improved | Possibly unrelated | Yes |
| **Group: 100 μg dose; Participant: A447; Age (years): 62.13; Sex: male** | | | | | | | | | |
| Mass at the tongue base and vocal cords | Respiratory, thoracic and mediastinal disorders | Laryngeal neoplasm | 2022-06-30 | 2022-05-05 | 13 | Grade 3 | Improved | Possibly unrelated | No |
| Chronic rhinosinusitis with nasal polyps | Respiratory, thoracic and mediastinal disorders | Chronic rhinosinusitis with nasal polyps | 2022-06-30 | 2022-05-05 | 13 | Grade 3 | Improved | Possibly unrelated | No |
| Mass at the tongue base and vocal cords | Gastrointestinal disorders | Tongue disorder | 2022-06-30 | 2022-05-05 | 13 | Grade 3 | Improved | Possibly unrelated | No |
| Benign neoplasm of thyroid gland | Neoplasms benign, malignant and unspecified (incl cysts and polyps) | Benign neoplasm of thyroid gland | 2022-06-30 | 2022-05-05 | 13 | Grade 3 | Improved | Possibly unrelated | No |
| **Group: Placebo; Participant: A052; Age (years): 60.84; Sex: male** | | | | | | | | | |
| Left calcaneal fracture | Injury, poisoning and procedural complications | Foot fracture | 2022-09-15 | 2022-04-22 | 14 | Grade 3 | Improved | Unrelated | No |
| **Group: Placebo; Participant: A056; Age (years): 51.04; Sex: female** | | | | | | | | | |
| Cervical spondylosis, mixed type | Musculoskeletal and connective tissue disorders | Spinal osteoarthritis | 2022-08-09 | 2022-04-22 | 12 | Grade 3 | Improved | Unrelated | No |
| **Group: Placebo; Participant: A087; Age (years): 63.43; Sex: male** | | | | | | | | | |
| Gastric polyp | Gastrointestinal disorders | Gastric polyp | 2022-06-13 | 2022-04-24 | 6 | Grade 3 | Symptoms disappear without sequelae | Possibly unrelated | No |
| **Group: Placebo; Participant: A260; Age (years): 58.48; Sex: female** | | | | | | | | | |
| Endometrial malignant neoplasm, stage IB | Neoplasms benign, malignant and unspecified (incl cysts and polyps) | Endometrial cancer stage I | 2022-08-31 | 2022-04-27 | 6 | Grade 3 | Improved | Unrelated | No |
| **Group: Placebo; Participant: A282; Age (years): 64.09; Sex: female** | | | | | | | | | |
| Macular hole of the right eye | Eye disorders | Macular hole | 2022-05-24 | 2022-04-27 | 9 | Grade 3 | Symptoms disappear without sequelae | Possibly unrelated | No |
| **Group: Placebo; Participant: A360; Age (years): 66.81; Sex: female** | | | | | | | | | |
| Vasovagal syncope | Nervous system disorders | Syncope | 2022-07-10 | 2022-04-29 | 4 | Grade 3 | Improved | Possibly unrelated | No |
| **Group: Placebo; Participant: A383; Age (years): 67.81; Sex: female** | | | | | | | | | |
| Right hydronephrosis with ureteral calculus | Renal and urinary disorders | Hydronephrosis | 2022-08-08 | 2022-04-29 | 26 | Grade 3 | Symptoms disappear without sequelae | Possibly unrelated | No |
| Right hydronephrosis with ureteral calculus | Renal and urinary disorders | Ureterolithiasis | 2022-08-08 | 2022-04-29 | 26 | Grade 3 | Symptoms disappear without sequelae | Possibly unrelated | No |
| **Group: Placebo; Participant: A412; Age (years): 67.65; Sex: female** | | | | | | | | | |
| Herpes zoster neuralgia | Nervous system disorders | Post herpetic neuralgia | 2022-08-19 | 2022-05-05 | 12 | Grade 3 | Improved | Possibly unrelated | No |
| **Group: Placebo; Participant: A419; Age (years): 65.72; Sex: female** | | | | | | | | | |
| Gastritis erosive | Gastrointestinal disorders | Gastritis erosive | 2022-09-26 | 2022-05-05 | 5 | Grade 3 | Improved | Possibly unrelated | No |
| **Group: Placebo; Participant: A434; Age (years): 66.05; Sex: female** | | | | | | | | | |
| Angina unstable | Cardiac disorders | Angina unstable | 2022-10-19 | 2022-05-05 | 10 | Grade 3 | Improved | Unrelated | No |
| **Group: Placebo; Participant: A438; Age (years): 66.34; Sex: male** | | | | | | | | | |
| Membranous nephropathy | Renal and urinary disorders | Membranous glomerulonephritis | 2022-05-26 | 2022-05-05 | 5 | Grade 3 | Improved | Possibly unrelated | Yes |
| **Group: Placebo; Participant: A442; Age (years): 53.15; Sex: female** | | | | | | | | | | |
| Lumbar disc herniatio | Musculoskeletal and connective tissue disorders | Intervertebral disc protrusion | 2022-10-27 | 2022-05-05 | 9 | Grade 3 | Improved | Possibly unrelated | No | |

# [Table S6. Severity of overall adverse events within 30 days after vaccination](#eTable6)

| **Systemic organ categories (SOC)** | **50 μg dose(1) (N=150)[1]** | | | **100 μg dose(2) (N=149)** | | | **Placebo(3) (N=151)** | | | **Total (N=450)** | | | ***P*[2]*(1)VS(2)*** | ***P(1)VS(3)*** | ***P(2)VS(3)*** |  |
| --- | --- | --- | --- | --- | --- | --- | --- | --- | --- | --- | --- | --- | --- | --- | --- | --- |
| **Preferred term (PT)** | **nAE[3]** | **n[4]** | **(%)[5]** | **nAE** | **n** | **(%)** | **nAE** | **n** | **(%)** | **nAE** | **n** | **(%)** |  |
| **TEAE** | 111 | 59 | 39.33 | 146 | 58 | 38.93 | 76 | 43 | 28.48 | 333 | 160 | 35.56 | 1.0000 | 0.0519 | 0.0668 |  |
| Grade 1 | 62 | 39 | 26.00 | 85 | 45 | 30.20 | 41 | 25 | 16.56 | 188 | 109 | 24.22 | 0.4422 | 0.0494 | 0.0062 |  |
| Grade 2 | 49 | 32 | 21.33 | 45 | 28 | 18.79 | 31 | 26 | 17.22 | 125 | 86 | 19.11 | 0.6652 | 0.3840 | 0.7650 |  |
| Grade 3 | 0 | 0 | 0.00 | 16 | 6 | 4.03 | 4 | 4 | 2.65 | 20 | 10 | 2.22 | 0.0145 | 0.1225 | 0.5398 |  |
| **Systemic and local AEs** | 48 | 30 | 20.00 | 76 | 39 | 26.17 | 22 | 17 | 11.26 | 146 | 86 | 19.11 | 0.2191 | 0.0400 | 0.0010 |  |
| Grade 1 | 41 | 27 | 18.00 | 60 | 33 | 22.15 | 21 | 16 | 10.60 | 122 | 76 | 16.89 | 0.3895 | 0.0719 | 0.0078 |  |
| Grade 2 | 7 | 5 | 3.33 | 14 | 9 | 6.04 | 1 | 1 | 0.66 | 22 | 15 | 3.33 | 0.2892 | 0.1206 | 0.0101 |  |
| Grade 3 | 0 | 0 | 0.00 | 2 | 2 | 1.34 | 0 | 0 | 0.00 | 2 | 2 | 0.44 | 0.2475 | 1.0000 | 0.2458 |  |
| Injection-site pain | 16 | 15 | 10.00 | 37 | 26 | 17.45 | 7 | 7 | 4.64 | 60 | 48 | 10.67 | 0.0663 | 0.0807 | 0.0004 |  |
| Grade 1 | 16 | 15 | 10.00 | 36 | 25 | 16.78 | 7 | 7 | 4.64 | 59 | 47 | 10.44 | 0.0919 | 0.0807 | 0.0007 |  |
| Grade 2 | 0 | 0 | 0.00 | 1 | 1 | 0.67 | 0 | 0 | 0.00 | 1 | 1 | 0.22 | 0.4983 | 1.0000 | 0.4967 |  |
| Grade 3 | 0 | 0 | 0.00 | 0 | 0 | 0.00 | 0 | 0 | 0.00 | 0 | 0 | 0.00 | 1.0000 | 1.0000 | 1.0000 |  |
| Fatigue | 13 | 10 | 6.67 | 10 | 10 | 6.71 | 8 | 7 | 4.64 | 31 | 27 | 6.00 | 1.0000 | 0.4669 | 0.4654 |  |
| Grade 1 | 12 | 9 | 6.00 | 8 | 8 | 5.37 | 8 | 7 | 4.64 | 28 | 24 | 5.33 | 1.0000 | 0.6188 | 0.7975 |  |
| Grade 2 | 1 | 1 | 0.67 | 1 | 1 | 0.67 | 0 | 0 | 0.00 | 2 | 2 | 0.44 | 1.0000 | 0.4983 | 0.4967 |  |
| Grade 3 | 0 | 0 | 0.00 | 1 | 1 | 0.67 | 0 | 0 | 0.00 | 1 | 1 | 0.22 | 0.4983 | 1.0000 | 0.4967 |  |
| Injection-site itch | 5 | 5 | 3.33 | 9 | 8 | 5.37 | 4 | 3 | 1.99 | 18 | 16 | 3.56 | 0.4127 | 0.5012 | 0.1366 |  |
| Grade 1 | 5 | 5 | 3.33 | 7 | 7 | 4.70 | 4 | 3 | 1.99 | 16 | 15 | 3.33 | 0.5724 | 0.5012 | 0.2164 |  |
| Grade 2 | 0 | 0 | 0.00 | 2 | 2 | 1.34 | 0 | 0 | 0.00 | 2 | 2 | 0.44 | 0.2475 | 1.0000 | 0.2458 |  |
| Grade 3 |  |  |  |  |  |  |  |  |  |  |  |  |  |  |  |  |
| Injection-site redness | 2 | 1 | 0.67 | 9 | 8 | 5.37 | 0 | 0 | 0.00 | 11 | 9 | 2.00 | 0.0195 | 0.4983 | 0.0034 |  |
| Grade 1 | 1 | 1 | 0.67 | 4 | 4 | 2.68 | 0 | 0 | 0.00 | 5 | 5 | 1.11 | 0.2140 | 0.4983 | 0.0596 |  |
| Grade 2 | 1 | 1 | 0.67 | 4 | 3 | 2.01 | 0 | 0 | 0.00 | 5 | 4 | 0.89 | 0.3708 | 0.4983 | 0.1213 |  |
| Grade 3 | 0 | 0 | 0.00 | 1 | 1 | 0.67 | 0 | 0 | 0.00 | 1 | 1 | 0.22 | 0.4983 | 1.0000 | 0.4967 |  |
| Injection-site induration | 2 | 2 | 1.33 | 4 | 3 | 2.01 | 0 | 0 | 0.00 | 6 | 5 | 1.11 | 0.6843 | 0.4983 | 0.1213 |  |
| Grade 1 | 1 | 1 | 0.67 | 3 | 2 | 1.34 | 0 | 0 | 0.00 | 4 | 3 | 0.67 | 0.6225 | 0.4983 | 0.2458 |  |
| Grade 2 | 1 | 1 | 0.67 | 1 | 1 | 0.67 | 0 | 0 | 0.00 | 2 | 2 | 0.44 | 1.0000 | 0.4983 | 0.4967 |  |
| Grade 3 | 0 | 0 | 0.00 | 0 | 0 | 0.00 | 0 | 0 | 0.00 | 0 | 0 | 0.00 | 1.0000 | 1.0000 | 1.0000 |  |
| Chills | 4 | 4 | 2.67 | 0 | 0 | 0.00 | 0 | 0 | 0.00 | 4 | 4 | 0.89 | 0.1225 | 0.0604 | 1.0000 |  |
| Grade 1 | 3 | 3 | 2.00 | 0 | 0 | 0.00 | 0 | 0 | 0.00 | 3 | 3 | 0.67 | 0.2475 | 0.1225 | 1.0000 |  |
| Grade 2 | 1 | 1 | 0.67 | 0 | 0 | 0.00 | 0 | 0 | 0.00 | 1 | 1 | 0.22 | 1.0000 | 0.4983 | 1.0000 |  |
| Grade 3 | 0 | 0 | 0.00 | 0 | 0 | 0.00 | 0 | 0 | 0.00 | 0 | 0 | 0.00 | 1.0000 | 1.0000 | 1.0000 |  |
| Injection-site swelling | 1 | 1 | 0.67 | 2 | 2 | 1.34 | 1 | 1 | 0.66 | 4 | 4 | 0.89 | 0.6225 | 1.0000 | 0.6212 |  |
| Grade 1 | 0 | 0 | 0.00 | 0 | 0 | 0.00 | 1 | 1 | 0.66 | 1 | 1 | 0.22 | 1.0000 | 1.0000 | 1.0000 |  |
| Grade 2 | 1 | 1 | 0.67 | 2 | 2 | 1.34 | 0 | 0 | 0.00 | 3 | 3 | 0.67 | 0.6225 | 0.4983 | 0.2458 |  |
| Grade 3 | 0 | 0 | 0.00 | 0 | 0 | 0.00 | 0 | 0 | 0.00 | 0 | 0 | 0.00 | 1.0000 | 1.0000 | 1.0000 |  |
| Fever | 1 | 1 | 0.67 | 2 | 2 | 1.34 | 0 | 0 | 0.00 | 3 | 3 | 0.67 | 0.6225 | 0.4983 | 0.2458 |  |
| Grade 1 | 0 | 0 | 0.00 | 1 | 1 | 0.67 | 0 | 0 | 0.00 | 1 | 1 | 0.22 | 0.4983 | 1.0000 | 0.4967 |  |
| Grade 2 | 1 | 1 | 0.67 | 1 | 1 | 0.67 | 0 | 0 | 0.00 | 2 | 2 | 0.44 | 1.0000 | 0.4983 | 0.4967 |  |
| Grade 3 | 0 | 0 | 0.00 | 0 | 0 | 0.00 | 0 | 0 | 0.00 | 0 | 0 | 0.00 | 1.0000 | 1.0000 | 1.0000 |  |
| Injection-site discomfort | 1 | 1 | 0.67 | 1 | 1 | 0.67 | 0 | 0 | 0.00 | 2 | 2 | 0.44 | 1.0000 | 0.4983 | 0.4967 |  |
| Grade 1 | 1 | 1 | 0.67 | 1 | 1 | 0.67 | 0 | 0 | 0.00 | 2 | 2 | 0.44 | 1.0000 | 0.4983 | 0.4967 |  |
| Grade 2 | 0 | 0 | 0.00 | 0 | 0 | 0.00 | 0 | 0 | 0.00 | 0 | 0 | 0.00 | 1.0000 | 1.0000 | 1.0000 |  |
| Grade 3 | 0 | 0 | 0.00 | 0 | 0 | 0.00 | 0 | 0 | 0.00 | 0 | 0 | 0.00 | 1.0000 | 1.0000 | 1.0000 |  |
| Injection-site discoloration | 1 | 1 | 0.67 | 0 | 0 | 0.00 | 1 | 1 | 0.66 | 2 | 2 | 0.44 | 1.0000 | 1.0000 | 1.0000 |  |
| Grade 1 | 1 | 1 | 0.67 | 0 | 0 | 0.00 | 1 | 1 | 0.66 | 2 | 2 | 0.44 | 1.0000 | 1.0000 | 1.0000 |  |
| Grade 2 | 0 | 0 | 0.00 | 0 | 0 | 0.00 | 0 | 0 | 0.00 | 0 | 0 | 0.00 | 1.0000 | 1.0000 | 1.0000 |  |
| Grade 3 | 0 | 0 | 0.00 | 0 | 0 | 0.00 | 0 | 0 | 0.00 | 0 | 0 | 0.00 | 1.0000 | 1.0000 | 1.0000 |  |
| Chest pain | 0 | 0 | 0.00 | 2 | 2 | 1.34 | 0 | 0 | 0.00 | 2 | 2 | 0.44 | 0.2475 | 1.0000 | 0.2458 |  |
| Grade 1 | 0 | 0 | 0.00 | 0 | 0 | 0.00 | 0 | 0 | 0.00 | 0 | 0 | 0.00 | 1.0000 | 1.0000 | 1.0000 |  |
| Grade 2 | 0 | 0 | 0.00 | 2 | 2 | 1.34 | 0 | 0 | 0.00 | 2 | 2 | 0.44 | 0.2475 | 1.0000 | 0.2458 |  |
| Grade 3 | 0 | 0 | 0.00 | 0 | 0 | 0.00 | 0 | 0 | 0.00 | 0 | 0 | 0.00 | 1.0000 | 1.0000 | 1.0000 |  |
| Cyst | 0 | 0 | 0.00 | 0 | 0 | 0.00 | 1 | 1 | 0.66 | 1 | 1 | 0.22 | 1.0000 | 1.0000 | 1.0000 |  |
| Grade 1 | 0 | 0 | 0.00 | 0 | 0 | 0.00 | 0 | 0 | 0.00 | 0 | 0 | 0.00 | 1.0000 | 1.0000 | 1.0000 |  |
| Grade 2 | 0 | 0 | 0.00 | 0 | 0 | 0.00 | 1 | 1 | 0.66 | 1 | 1 | 0.22 | 1.0000 | 1.0000 | 1.0000 |  |
| Grade 3 | 0 | 0 | 0.00 | 0 | 0 | 0.00 | 0 | 0 | 0.00 | 0 | 0 | 0.00 | 1.0000 | 1.0000 | 1.0000 |  |
| Unspecified disease | 1 | 1 | 0.67 | 0 | 0 | 0.00 | 0 | 0 | 0.00 | 1 | 1 | 0.22 | 1.0000 | 0.4983 | 1.0000 |  |
| Grade 1 | 0 | 0 | 0.00 | 0 | 0 | 0.00 | 0 | 0 | 0.00 | 0 | 0 | 0.00 | 1.0000 | 1.0000 | 1.0000 |  |
| Grade 2 | 1 | 1 | 0.67 | 0 | 0 | 0.00 | 0 | 0 | 0.00 | 1 | 1 | 0.22 | 1.0000 | 0.4983 | 1.0000 |  |
| Grade 3 | 0 | 0 | 0.00 | 0 | 0 | 0.00 | 0 | 0 | 0.00 | 0 | 0 | 0.00 | 1.0000 | 1.0000 | 1.0000 |  |
| Chest discomfort | 1 | 1 | 0.67 | 0 | 0 | 0.00 | 0 | 0 | 0.00 | 1 | 1 | 0.22 | 1.0000 | 0.4983 | 1.0000 |  |
| Grade 1 | 1 | 1 | 0.67 | 0 | 0 | 0.00 | 0 | 0 | 0.00 | 1 | 1 | 0.22 | 1.0000 | 0.4983 | 1.0000 |  |
| Grade 2 | 0 | 0 | 0.00 | 0 | 0 | 0.00 | 0 | 0 | 0.00 | 0 | 0 | 0.00 | 1.0000 | 1.0000 | 1.0000 |  |
| Grade 3 | 0 | 0 | 0.00 | 0 | 0 | 0.00 | 0 | 0 | 0.00 | 0 | 0 | 0.00 | 1.0000 | 1.0000 | 1.0000 |  |
| **Gastrointestinal disorders** | 20 | 17 | 11.33 | 13 | 11 | 7.38 | 9 | 6 | 3.97 | 42 | 34 | 7.56 | 0.3211 | 0.0176 | 0.2219 |  |
| Grade 1 | 7 | 6 | 4.00 | 4 | 4 | 2.68 | 3 | 3 | 1.99 | 14 | 13 | 2.89 | 0.7497 | 0.3355 | 0.7219 |  |
| Grade 2 | 13 | 12 | 8.00 | 7 | 5 | 3.36 | 5 | 3 | 1.99 | 25 | 20 | 4.44 | 0.1320 | 0.0181 | 0.4997 |  |
| Grade 3 | 0 | 0 | 0.00 | 2 | 2 | 1.34 | 1 | 1 | 0.66 | 3 | 3 | 0.67 | 0.2475 | 1.0000 | 0.6212 |  |
| Diarrhea | 2 | 1 | 0.67 | 3 | 3 | 2.01 | 2 | 2 | 1.32 | 7 | 6 | 1.33 | 0.3708 | 1.0000 | 0.6833 |  |
| Grade 1 | 1 | 1 | 0.67 | 2 | 2 | 1.34 | 2 | 2 | 1.32 | 5 | 5 | 1.11 | 0.6225 | 1.0000 | 1.0000 |  |
| Grade 2 | 1 | 1 | 0.67 | 1 | 1 | 0.67 | 0 | 0 | 0.00 | 2 | 2 | 0.44 | 1.0000 | 0.4983 | 0.4967 |  |
| Grade 3 | 0 | 0 | 0.00 | 0 | 0 | 0.00 | 0 | 0 | 0.00 | 0 | 0 | 0.00 | 1.0000 | 1.0000 | 1.0000 |  |
| Abdominal pain | 2 | 2 | 1.33 | 2 | 2 | 1.34 | 1 | 1 | 0.66 | 5 | 5 | 1.11 | 1.0000 | 0.6225 | 0.6212 |  |
| Grade 1 | 2 | 2 | 1.33 | 1 | 1 | 0.67 | 1 | 1 | 0.66 | 4 | 4 | 0.89 | 1.0000 | 0.6225 | 1.0000 |  |
| Grade 2 | 0 | 0 | 0.00 | 1 | 1 | 0.67 | 0 | 0 | 0.00 | 1 | 1 | 0.22 | 0.4983 | 1.0000 | 0.4967 |  |
| Grade 3 | 0 | 0 | 0.00 | 0 | 0 | 0.00 | 0 | 0 | 0.00 | 0 | 0 | 0.00 | 1.0000 | 1.0000 | 1.0000 |  |
| Nausea | 3 | 3 | 2.00 | 1 | 1 | 0.67 | 0 | 0 | 0.00 | 4 | 4 | 0.89 | 0.6225 | 0.1225 | 0.4967 |  |
| Grade 1 | 2 | 2 | 1.33 | 0 | 0 | 0.00 | 0 | 0 | 0.00 | 2 | 2 | 0.44 | 0.4983 | 0.2475 | 1.0000 |  |
| Grade 2 | 1 | 1 | 0.67 | 0 | 0 | 0.00 | 0 | 0 | 0.00 | 1 | 1 | 0.22 | 1.0000 | 0.4983 | 1.0000 |  |
| Grade 3 | 0 | 0 | 0.00 | 1 | 1 | 0.67 | 0 | 0 | 0.00 | 1 | 1 | 0.22 | 0.4983 | 1.0000 | 0.4967 |  |
| Toothache | 3 | 3 | 2.00 | 0 | 0 | 0.00 | 1 | 1 | 0.66 | 4 | 4 | 0.89 | 0.2475 | 0.3708 | 1.0000 |  |
| Grade 1 | 0 | 0 | 0.00 | 0 | 0 | 0.00 | 0 | 0 | 0.00 | 0 | 0 | 0.00 | 1.0000 | 1.0000 | 1.0000 |  |
| Grade 2 | 3 | 3 | 2.00 | 0 | 0 | 0.00 | 1 | 1 | 0.66 | 4 | 4 | 0.89 | 0.2475 | 0.3708 | 1.0000 |  |
| Grade 3 | 0 | 0 | 0.00 | 0 | 0 | 0.00 | 0 | 0 | 0.00 | 0 | 0 | 0.00 | 1.0000 | 1.0000 | 1.0000 |  |
| Chronic gastritis | 2 | 2 | 1.33 | 0 | 0 | 0.00 | 1 | 1 | 0.66 | 3 | 3 | 0.67 | 0.4983 | 0.6225 | 1.0000 |  |
| Grade 1 | 0 | 0 | 0.00 | 0 | 0 | 0.00 | 0 | 0 | 0.00 | 0 | 0 | 0.00 | 1.0000 | 1.0000 | 1.0000 |  |
| Grade 2 | 2 | 2 | 1.33 | 0 | 0 | 0.00 | 1 | 1 | 0.66 | 3 | 3 | 0.67 | 0.4983 | 0.6225 | 1.0000 |  |
| Grade 3 | 0 | 0 | 0.00 | 0 | 0 | 0.00 | 0 | 0 | 0.00 | 0 | 0 | 0.00 | 1.0000 | 1.0000 | 1.0000 |  |
| Non-infectious gingivitis | 1 | 1 | 0.67 | 2 | 2 | 1.34 | 0 | 0 | 0.00 | 3 | 3 | 0.67 | 0.6225 | 0.4983 | 0.2458 |  |
| Grade 1 | 0 | 0 | 0.00 | 0 | 0 | 0.00 | 0 | 0 | 0.00 | 0 | 0 | 0.00 | 1.0000 | 1.0000 | 1.0000 |  |
| Grade 2 | 1 | 1 | 0.67 | 2 | 2 | 1.34 | 0 | 0 | 0.00 | 3 | 3 | 0.67 | 0.6225 | 0.4983 | 0.2458 |  |
| Grade 3 | 0 | 0 | 0.00 | 0 | 0 | 0.00 | 0 | 0 | 0.00 | 0 | 0 | 0.00 | 1.0000 | 1.0000 | 1.0000 |  |
| Oral ulcer | 1 | 1 | 0.67 | 1 | 1 | 0.67 | 0 | 0 | 0.00 | 2 | 2 | 0.44 | 1.0000 | 0.4983 | 0.4967 |  |
| Grade 1 | 0 | 0 | 0.00 | 0 | 0 | 0.00 | 0 | 0 | 0.00 | 0 | 0 | 0.00 | 1.0000 | 1.0000 | 1.0000 |  |
| Grade 2 | 1 | 1 | 0.67 | 1 | 1 | 0.67 | 0 | 0 | 0.00 | 2 | 2 | 0.44 | 1.0000 | 0.4983 | 0.4967 |  |
| Grade 3 | 0 | 0 | 0.00 | 0 | 0 | 0.00 | 0 | 0 | 0.00 | 0 | 0 | 0.00 | 1.0000 | 1.0000 | 1.0000 |  |
| Gingival pain | 1 | 1 | 0.67 | 1 | 1 | 0.67 | 0 | 0 | 0.00 | 2 | 2 | 0.44 | 1.0000 | 0.4983 | 0.4967 |  |
| Grade 1 | 0 | 0 | 0.00 | 1 | 1 | 0.67 | 0 | 0 | 0.00 | 1 | 1 | 0.22 | 1.0000 | 1.0000 | 0.4967 |  |
| Grade 2 | 1 | 1 | 0.67 | 0 | 0 | 0.00 | 0 | 0 | 0.00 | 1 | 1 | 0.22 | 1.0000 | 0.4983 | 1.0000 |  |
| Grade 3 | 0 | 0 | 0.00 | 0 | 0 | 0.00 | 0 | 0 | 0.00 | 0 | 0 | 0.00 | 1.0000 | 1.0000 | 1.0000 |  |
| Abdominal discomfort | 2 | 2 | 1.33 | 0 | 0 | 0.00 | 0 | 0 | 0.00 | 2 | 2 | 0.44 | 0.4983 | 0.2475 | 1.0000 |  |
| Grade 1 | 0 | 0 | 0.00 | 0 | 0 | 0.00 | 0 | 0 | 0.00 | 0 | 0 | 0.00 | 1.0000 | 1.0000 | 1.0000 |  |
| Grade 2 | 2 | 2 | 1.33 | 0 | 0 | 0.00 | 0 | 0 | 0.00 | 2 | 2 | 0.44 | 0.4983 | 0.2475 | 1.0000 |  |
| Grade 3 | 0 | 0 | 0.00 | 0 | 0 | 0.00 | 0 | 0 | 0.00 | 0 | 0 | 0.00 | 1.0000 | 1.0000 | 1.0000 |  |
| Oral hypoesthesia | 1 | 1 | 0.67 | 0 | 0 | 0.00 | 0 | 0 | 0.00 | 1 | 1 | 0.22 | 1.0000 | 0.4983 | 1.0000 |  |
| Grade 1 | 1 | 1 | 0.67 | 0 | 0 | 0.00 | 0 | 0 | 0.00 | 1 | 1 | 0.22 | 1.0000 | 0.4983 | 1.0000 |  |
| Grade 2 | 0 | 0 | 0.00 | 0 | 0 | 0.00 | 0 | 0 | 0.00 | 0 | 0 | 0.00 | 1.0000 | 1.0000 | 1.0000 |  |
| Grade 3 | 0 | 0 | 0.00 | 0 | 0 | 0.00 | 0 | 0 | 0.00 | 0 | 0 | 0.00 | 1.0000 | 1.0000 | 1.0000 |  |
| Vomiting | 1 | 1 | 0.67 | 0 | 0 | 0.00 | 0 | 0 | 0.00 | 1 | 1 | 0.22 | 1.0000 | 0.4983 | 1.0000 |  |
| Grade 1 | 1 | 1 | 0.67 | 0 | 0 | 0.00 | 0 | 0 | 0.00 | 1 | 1 | 0.22 | 1.0000 | 0.4983 | 1.0000 |  |
| Grade 2 | 0 | 0 | 0.00 | 0 | 0 | 0.00 | 0 | 0 | 0.00 | 0 | 0 | 0.00 | 1.0000 | 1.0000 | 1.0000 |  |
| Grade 3 | 0 | 0 | 0.00 | 0 | 0 | 0.00 | 0 | 0 | 0.00 | 0 | 0 | 0.00 | 1.0000 | 1.0000 | 1.0000 |  |
| Haemorrhoids | 0 | 0 | 0.00 | 0 | 0 | 0.00 | 1 | 1 | 0.66 | 1 | 1 | 0.22 | 1.0000 | 1.0000 | 1.0000 |  |
| Grade 1 | 0 | 0 | 0.00 | 0 | 0 | 0.00 | 0 | 0 | 0.00 | 0 | 0 | 0.00 | 1.0000 | 1.0000 | 1.0000 |  |
| Grade 2 | 0 | 0 | 0.00 | 0 | 0 | 0.00 | 1 | 1 | 0.66 | 1 | 1 | 0.22 | 1.0000 | 1.0000 | 1.0000 |  |
| Grade 3 | 0 | 0 | 0.00 | 0 | 0 | 0.00 | 0 | 0 | 0.00 | 0 | 0 | 0.00 | 1.0000 | 1.0000 | 1.0000 |  |
| Gastric polyp | 0 | 0 | 0.00 | 0 | 0 | 0.00 | 1 | 1 | 0.66 | 1 | 1 | 0.22 | 1.0000 | 1.0000 | 1.0000 |  |
| Grade 1 | 0 | 0 | 0.00 | 0 | 0 | 0.00 | 0 | 0 | 0.00 | 0 | 0 | 0.00 | 1.0000 | 1.0000 | 1.0000 |  |
| Grade 2 | 0 | 0 | 0.00 | 0 | 0 | 0.00 | 0 | 0 | 0.00 | 0 | 0 | 0.00 | 1.0000 | 1.0000 | 1.0000 |  |
| Grade 3 | 0 | 0 | 0.00 | 0 | 0 | 0.00 | 1 | 1 | 0.66 | 1 | 1 | 0.22 | 1.0000 | 1.0000 | 1.0000 |  |
| Gastric ulcer | 0 | 0 | 0.00 | 0 | 0 | 0.00 | 1 | 1 | 0.66 | 1 | 1 | 0.22 | 1.0000 | 1.0000 | 1.0000 |  |
| Grade 1 | 0 | 0 | 0.00 | 0 | 0 | 0.00 | 0 | 0 | 0.00 | 0 | 0 | 0.00 | 1.0000 | 1.0000 | 1.0000 |  |
| Grade 2 | 0 | 0 | 0.00 | 0 | 0 | 0.00 | 1 | 1 | 0.66 | 1 | 1 | 0.22 | 1.0000 | 1.0000 | 1.0000 |  |
| Grade 3 | 0 | 0 | 0.00 | 0 | 0 | 0.00 | 0 | 0 | 0.00 | 0 | 0 | 0.00 | 1.0000 | 1.0000 | 1.0000 |  |
| Gastroesophageal reflux disease | 0 | 0 | 0.00 | 1 | 1 | 0.67 | 0 | 0 | 0.00 | 1 | 1 | 0.22 | 0.4983 | 1.0000 | 0.4967 |  |
| Grade 1 | 0 | 0 | 0.00 | 0 | 0 | 0.00 | 0 | 0 | 0.00 | 0 | 0 | 0.00 | 1.0000 | 1.0000 | 1.0000 |  |
| Grade 2 | 0 | 0 | 0.00 | 1 | 1 | 0.67 | 0 | 0 | 0.00 | 1 | 1 | 0.22 | 0.4983 | 1.0000 | 0.4967 |  |
| Grade 3 | 0 | 0 | 0.00 | 0 | 0 | 0.00 | 0 | 0 | 0.00 | 0 | 0 | 0.00 | 1.0000 | 1.0000 | 1.0000 |  |
| Abdominal distension | 0 | 0 | 0.00 | 1 | 1 | 0.67 | 0 | 0 | 0.00 | 1 | 1 | 0.22 | 0.4983 | 1.0000 | 0.4967 |  |
| Grade 1 | 0 | 0 | 0.00 | 0 | 0 | 0.00 | 0 | 0 | 0.00 | 0 | 0 | 0.00 | 1.0000 | 1.0000 | 1.0000 |  |
| Grade 2 | 0 | 0 | 0.00 | 1 | 1 | 0.67 | 0 | 0 | 0.00 | 1 | 1 | 0.22 | 0.4983 | 1.0000 | 0.4967 |  |
| Grade 3 | 0 | 0 | 0.00 | 0 | 0 | 0.00 | 0 | 0 | 0.00 | 0 | 0 | 0.00 | 1.0000 | 1.0000 | 1.0000 |  |
| Tongue disorders | 0 | 0 | 0.00 | 1 | 1 | 0.67 | 0 | 0 | 0.00 | 1 | 1 | 0.22 | 0.4983 | 1.0000 | 0.4967 |  |
| Grade 1 | 0 | 0 | 0.00 | 0 | 0 | 0.00 | 0 | 0 | 0.00 | 0 | 0 | 0.00 | 1.0000 | 1.0000 | 1.0000 |  |
| Grade 2 | 0 | 0 | 0.00 | 0 | 0 | 0.00 | 0 | 0 | 0.00 | 0 | 0 | 0.00 | 1.0000 | 1.0000 | 1.0000 |  |
| Grade 3 | 0 | 0 | 0.00 | 1 | 1 | 0.67 | 0 | 0 | 0.00 | 1 | 1 | 0.22 | 0.4983 | 1.0000 | 0.4967 |  |
| Hiatus hernia | 0 | 0 | 0.00 | 0 | 0 | 0.00 | 1 | 1 | 0.66 | 1 | 1 | 0.22 | 1.0000 | 1.0000 | 1.0000 |  |
| Grade 1 | 0 | 0 | 0.00 | 0 | 0 | 0.00 | 0 | 0 | 0.00 | 0 | 0 | 0.00 | 1.0000 | 1.0000 | 1.0000 |  |
| Grade 2 | 0 | 0 | 0.00 | 0 | 0 | 0.00 | 1 | 1 | 0.66 | 1 | 1 | 0.22 | 1.0000 | 1.0000 | 1.0000 |  |
| Grade 3 | 0 | 0 | 0.00 | 0 | 0 | 0.00 | 0 | 0 | 0.00 | 0 | 0 | 0.00 | 1.0000 | 1.0000 | 1.0000 |  |
| Dental caries | 1 | 1 | 0.67 | 0 | 0 | 0.00 | 0 | 0 | 0.00 | 1 | 1 | 0.22 | 1.0000 | 0.4983 | 1.0000 |  |
| Grade 1 | 0 | 0 | 0.00 | 0 | 0 | 0.00 | 0 | 0 | 0.00 | 0 | 0 | 0.00 | 1.0000 | 1.0000 | 1.0000 |  |
| Grade 2 | 1 | 1 | 0.67 | 0 | 0 | 0.00 | 0 | 0 | 0.00 | 1 | 1 | 0.22 | 1.0000 | 0.4983 | 1.0000 |  |
| Grade 3 | 0 | 0 | 0.00 | 0 | 0 | 0.00 | 0 | 0 | 0.00 | 0 | 0 | 0.00 | 1.0000 | 1.0000 | 1.0000 |  |
| **Nervous system disorders** | 9 | 7 | 4.67 | 14 | 10 | 6.71 | 11 | 9 | 5.96 | 34 | 26 | 5.78 | 0.4668 | 0.7982 | 0.8171 |  |
| Grade 1 | 2 | 2 | 1.33 | 5 | 5 | 3.36 | 7 | 6 | 3.97 | 14 | 13 | 2.89 | 0.2824 | 0.2825 | 1.0000 |  |
| Grade 2 | 7 | 5 | 3.33 | 6 | 4 | 2.68 | 4 | 3 | 1.99 | 17 | 12 | 2.67 | 1.0000 | 0.5012 | 0.7219 |  |
| Grade 3 | 0 | 0 | 0.00 | 3 | 2 | 1.34 | 0 | 0 | 0.00 | 3 | 2 | 0.44 | 0.2475 | 1.0000 | 0.2458 |  |
| Headache | 6 | 5 | 3.33 | 7 | 6 | 4.03 | 7 | 6 | 3.97 | 20 | 17 | 3.78 | 0.7698 | 1.0000 | 1.0000 |  |
| Grade 1 | 1 | 1 | 0.67 | 1 | 1 | 0.67 | 5 | 4 | 2.65 | 7 | 6 | 1.33 | 1.0000 | 0.3708 | 0.3709 |  |
| Grade 2 | 5 | 4 | 2.67 | 4 | 3 | 2.01 | 2 | 2 | 1.32 | 11 | 9 | 2.00 | 1.0000 | 0.4476 | 0.6833 |  |
| Grade 3 | 0 | 0 | 0.00 | 2 | 2 | 1.34 | 0 | 0 | 0.00 | 2 | 2 | 0.44 | 0.2475 | 1.0000 | 0.2458 |  |
| Dizziness | 1 | 1 | 0.67 | 6 | 6 | 4.03 | 3 | 3 | 1.99 | 10 | 10 | 2.22 | 0.0667 | 0.6225 | 0.3338 |  |
| Grade 1 | 1 | 1 | 0.67 | 4 | 4 | 2.68 | 1 | 1 | 0.66 | 6 | 6 | 1.33 | 0.2140 | 1.0000 | 0.2125 |  |
| Grade 2 | 0 | 0 | 0.00 | 2 | 2 | 1.34 | 2 | 2 | 1.32 | 4 | 4 | 0.89 | 0.2475 | 0.4983 | 1.0000 |  |
| Grade 3 | 0 | 0 | 0.00 | 0 | 0 | 0.00 | 0 | 0 | 0.00 | 0 | 0 | 0.00 | 1.0000 | 1.0000 | 1.0000 |  |
| Migraine | 0 | 0 | 0.00 | 1 | 1 | 0.67 | 0 | 0 | 0.00 | 1 | 1 | 0.22 | 0.4983 | 1.0000 | 0.4967 |  |
| Grade 1 | 0 | 0 | 0.00 | 0 | 0 | 0.00 | 0 | 0 | 0.00 | 0 | 0 | 0.00 | 1.0000 | 1.0000 | 1.0000 |  |
| Grade 2 | 0 | 0 | 0.00 | 0 | 0 | 0.00 | 0 | 0 | 0.00 | 0 | 0 | 0.00 | 1.0000 | 1.0000 | 1.0000 |  |
| Grade 3 | 0 | 0 | 0.00 | 1 | 1 | 0.67 | 0 | 0 | 0.00 | 1 | 1 | 0.22 | 0.4983 | 1.0000 | 0.4967 |  |
| Dysgeusia | 0 | 0 | 0.00 | 0 | 0 | 0.00 | 1 | 1 | 0.66 | 1 | 1 | 0.22 | 1.0000 | 1.0000 | 1.0000 |  |
| Grade 1 | 0 | 0 | 0.00 | 0 | 0 | 0.00 | 1 | 1 | 0.66 | 1 | 1 | 0.22 | 1.0000 | 1.0000 | 1.0000 |  |
| Grade 2 | 0 | 0 | 0.00 | 0 | 0 | 0.00 | 0 | 0 | 0.00 | 0 | 0 | 0.00 | 1.0000 | 1.0000 | 1.0000 |  |
| Grade 3 | 0 | 0 | 0.00 | 0 | 0 | 0.00 | 0 | 0 | 0.00 | 0 | 0 | 0.00 | 1.0000 | 1.0000 | 1.0000 |  |
| Chronic inflammatory demyelinating polyneuropathy | 1 | 1 | 0.67 | 0 | 0 | 0.00 | 0 | 0 | 0.00 | 1 | 1 | 0.22 | 1.0000 | 0.4983 | 1.0000 |  |
| Grade 1 | 0 | 0 | 0.00 | 0 | 0 | 0.00 | 0 | 0 | 0.00 | 0 | 0 | 0.00 | 1.0000 | 1.0000 | 1.0000 |  |
| Grade 2 | 1 | 1 | 0.67 | 0 | 0 | 0.00 | 0 | 0 | 0.00 | 1 | 1 | 0.22 | 1.0000 | 0.4983 | 1.0000 |  |
| Grade 3 | 0 | 0 | 0.00 | 0 | 0 | 0.00 | 0 | 0 | 0.00 | 0 | 0 | 0.00 | 1.0000 | 1.0000 | 1.0000 |  |
| Lacunar infarction | 1 | 1 | 0.67 | 0 | 0 | 0.00 | 0 | 0 | 0.00 | 1 | 1 | 0.22 | 1.0000 | 0.4983 | 1.0000 |  |
| Grade 1 | 0 | 0 | 0.00 | 0 | 0 | 0.00 | 0 | 0 | 0.00 | 0 | 0 | 0.00 | 1.0000 | 1.0000 | 1.0000 |  |
| Grade 2 | 1 | 1 | 0.67 | 0 | 0 | 0.00 | 0 | 0 | 0.00 | 1 | 1 | 0.22 | 1.0000 | 0.4983 | 1.0000 |  |
| Grade 3 | 0 | 0 | 0.00 | 0 | 0 | 0.00 | 0 | 0 | 0.00 | 0 | 0 | 0.00 | 1.0000 | 1.0000 | 1.0000 |  |
| **Musculoskeletal and connective tissue disorders** | 8 | 8 | 5.33 | 10 | 8 | 5.37 | 6 | 4 | 2.65 | 24 | 20 | 4.44 | 1.0000 | 0.2562 | 0.2546 |  |
| Grade 1 | 4 | 4 | 2.67 | 3 | 3 | 2.01 | 4 | 2 | 1.32 | 11 | 9 | 2.00 | 1.0000 | 0.4476 | 0.6833 |  |
| Grade 2 | 4 | 4 | 2.67 | 4 | 4 | 2.68 | 2 | 2 | 1.32 | 10 | 10 | 2.22 | 1.0000 | 0.4476 | 0.4460 |  |
| Grade 3 | 0 | 0 | 0.00 | 3 | 2 | 1.34 | 0 | 0 | 0.00 | 3 | 2 | 0.44 | 0.2475 | 1.0000 | 0.2458 |  |
| Myalgia | 3 | 3 | 2.00 | 3 | 3 | 2.01 | 3 | 2 | 1.32 | 9 | 8 | 1.78 | 1.0000 | 0.6844 | 0.6833 |  |
| Grade 1 | 2 | 2 | 1.33 | 2 | 2 | 1.34 | 2 | 1 | 0.66 | 6 | 5 | 1.11 | 1.0000 | 0.6225 | 0.6212 |  |
| Grade 2 | 1 | 1 | 0.67 | 0 | 0 | 0.00 | 1 | 1 | 0.66 | 2 | 2 | 0.44 | 1.0000 | 1.0000 | 1.0000 |  |
| Grade 3 | 0 | 0 | 0.00 | 1 | 1 | 0.67 | 0 | 0 | 0.00 | 1 | 1 | 0.22 | 0.4983 | 1.0000 | 0.4967 |  |
| Spinal osteoarthritis | 0 | 0 | 0.00 | 3 | 3 | 2.01 | 0 | 0 | 0.00 | 3 | 3 | 0.67 | 0.1225 | 1.0000 | 0.1213 |  |
| Grade 1 | 0 | 0 | 0.00 | 1 | 1 | 0.67 | 0 | 0 | 0.00 | 1 | 1 | 0.22 | 0.4983 | 1.0000 | 0.4967 |  |
| Grade 2 | 0 | 0 | 0.00 | 1 | 1 | 0.67 | 0 | 0 | 0.00 | 1 | 1 | 0.22 | 0.4983 | 1.0000 | 0.4967 |  |
| Grade 3 | 0 | 0 | 0.00 | 1 | 1 | 0.67 | 0 | 0 | 0.00 | 1 | 1 | 0.22 | 0.4983 | 1.0000 | 0.4967 |  |
| Intervertebral disc protrusion | 1 | 1 | 0.67 | 1 | 1 | 0.67 | 0 | 0 | 0.00 | 2 | 2 | 0.44 | 1.0000 | 0.4983 | 0.4967 |  |
| Grade 1 | 0 | 0 | 0.00 | 0 | 0 | 0.00 | 0 | 0 | 0.00 | 0 | 0 | 0.00 | 1.0000 | 1.0000 | 1.0000 |  |
| Grade 2 | 1 | 1 | 0.67 | 0 | 0 | 0.00 | 0 | 0 | 0.00 | 1 | 1 | 0.22 | 1.0000 | 0.4983 | 1.0000 |  |
| Grade 3 | 0 | 0 | 0.00 | 1 | 1 | 0.67 | 0 | 0 | 0.00 | 1 | 1 | 0.22 | 0.4983 | 1.0000 | 0.4967 |  |
| Pain in extremity | 0 | 0 | 0.00 | 1 | 1 | 0.67 | 1 | 1 | 0.66 | 2 | 2 | 0.44 | 0.4983 | 1.0000 | 1.0000 |  |
| Grade 1 | 0 | 0 | 0.00 | 0 | 0 | 0.00 | 0 | 0 | 0.00 | 0 | 0 | 0.00 | 1.0000 | 1.0000 | 1.0000 |  |
| Grade 2 | 0 | 0 | 0.00 | 1 | 1 | 0.67 | 1 | 1 | 0.66 | 2 | 2 | 0.44 | 0.4983 | 1.0000 | 1.0000 |  |
| Grade 3 | 0 | 0 | 0.00 | 0 | 0 | 0.00 | 0 | 0 | 0.00 | 0 | 0 | 0.00 | 1.0000 | 1.0000 | 1.0000 |  |
| Back pain | 2 | 2 | 1.33 | 0 | 0 | 0.00 | 0 | 0 | 0.00 | 2 | 2 | 0.44 | 0.4983 | 0.2475 | 1.0000 |  |
| Grade 1 | 0 | 0 | 0.00 | 0 | 0 | 0.00 | 0 | 0 | 0.00 | 0 | 0 | 0.00 | 1.0000 | 1.0000 | 1.0000 |  |
| Grade 2 | 2 | 2 | 1.33 | 0 | 0 | 0.00 | 0 | 0 | 0.00 | 2 | 2 | 0.44 | 0.4983 | 0.2475 | 1.0000 |  |
| Grade 3 | 0 | 0 | 0.00 | 0 | 0 | 0.00 | 0 | 0 | 0.00 | 0 | 0 | 0.00 | 1.0000 | 1.0000 | 1.0000 |  |
| Arthralgia | 0 | 0 | 0.00 | 0 | 0 | 0.00 | 1 | 1 | 0.66 | 1 | 1 | 0.22 | 1.0000 | 1.0000 | 1.0000 |  |
| Grade 1 | 0 | 0 | 0.00 | 0 | 0 | 0.00 | 1 | 1 | 0.66 | 1 | 1 | 0.22 | 1.0000 | 1.0000 | 1.0000 |  |
| Grade 2 | 0 | 0 | 0.00 | 0 | 0 | 0.00 | 0 | 0 | 0.00 | 0 | 0 | 0.00 | 1.0000 | 1.0000 | 1.0000 |  |
| Grade 3 | 0 | 0 | 0.00 | 0 | 0 | 0.00 | 0 | 0 | 0.00 | 0 | 0 | 0.00 | 1.0000 | 1.0000 | 1.0000 |  |
| Joint swelling | 0 | 0 | 0.00 | 1 | 1 | 0.67 | 0 | 0 | 0.00 | 1 | 1 | 0.22 | 0.4983 | 1.0000 | 0.4967 |  |
| Grade 1 | 0 | 0 | 0.00 | 0 | 0 | 0.00 | 0 | 0 | 0.00 | 0 | 0 | 0.00 | 1.0000 | 1.0000 | 1.0000 |  |
| Grade 2 | 0 | 0 | 0.00 | 1 | 1 | 0.67 | 0 | 0 | 0.00 | 1 | 1 | 0.22 | 0.4983 | 1.0000 | 0.4967 |  |
| Grade 3 | 0 | 0 | 0.00 | 0 | 0 | 0.00 | 0 | 0 | 0.00 | 0 | 0 | 0.00 | 1.0000 | 1.0000 | 1.0000 |  |
| Muscular weakness | 1 | 1 | 0.67 | 0 | 0 | 0.00 | 0 | 0 | 0.00 | 1 | 1 | 0.22 | 1.0000 | 0.4983 | 1.0000 |  |
| Grade 1 | 1 | 1 | 0.67 | 0 | 0 | 0.00 | 0 | 0 | 0.00 | 1 | 1 | 0.22 | 1.0000 | 0.4983 | 1.0000 |  |
| Grade 2 | 0 | 0 | 0.00 | 0 | 0 | 0.00 | 0 | 0 | 0.00 | 0 | 0 | 0.00 | 1.0000 | 1.0000 | 1.0000 |  |
| Grade 3 | 0 | 0 | 0.00 | 0 | 0 | 0.00 | 0 | 0 | 0.00 | 0 | 0 | 0.00 | 1.0000 | 1.0000 | 1.0000 |  |
| Myositis | 0 | 0 | 0.00 | 1 | 1 | 0.67 | 0 | 0 | 0.00 | 1 | 1 | 0.22 | 0.4983 | 1.0000 | 0.4967 |  |
| Grade 1 | 0 | 0 | 0.00 | 0 | 0 | 0.00 | 0 | 0 | 0.00 | 0 | 0 | 0.00 | 1.0000 | 1.0000 | 1.0000 |  |
| Grade 2 | 0 | 0 | 0.00 | 1 | 1 | 0.67 | 0 | 0 | 0.00 | 1 | 1 | 0.22 | 0.4983 | 1.0000 | 0.4967 |  |
| Grade 3 | 0 | 0 | 0.00 | 0 | 0 | 0.00 | 0 | 0 | 0.00 | 0 | 0 | 0.00 | 1.0000 | 1.0000 | 1.0000 |  |
| Tenosynovitis | 1 | 1 | 0.67 | 0 | 0 | 0.00 | 0 | 0 | 0.00 | 1 | 1 | 0.22 | 1.0000 | 0.4983 | 1.0000 |  |
| Grade 1 | 1 | 1 | 0.67 | 0 | 0 | 0.00 | 0 | 0 | 0.00 | 1 | 1 | 0.22 | 1.0000 | 0.4983 | 1.0000 |  |
| Grade 2 | 0 | 0 | 0.00 | 0 | 0 | 0.00 | 0 | 0 | 0.00 | 0 | 0 | 0.00 | 1.0000 | 1.0000 | 1.0000 |  |
| Grade 3 | 0 | 0 | 0.00 | 0 | 0 | 0.00 | 0 | 0 | 0.00 | 0 | 0 | 0.00 | 1.0000 | 1.0000 | 1.0000 |  |
| Neck pain | 0 | 0 | 0.00 | 0 | 0 | 0.00 | 1 | 1 | 0.66 | 1 | 1 | 0.22 | 1.0000 | 1.0000 | 1.0000 |  |
| Grade 1 | 0 | 0 | 0.00 | 0 | 0 | 0.00 | 1 | 1 | 0.66 | 1 | 1 | 0.22 | 1.0000 | 1.0000 | 1.0000 |  |
| Grade 2 | 0 | 0 | 0.00 | 0 | 0 | 0.00 | 0 | 0 | 0.00 | 0 | 0 | 0.00 | 1.0000 | 1.0000 | 1.0000 |  |
| Grade 3 | 0 | 0 | 0.00 | 0 | 0 | 0.00 | 0 | 0 | 0.00 | 0 | 0 | 0.00 | 1.0000 | 1.0000 | 1.0000 |  |
| **Infections and infestations** | 4 | 4 | 2.67 | 9 | 8 | 5.37 | 8 | 8 | 5.30 | 21 | 20 | 4.44 | 0.2562 | 0.3779 | 1.0000 |  |
| Grade 1 | 1 | 1 | 0.67 | 2 | 2 | 1.34 | 1 | 1 | 0.66 | 4 | 4 | 0.89 | 0.6225 | 1.0000 | 0.6212 |  |
| Grade 2 | 3 | 3 | 2.00 | 7 | 6 | 4.03 | 6 | 6 | 3.97 | 16 | 15 | 3.33 | 0.3354 | 0.5012 | 1.0000 |  |
| Grade 3 | 0 | 0 | 0.00 | 0 | 0 | 0.00 | 1 | 1 | 0.66 | 1 | 1 | 0.22 | 1.0000 | 1.0000 | 1.0000 |  |
| Nasopharyngitis | 3 | 3 | 2.00 | 2 | 2 | 1.34 | 2 | 2 | 1.32 | 7 | 7 | 1.56 | 1.0000 | 0.6844 | 1.0000 |  |
| Grade 1 | 1 | 1 | 0.67 | 1 | 1 | 0.67 | 0 | 0 | 0.00 | 2 | 2 | 0.44 | 1.0000 | 0.4983 | 0.4967 |  |
| Grade 2 | 2 | 2 | 1.33 | 1 | 1 | 0.67 | 2 | 2 | 1.32 | 5 | 5 | 1.11 | 1.0000 | 1.0000 | 1.0000 |  |
| Grade 3 | 0 | 0 | 0.00 | 0 | 0 | 0.00 | 0 | 0 | 0.00 | 0 | 0 | 0.00 | 1.0000 | 1.0000 | 1.0000 |  |
| Upper respiratory tract infection | 0 | 0 | 0.00 | 2 | 2 | 1.34 | 0 | 0 | 0.00 | 2 | 2 | 0.44 | 0.2475 | 1.0000 | 0.2458 |  |
| Grade 1 | 0 | 0 | 0.00 | 1 | 1 | 0.67 | 0 | 0 | 0.00 | 1 | 1 | 0.22 | 0.4983 | 1.0000 | 0.4967 |  |
| Grade 2 | 0 | 0 | 0.00 | 1 | 1 | 0.67 | 0 | 0 | 0.00 | 1 | 1 | 0.22 | 0.4983 | 1.0000 | 0.4967 |  |
| Grade 3 | 0 | 0 | 0.00 | 0 | 0 | 0.00 | 0 | 0 | 0.00 | 0 | 0 | 0.00 | 1.0000 | 1.0000 | 1.0000 |  |
| Pharyngitis | 0 | 0 | 0.00 | 1 | 1 | 0.67 | 1 | 1 | 0.66 | 2 | 2 | 0.44 | 0.4983 | 1.0000 | 1.0000 |  |
| Grade 1 | 0 | 0 | 0.00 | 0 | 0 | 0.00 | 0 | 0 | 0.00 | 0 | 0 | 0.00 | 1.0000 | 1.0000 | 1.0000 |  |
| Grade 2 | 0 | 0 | 0.00 | 1 | 1 | 0.67 | 1 | 1 | 0.66 | 2 | 2 | 0.44 | 0.4983 | 1.0000 | 1.0000 |  |
| Grade 3 | 0 | 0 | 0.00 | 0 | 0 | 0.00 | 0 | 0 | 0.00 | 0 | 0 | 0.00 | 1.0000 | 1.0000 | 1.0000 |  |
| Herpes zoster | 0 | 0 | 0.00 | 0 | 0 | 0.00 | 2 | 2 | 1.32 | 2 | 2 | 0.44 | 1.0000 | 0.4983 | 0.4984 |  |
| Grade 1 | 0 | 0 | 0.00 | 0 | 0 | 0.00 | 0 | 0 | 0.00 | 0 | 0 | 0.00 | 1.0000 | 1.0000 | 1.0000 |  |
| Grade 2 | 0 | 0 | 0.00 | 0 | 0 | 0.00 | 1 | 1 | 0.66 | 1 | 1 | 0.22 | 1.0000 | 1.0000 | 1.0000 |  |
| Grade 3 | 0 | 0 | 0.00 | 0 | 0 | 0.00 | 1 | 1 | 0.66 | 1 | 1 | 0.22 | 1.0000 | 1.0000 | 1.0000 |  |
| Oral herpes | 0 | 0 | 0.00 | 0 | 0 | 0.00 | 1 | 1 | 0.66 | 1 | 1 | 0.22 | 1.0000 | 1.0000 | 1.0000 |  |
| Grade 1 | 0 | 0 | 0.00 | 0 | 0 | 0.00 | 1 | 1 | 0.66 | 1 | 1 | 0.22 | 1.0000 | 1.0000 | 1.0000 |  |
| Grade 2 | 0 | 0 | 0.00 | 0 | 0 | 0.00 | 0 | 0 | 0.00 | 0 | 0 | 0.00 | 1.0000 | 1.0000 | 1.0000 |  |
| Grade 3 | 0 | 0 | 0.00 | 0 | 0 | 0.00 | 0 | 0 | 0.00 | 0 | 0 | 0.00 | 1.0000 | 1.0000 | 1.0000 |  |
| Respiratory tract infection | 0 | 0 | 0.00 | 1 | 1 | 0.67 | 0 | 0 | 0.00 | 1 | 1 | 0.22 | 0.4983 | 1.0000 | 0.4967 |  |
| Grade 1 | 0 | 0 | 0.00 | 0 | 0 | 0.00 | 0 | 0 | 0.00 | 0 | 0 | 0.00 | 1.0000 | 1.0000 | 1.0000 |  |
| Grade 2 | 0 | 0 | 0.00 | 1 | 1 | 0.67 | 0 | 0 | 0.00 | 1 | 1 | 0.22 | 0.4983 | 1.0000 | 0.4967 |  |
| Grade 3 | 0 | 0 | 0.00 | 0 | 0 | 0.00 | 0 | 0 | 0.00 | 0 | 0 | 0.00 | 1.0000 | 1.0000 | 1.0000 |  |
| Chronic otitis media | 0 | 0 | 0.00 | 0 | 0 | 0.00 | 1 | 1 | 0.66 | 1 | 1 | 0.22 | 1.0000 | 1.0000 | 1.0000 |  |
| Grade 1 | 0 | 0 | 0.00 | 0 | 0 | 0.00 | 0 | 0 | 0.00 | 0 | 0 | 0.00 | 1.0000 | 1.0000 | 1.0000 |  |
| Grade 2 | 0 | 0 | 0.00 | 0 | 0 | 0.00 | 1 | 1 | 0.66 | 1 | 1 | 0.22 | 1.0000 | 1.0000 | 1.0000 |  |
| Grade 3 | 0 | 0 | 0.00 | 0 | 0 | 0.00 | 0 | 0 | 0.00 | 0 | 0 | 0.00 | 1.0000 | 1.0000 | 1.0000 |  |
| Bronchitis | 0 | 0 | 0.00 | 0 | 0 | 0.00 | 1 | 1 | 0.66 | 1 | 1 | 0.22 | 1.0000 | 1.0000 | 1.0000 |  |
| Grade 1 | 0 | 0 | 0.00 | 0 | 0 | 0.00 | 0 | 0 | 0.00 | 0 | 0 | 0.00 | 1.0000 | 1.0000 | 1.0000 |  |
| Grade 2 | 0 | 0 | 0.00 | 0 | 0 | 0.00 | 1 | 1 | 0.66 | 1 | 1 | 0.22 | 1.0000 | 1.0000 | 1.0000 |  |
| Grade 3 | 0 | 0 | 0.00 | 0 | 0 | 0.00 | 0 | 0 | 0.00 | 0 | 0 | 0.00 | 1.0000 | 1.0000 | 1.0000 |  |
| Periodontitis | 1 | 1 | 0.67 | 0 | 0 | 0.00 | 0 | 0 | 0.00 | 1 | 1 | 0.22 | 1.0000 | 0.4983 | 1.0000 |  |
| Grade 1 | 0 | 0 | 0.00 | 0 | 0 | 0.00 | 0 | 0 | 0.00 | 0 | 0 | 0.00 | 1.0000 | 1.0000 | 1.0000 |  |
| Grade 2 | 1 | 1 | 0.67 | 0 | 0 | 0.00 | 0 | 0 | 0.00 | 1 | 1 | 0.22 | 1.0000 | 0.4983 | 1.0000 |  |
| Grade 3 | 0 | 0 | 0.00 | 0 | 0 | 0.00 | 0 | 0 | 0.00 | 0 | 0 | 0.00 | 1.0000 | 1.0000 | 1.0000 |  |
| Periungual dermatophytosis | 0 | 0 | 0.00 | 2 | 1 | 0.67 | 0 | 0 | 0.00 | 2 | 1 | 0.22 | 0.4983 | 1.0000 | 0.4967 |  |
| Grade 1 | 0 | 0 | 0.00 | 0 | 0 | 0.00 | 0 | 0 | 0.00 | 0 | 0 | 0.00 | 1.0000 | 1.0000 | 1.0000 |  |
| Grade 2 | 0 | 0 | 0.00 | 2 | 1 | 0.67 | 0 | 0 | 0.00 | 2 | 1 | 0.22 | 0.4983 | 1.0000 | 0.4967 |  |
| Grade 3 | 0 | 0 | 0.00 | 0 | 0 | 0.00 | 0 | 0 | 0.00 | 0 | 0 | 0.00 | 1.0000 | 1.0000 | 1.0000 |  |
| Helicobacter infection | 0 | 0 | 0.00 | 1 | 1 | 0.67 | 0 | 0 | 0.00 | 1 | 1 | 0.22 | 0.4983 | 1.0000 | 0.4967 |  |
| Grade 1 | 0 | 0 | 0.00 | 0 | 0 | 0.00 | 0 | 0 | 0.00 | 0 | 0 | 0.00 | 1.0000 | 1.0000 | 1.0000 |  |
| Grade 2 | 0 | 0 | 0.00 | 1 | 1 | 0.67 | 0 | 0 | 0.00 | 1 | 1 | 0.22 | 0.4983 | 1.0000 | 0.4967 |  |
| Grade 3 | 0 | 0 | 0.00 | 0 | 0 | 0.00 | 0 | 0 | 0.00 | 0 | 0 | 0.00 | 1.0000 | 1.0000 | 1.0000 |  |
| **Respiratory, thoracic and mediastinal disorders** | 6 | 6 | 4.00 | 5 | 4 | 2.68 | 3 | 3 | 1.99 | 14 | 13 | 2.89 | 0.7497 | 0.3355 | 0.7219 |  |
| Grade 1 | 0 | 0 | 0.00 | 2 | 2 | 1.34 | 1 | 1 | 0.66 | 3 | 3 | 0.67 | 0.2475 | 1.0000 | 0.6212 |  |
| Grade 2 | 6 | 6 | 4.00 | 1 | 1 | 0.67 | 2 | 2 | 1.32 | 9 | 9 | 2.00 | 0.1206 | 0.1731 | 1.0000 |  |
| Grade 3 | 0 | 0 | 0.00 | 2 | 1 | 0.67 | 0 | 0 | 0.00 | 2 | 1 | 0.22 | 0.4983 | 1.0000 | 0.4967 |  |
| Cough | 2 | 2 | 1.33 | 0 | 0 | 0.00 | 1 | 1 | 0.66 | 3 | 3 | 0.67 | 0.4983 | 0.6225 | 1.0000 |  |
| Grade 1 | 0 | 0 | 0.00 | 0 | 0 | 0.00 | 0 | 0 | 0.00 | 0 | 0 | 0.00 | 1.0000 | 1.0000 | 1.0000 |  |
| Grade 2 | 2 | 2 | 1.33 | 0 | 0 | 0.00 | 1 | 1 | 0.66 | 3 | 3 | 0.67 | 1.0000 | 0.6225 | 1.0000 |  |
| Grade 3 | 0 | 0 | 0.00 | 0 | 0 | 0.00 | 0 | 0 | 0.00 | 0 | 0 | 0.00 | 1.0000 | 1.0000 | 1.0000 |  |
| Rhinorrhoea | 1 | 1 | 0.67 | 1 | 1 | 0.67 | 1 | 1 | 0.66 | 3 | 3 | 0.67 | 1.0000 | 1.0000 | 1.0000 |  |
| Grade 1 | 0 | 0 | 0.00 | 0 | 0 | 0.00 | 1 | 1 | 0.66 | 1 | 1 | 0.22 | 1.0000 | 1.0000 | 1.0000 |  |
| Grade 2 | 1 | 1 | 0.67 | 1 | 1 | 0.67 | 0 | 0 | 0.00 | 2 | 2 | 0.44 | 1.0000 | 0.4983 | 0.4967 |  |
| Grade 3 | 0 | 0 | 0.00 | 0 | 0 | 0.00 | 0 | 0 | 0.00 | 0 | 0 | 0.00 | 1.0000 | 1.0000 | 1.0000 |  |
| Throat irritation | 1 | 1 | 0.67 | 0 | 0 | 0.00 | 1 | 1 | 0.66 | 2 | 2 | 0.44 | 1.0000 | 1.0000 | 1.0000 |  |
| Grade 1 | 0 | 0 | 0.00 | 0 | 0 | 0.00 | 0 | 0 | 0.00 | 0 | 0 | 0.00 | 1.0000 | 1.0000 | 1.0000 |  |
| Grade 2 | 1 | 1 | 0.67 | 0 | 0 | 0.00 | 1 | 1 | 0.66 | 2 | 2 | 0.44 | 1.0000 | 1.0000 | 1.0000 |  |
| Grade 3 | 0 | 0 | 0.00 | 0 | 0 | 0.00 | 0 | 0 | 0.00 | 0 | 0 | 0.00 | 1.0000 | 1.0000 | 1.0000 |  |
| Productive cough | 0 | 0 | 0.00 | 1 | 1 | 0.67 | 0 | 0 | 0.00 | 1 | 1 | 0.22 | 0.4983 | 1.0000 | 0.4967 |  |
| Grade 1 | 0 | 0 | 0.00 | 1 | 1 | 0.67 | 0 | 0 | 0.00 | 1 | 1 | 0.22 | 0.4983 | 1.0000 | 0.4967 |  |
| Grade 2 | 0 | 0 | 0.00 | 0 | 0 | 0.00 | 0 | 0 | 0.00 | 0 | 0 | 0.00 | 1.0000 | 1.0000 | 1.0000 |  |
| Grade 3 | 0 | 0 | 0.00 | 0 | 0 | 0.00 | 0 | 0 | 0.00 | 0 | 0 | 0.00 | 1.0000 | 1.0000 | 1.0000 |  |
| Laryngeal mass | 0 | 0 | 0.00 | 1 | 1 | 0.67 | 0 | 0 | 0.00 | 1 | 1 | 0.22 | 0.4983 | 1.0000 | 0.4967 |  |
| Grade 1 | 0 | 0 | 0.00 | 0 | 0 | 0.00 | 0 | 0 | 0.00 | 0 | 0 | 0.00 | 1.0000 | 1.0000 | 1.0000 |  |
| Grade 2 | 0 | 0 | 0.00 | 0 | 0 | 0.00 | 0 | 0 | 0.00 | 0 | 0 | 0.00 | 1.0000 | 1.0000 | 1.0000 |  |
| Grade 3 | 0 | 0 | 0.00 | 1 | 1 | 0.67 | 0 | 0 | 0.00 | 1 | 1 | 0.22 | 0.4983 | 1.0000 | 0.4967 |  |
| Chronic rhinosinusitis with nasal polyps | 0 | 0 | 0.00 | 1 | 1 | 0.67 | 0 | 0 | 0.00 | 1 | 1 | 0.22 | 0.4983 | 1.0000 | 0.4967 |  |
| Grade 1 | 0 | 0 | 0.00 | 0 | 0 | 0.00 | 0 | 0 | 0.00 | 0 | 0 | 0.00 | 1.0000 | 1.0000 | 1.0000 |  |
| Grade 2 | 0 | 0 | 0.00 | 0 | 0 | 0.00 | 0 | 0 | 0.00 | 0 | 0 | 0.00 | 1.0000 | 1.0000 | 1.0000 |  |
| Grade 3 | 0 | 0 | 0.00 | 1 | 1 | 0.67 | 0 | 0 | 0.00 | 1 | 1 | 0.22 | 0.4983 | 1.0000 | 0.4967 |  |
| Lung mass | 1 | 1 | 0.67 | 0 | 0 | 0.00 | 0 | 0 | 0.00 | 1 | 1 | 0.22 | 1.0000 | 0.4983 | 1.0000 |  |
| Grade 1 | 0 | 0 | 0.00 | 0 | 0 | 0.00 | 0 | 0 | 0.00 | 0 | 0 | 0.00 | 1.0000 | 1.0000 | 1.0000 |  |
| Grade 2 | 1 | 1 | 0.67 | 0 | 0 | 0.00 | 0 | 0 | 0.00 | 1 | 1 | 0.22 | 1.0000 | 0.4983 | 1.0000 |  |
| Grade 3 | 0 | 0 | 0.00 | 0 | 0 | 0.00 | 0 | 0 | 0.00 | 0 | 0 | 0.00 | 1.0000 | 1.0000 | 1.0000 |  |
| Anaphylactic rhinitis | 1 | 1 | 0.67 | 0 | 0 | 0.00 | 0 | 0 | 0.00 | 1 | 1 | 0.22 | 1.0000 | 0.4983 | 1.0000 |  |
| Grade 1 | 0 | 0 | 0.00 | 0 | 0 | 0.00 | 0 | 0 | 0.00 | 0 | 0 | 0.00 | 1.0000 | 1.0000 | 1.0000 |  |
| Grade 2 | 1 | 1 | 0.67 | 0 | 0 | 0.00 | 0 | 0 | 0.00 | 1 | 1 | 0.22 | 1.0000 | 0.4983 | 1.0000 |  |
| Grade 3 | 0 | 0 | 0.00 | 0 | 0 | 0.00 | 0 | 0 | 0.00 | 0 | 0 | 0.00 | 1.0000 | 1.0000 | 1.0000 |  |
| Nasal congestion | 0 | 0 | 0.00 | 1 | 1 | 0.67 | 0 | 0 | 0.00 | 1 | 1 | 0.22 | 0.4983 | 1.0000 | 0.4967 |  |
| Grade 1 | 0 | 0 | 0.00 | 1 | 1 | 0.67 | 0 | 0 | 0.00 | 1 | 1 | 0.22 | 0.4983 | 1.0000 | 0.4967 |  |
| Grade 2 | 0 | 0 | 0.00 | 0 | 0 | 0.00 | 0 | 0 | 0.00 | 0 | 0 | 0.00 | 1.0000 | 1.0000 | 1.0000 |  |
| Grade 3 | 0 | 0 | 0.00 | 0 | 0 | 0.00 | 0 | 0 | 0.00 | 0 | 0 | 0.00 | 1.0000 | 1.0000 | 1.0000 |  |
| **Skin and subcutaneous tissue disorders** | 7 | 6 | 4.00 | 7 | 4 | 2.68 | 2 | 2 | 1.32 | 16 | 12 | 2.67 | 0.7497 | 0.1731 | 0.4460 |  |
| Grade 1 | 4 | 4 | 2.67 | 5 | 3 | 2.01 | 0 | 0 | 0.00 | 9 | 7 | 1.56 | 1.0000 | 0.0604 | 0.1213 |  |
| Grade 2 | 3 | 3 | 2.00 | 1 | 1 | 0.67 | 2 | 2 | 1.32 | 6 | 6 | 1.33 | 0.6225 | 0.6844 | 1.0000 |  |
| Grade 3 | 0 | 0 | 0.00 | 1 | 1 | 0.67 | 0 | 0 | 0.00 | 1 | 1 | 0.22 | 0.4983 | 1.0000 | 0.4967 |  |
| Rash | 3 | 3 | 2.00 | 1 | 1 | 0.67 | 1 | 1 | 0.66 | 5 | 5 | 1.11 | 0.6225 | 0.3708 | 1.0000 |  |
| Grade 1 | 2 | 2 | 1.33 | 1 | 1 | 0.67 | 0 | 0 | 0.00 | 3 | 3 | 0.67 | 1.0000 | 0.2475 | 0.4967 |  |
| Grade 2 | 1 | 1 | 0.67 | 0 | 0 | 0.00 | 1 | 1 | 0.66 | 2 | 2 | 0.44 | 1.0000 | 1.0000 | 1.0000 |  |
| Grade 3 | 0 | 0 | 0.00 | 0 | 0 | 0.00 | 0 | 0 | 0.00 | 0 | 0 | 0.00 | 1.0000 | 1.0000 | 1.0000 |  |
| Itch | 1 | 1 | 0.67 | 2 | 1 | 0.67 | 0 | 0 | 0.00 | 3 | 2 | 0.44 | 1.0000 | 0.4983 | 0.4967 |  |
| Grade 1 | 1 | 1 | 0.67 | 2 | 1 | 0.67 | 0 | 0 | 0.00 | 3 | 2 | 0.44 | 1.0000 | 1.0000 | 0.4967 |  |
| Grade 2 | 0 | 0 | 0.00 | 0 | 0 | 0.00 | 0 | 0 | 0.00 | 0 | 0 | 0.00 | 1.0000 | 1.0000 | 1.0000 |  |
| Grade 3 | 0 | 0 | 0.00 | 0 | 0 | 0.00 | 0 | 0 | 0.00 | 0 | 0 | 0.00 | 1.0000 | 1.0000 | 1.0000 |  |
| Allergic dermatitis | 1 | 1 | 0.67 | 0 | 0 | 0.00 | 1 | 1 | 0.66 | 2 | 2 | 0.44 | 1.0000 | 1.0000 | 1.0000 |  |
| Grade 1 | 0 | 0 | 0.00 | 0 | 0 | 0.00 | 0 | 0 | 0.00 | 0 | 0 | 0.00 | 1.0000 | 1.0000 | 1.0000 |  |
| Grade 2 | 1 | 1 | 0.67 | 0 | 0 | 0.00 | 1 | 1 | 0.66 | 2 | 2 | 0.44 | 1.0000 | 1.0000 | 1.0000 |  |
| Grade 3 | 0 | 0 | 0.00 | 0 | 0 | 0.00 | 0 | 0 | 0.00 | 0 | 0 | 0.00 | 1.0000 | 1.0000 | 1.0000 |  |
| Eczema | 0 | 0 | 0.00 | 1 | 1 | 0.67 | 0 | 0 | 0.00 | 1 | 1 | 0.22 | 0.4983 | 1.0000 | 0.4967 |  |
| Grade 1 | 0 | 0 | 0.00 | 0 | 0 | 0.00 | 0 | 0 | 0.00 | 0 | 0 | 0.00 | 1.0000 | 1.0000 | 1.0000 |  |
| Grade 2 | 0 | 0 | 0.00 | 1 | 1 | 0.67 | 0 | 0 | 0.00 | 1 | 1 | 0.22 | 0.4983 | 1.0000 | 0.4967 |  |
| Grade 3 | 0 | 0 | 0.00 | 0 | 0 | 0.00 | 0 | 0 | 0.00 | 0 | 0 | 0.00 | 1.0000 | 1.0000 | 1.0000 |  |
| Pruritic rash | 1 | 1 | 0.67 | 0 | 0 | 0.00 | 0 | 0 | 0.00 | 1 | 1 | 0.22 | 1.0000 | 0.4983 | 1.0000 |  |
| Grade 1 | 1 | 1 | 0.67 | 0 | 0 | 0.00 | 0 | 0 | 0.00 | 1 | 1 | 0.22 | 1.0000 | 0.4983 | 1.0000 |  |
| Grade 2 | 0 | 0 | 0.00 | 0 | 0 | 0.00 | 0 | 0 | 0.00 | 0 | 0 | 0.00 | 1.0000 | 1.0000 | 1.0000 |  |
| Grade 3 | 0 | 0 | 0.00 | 0 | 0 | 0.00 | 0 | 0 | 0.00 | 0 | 0 | 0.00 | 1.0000 | 1.0000 | 1.0000 |  |
| Skin burning sensation | 0 | 0 | 0.00 | 2 | 1 | 0.67 | 0 | 0 | 0.00 | 2 | 1 | 0.22 | 0.4983 | 1.0000 | 0.4967 |  |
| Grade 1 | 0 | 0 | 0.00 | 2 | 1 | 0.67 | 0 | 0 | 0.00 | 2 | 1 | 0.22 | 0.4983 | 1.0000 | 0.4967 |  |
| Grade 2 | 0 | 0 | 0.00 | 0 | 0 | 0.00 | 0 | 0 | 0.00 | 0 | 0 | 0.00 | 1.0000 | 1.0000 | 1.0000 |  |
| Grade 3 | 0 | 0 | 0.00 | 0 | 0 | 0.00 | 0 | 0 | 0.00 | 0 | 0 | 0.00 | 1.0000 | 1.0000 | 1.0000 |  |
| Urticaria | 1 | 1 | 0.67 | 0 | 0 | 0.00 | 0 | 0 | 0.00 | 1 | 1 | 0.22 | 1.0000 | 1.0000 | 1.0000 |  |
| Grade 1 | 0 | 0 | 0.00 | 0 | 0 | 0.00 | 0 | 0 | 0.00 | 0 | 0 | 0.00 | 1.0000 | 1.0000 | 1.0000 |  |
| Grade 2 | 1 | 1 | 0.67 | 0 | 0 | 0.00 | 0 | 0 | 0.00 | 1 | 1 | 0.22 | 1.0000 | 1.0000 | 1.0000 |  |
| Grade 3 | 0 | 0 | 0.00 | 0 | 0 | 0.00 | 0 | 0 | 0.00 | 0 | 0 | 0.00 | 1.0000 | 1.0000 | 1.0000 |  |
| Henoch-Schönlein purpura | 0 | 0 | 0.00 | 1 | 1 | 0.67 | 0 | 0 | 0.00 | 1 | 1 | 0.22 | 0.4983 | 1.0000 | 0.4967 |  |
| Grade 1 | 0 | 0 | 0.00 | 0 | 0 | 0.00 | 0 | 0 | 0.00 | 0 | 0 | 0.00 | 1.0000 | 1.0000 | 1.0000 |  |
| Grade 2 | 0 | 0 | 0.00 | 0 | 0 | 0.00 | 0 | 0 | 0.00 | 0 | 0 | 0.00 | 1.0000 | 1.0000 | 1.0000 |  |
| Grade 3 | 0 | 0 | 0.00 | 1 | 1 | 0.67 | 0 | 0 | 0.00 | 1 | 1 | 0.22 | 0.4983 | 1.0000 | 0.4967 |  |
| **Immune system disorders** | 2 | 2 | 1.33 | 1 | 1 | 0.67 | 3 | 3 | 1.99 | 6 | 6 | 1.33 | 1.0000 | 1.0000 | 0.6225 |  |
| Grade 1 | 1 | 1 | 0.67 | 1 | 1 | 0.67 | 2 | 2 | 1.32 | 4 | 4 | 0.89 | 1.0000 | 1.0000 | 1.0000 |  |
| Grade 2 | 1 | 1 | 0.67 | 0 | 0 | 0.00 | 1 | 1 | 0.66 | 2 | 2 | 0.44 | 1.0000 | 1.0000 | 1.0000 |  |
| Grade 3 | 0 | 0 | 0.00 | 0 | 0 | 0.00 | 0 | 0 | 0.00 | 0 | 0 | 0.00 | 1.0000 | 1.0000 | 1.0000 |  |
| Hypersensitivity | 2 | 2 | 1.33 | 1 | 1 | 0.67 | 3 | 3 | 1.99 | 6 | 6 | 1.33 | 1.0000 | 1.0000 | 0.6225 |  |
| Grade 1 | 1 | 1 | 0.67 | 1 | 1 | 0.67 | 2 | 2 | 1.32 | 4 | 4 | 0.89 | 1.0000 | 1.0000 | 1.0000 |  |
| Grade 2 | 1 | 1 | 0.67 | 0 | 0 | 0.00 | 1 | 1 | 0.66 | 2 | 2 | 0.44 | 1.0000 | 1.0000 | 1.0000 |  |
| Grade 3 | 0 | 0 | 0.00 | 0 | 0 | 0.00 | 0 | 0 | 0.00 | 0 | 0 | 0.00 | 1.0000 | 1.0000 | 1.0000 |  |
| **Metabolism and nutrition disorders** | 0 | 0 | 0.00 | 4 | 2 | 1.34 | 5 | 3 | 1.99 | 9 | 5 | 1.11 | 0.2475 | 0.2475 | 1.0000 |  |
| Grade 1 | 0 | 0 | 0.00 | 2 | 1 | 0.67 | 1 | 1 | 0.66 | 3 | 2 | 0.44 | 0.4983 | 1.0000 | 1.0000 |  |
| Grade 2 | 0 | 0 | 0.00 | 1 | 1 | 0.67 | 4 | 3 | 1.99 | 5 | 4 | 0.89 | 0.4983 | 0.2475 | 0.6225 |  |
| Grade 3 | 0 | 0 | 0.00 | 1 | 1 | 0.67 | 0 | 0 | 0.00 | 1 | 1 | 0.22 | 0.4983 | 1.0000 | 0.4967 |  |
| Hyperlipidaemia | 0 | 0 | 0.00 | 2 | 2 | 1.34 | 0 | 0 | 0.00 | 2 | 2 | 0.44 | 0.2475 | 1.0000 | 0.2458 |  |
| Grade 1 | 0 | 0 | 0.00 | 1 | 1 | 0.67 | 0 | 0 | 0.00 | 1 | 1 | 0.22 | 0.4983 | 1.0000 | 0.4967 |  |
| Grade 2 | 0 | 0 | 0.00 | 1 | 1 | 0.67 | 0 | 0 | 0.00 | 1 | 1 | 0.22 | 0.4983 | 1.0000 | 0.4967 |  |
| Grade 3 | 0 | 0 | 0.00 | 0 | 0 | 0.00 | 0 | 0 | 0.00 | 0 | 0 | 0.00 | 1.0000 | 1.0000 | 1.0000 |  |
| Type 2 diabetes mellitus | 0 | 0 | 0.00 | 1 | 1 | 0.67 | 0 | 0 | 0.00 | 1 | 1 | 0.22 | 0.4983 | 1.0000 | 0.4967 |  |
| Grade 1 | 0 | 0 | 0.00 | 0 | 0 | 0.00 | 0 | 0 | 0.00 | 0 | 0 | 0.00 | 1.0000 | 1.0000 | 1.0000 |  |
| Grade 2 | 0 | 0 | 0.00 | 0 | 0 | 0.00 | 0 | 0 | 0.00 | 0 | 0 | 0.00 | 1.0000 | 1.0000 | 1.0000 |  |
| Grade 3 | 0 | 0 | 0.00 | 1 | 1 | 0.67 | 0 | 0 | 0.00 | 1 | 1 | 0.22 | 0.4983 | 1.0000 | 0.4967 |  |
| Hypoproteinaemia | 0 | 0 | 0.00 | 0 | 0 | 0.00 | 1 | 1 | 0.66 | 1 | 1 | 0.22 | 1.0000 | 1.0000 | 1.0000 |  |
| Grade 1 | 0 | 0 | 0.00 | 0 | 0 | 0.00 | 0 | 0 | 0.00 | 0 | 0 | 0.00 | 1.0000 | 1.0000 | 1.0000 |  |
| Grade 2 | 0 | 0 | 0.00 | 0 | 0 | 0.00 | 1 | 1 | 0.66 | 1 | 1 | 0.22 | 1.0000 | 1.0000 | 1.0000 |  |
| Grade 3 | 0 | 0 | 0.00 | 0 | 0 | 0.00 | 0 | 0 | 0.00 | 0 | 0 | 0.00 | 1.0000 | 1.0000 | 1.0000 |  |
| Hypokalaemia | 0 | 0 | 0.00 | 1 | 1 | 0.67 | 0 | 0 | 0.00 | 1 | 1 | 0.22 | 0.4983 | 1.0000 | 0.4967 |  |
| Grade 1 | 0 | 0 | 0.00 | 1 | 1 | 0.67 | 0 | 0 | 0.00 | 1 | 1 | 0.22 | 0.4983 | 1.0000 | 0.4967 |  |
| Grade 2 | 0 | 0 | 0.00 | 0 | 0 | 0.00 | 0 | 0 | 0.00 | 0 | 0 | 0.00 | 1.0000 | 1.0000 | 1.0000 |  |
| Grade 3 | 0 | 0 | 0.00 | 0 | 0 | 0.00 | 0 | 0 | 0.00 | 0 | 0 | 0.00 | 1.0000 | 1.0000 | 1.0000 |  |
| Gout | 0 | 0 | 0.00 | 0 | 0 | 0.00 | 1 | 1 | 0.66 | 1 | 1 | 0.22 | 1.0000 | 1.0000 | 1.0000 |  |
| Grade 1 | 0 | 0 | 0.00 | 0 | 0 | 0.00 | 0 | 0 | 0.00 | 0 | 0 | 0.00 | 1.0000 | 1.0000 | 1.0000 |  |
| Grade 2 | 0 | 0 | 0.00 | 0 | 0 | 0.00 | 1 | 1 | 0.66 | 1 | 1 | 0.22 | 1.0000 | 1.0000 | 1.0000 |  |
| Grade 3 | 0 | 0 | 0.00 | 0 | 0 | 0.00 | 0 | 0 | 0.00 | 0 | 0 | 0.00 | 1.0000 | 1.0000 | 1.0000 |  |
| Diabetes mellitus | 0 | 0 | 0.00 | 0 | 0 | 0.00 | 1 | 1 | 0.66 | 1 | 1 | 0.22 | 1.0000 | 1.0000 | 1.0000 |  |
| Grade 1 | 0 | 0 | 0.00 | 0 | 0 | 0.00 | 0 | 0 | 0.00 | 0 | 0 | 0.00 | 1.0000 | 1.0000 | 1.0000 |  |
| Grade 2 | 0 | 0 | 0.00 | 0 | 0 | 0.00 | 1 | 1 | 0.66 | 1 | 1 | 0.22 | 1.0000 | 1.0000 | 1.0000 |  |
| Grade 3 | 0 | 0 | 0.00 | 0 | 0 | 0.00 | 0 | 0 | 0.00 | 0 | 0 | 0.00 | 1.0000 | 1.0000 | 1.0000 |  |
| Impaired glucose tolerance | 0 | 0 | 0.00 | 0 | 0 | 0.00 | 1 | 1 | 0.66 | 1 | 1 | 0.22 | 1.0000 | 1.0000 | 1.0000 |  |
| Grade 1 | 0 | 0 | 0.00 | 0 | 0 | 0.00 | 1 | 1 | 0.66 | 1 | 1 | 0.22 | 1.0000 | 1.0000 | 1.0000 |  |
| Grade 2 | 0 | 0 | 0.00 | 0 | 0 | 0.00 | 0 | 0 | 0.00 | 0 | 0 | 0.00 | 1.0000 | 1.0000 | 1.0000 |  |
| Grade 3 | 0 | 0 | 0.00 | 0 | 0 | 0.00 | 0 | 0 | 0.00 | 0 | 0 | 0.00 | 1.0000 | 1.0000 | 1.0000 |  |
| Hyperkalaemia | 0 | 0 | 0.00 | 0 | 0 | 0.00 | 1 | 1 | 0.66 | 1 | 1 | 0.22 | 1.0000 | 1.0000 | 1.0000 |  |
| Grade 1 | 0 | 0 | 0.00 | 0 | 0 | 0.00 | 0 | 0 | 0.00 | 0 | 0 | 0.00 | 1.0000 | 1.0000 | 1.0000 |  |
| Grade 2 | 0 | 0 | 0.00 | 0 | 0 | 0.00 | 1 | 1 | 0.66 | 1 | 1 | 0.22 | 1.0000 | 1.0000 | 1.0000 |  |
| Grade 3 | 0 | 0 | 0.00 | 0 | 0 | 0.00 | 0 | 0 | 0.00 | 0 | 0 | 0.00 | 1.0000 | 1.0000 | 1.0000 |  |
| **Injury, poisoning and procedural complications** | 0 | 0 | 0.00 | 2 | 2 | 1.34 | 2 | 2 | 1.32 | 4 | 4 | 0.89 | 0.2475 | 0.4983 | 1.0000 |  |
| Grade 1 | 0 | 0 | 0.00 | 0 | 0 | 0.00 | 1 | 1 | 0.66 | 1 | 1 | 0.22 | 1.0000 | 1.0000 | 1.0000 |  |
| Grade 2 | 0 | 0 | 0.00 | 1 | 1 | 0.67 | 1 | 1 | 0.66 | 2 | 2 | 0.44 | 0.4983 | 1.0000 | 1.0000 |  |
| Grade 3 | 0 | 0 | 0.00 | 1 | 1 | 0.67 | 0 | 0 | 0.00 | 1 | 1 | 0.22 | 0.4983 | 1.0000 | 0.4967 |  |
| Ligament sprain | 0 | 0 | 0.00 | 1 | 1 | 0.67 | 1 | 1 | 0.66 | 2 | 2 | 0.44 | 0.4983 | 1.0000 | 1.0000 |  |
| Grade 1 | 0 | 0 | 0.00 | 0 | 0 | 0.00 | 1 | 1 | 0.66 | 1 | 1 | 0.22 | 1.0000 | 1.0000 | 1.0000 |  |
| Grade 2 | 0 | 0 | 0.00 | 1 | 1 | 0.67 | 0 | 0 | 0.00 | 1 | 1 | 0.22 | 0.4983 | 1.0000 | 0.4967 |  |
| Grade 3 | 0 | 0 | 0.00 | 0 | 0 | 0.00 | 0 | 0 | 0.00 | 0 | 0 | 0.00 | 1.0000 | 1.0000 | 1.0000 |  |
| Animal bite | 0 | 0 | 0.00 | 0 | 0 | 0.00 | 1 | 1 | 0.66 | 1 | 1 | 0.22 | 1.0000 | 1.0000 | 1.0000 |  |
| Grade 1 | 0 | 0 | 0.00 | 0 | 0 | 0.00 | 0 | 0 | 0.00 | 0 | 0 | 0.00 | 1.0000 | 1.0000 | 1.0000 |  |
| Grade 2 | 0 | 0 | 0.00 | 0 | 0 | 0.00 | 1 | 1 | 0.66 | 1 | 1 | 0.22 | 1.0000 | 1.0000 | 1.0000 |  |
| Grade 3 | 0 | 0 | 0.00 | 0 | 0 | 0.00 | 0 | 0 | 0.00 | 0 | 0 | 0.00 | 1.0000 | 1.0000 | 1.0000 |  |
| Cervical nerve root injury | 0 | 0 | 0.00 | 1 | 1 | 0.67 | 0 | 0 | 0.00 | 1 | 1 | 0.22 | 0.4983 | 1.0000 | 0.4967 |  |
| Grade 1 | 0 | 0 | 0.00 | 0 | 0 | 0.00 | 0 | 0 | 0.00 | 0 | 0 | 0.00 | 1.0000 | 1.0000 | 1.0000 |  |
| Grade 2 | 0 | 0 | 0.00 | 0 | 0 | 0.00 | 0 | 0 | 0.00 | 0 | 0 | 0.00 | 1.0000 | 1.0000 | 1.0000 |  |
| Grade 3 | 0 | 0 | 0.00 | 1 | 1 | 0.67 | 0 | 0 | 0.00 | 1 | 1 | 0.22 | 0.4983 | 1.0000 | 0.4967 |  |
| **Eye disorders** | 2 | 1 | 0.67 | 1 | 1 | 0.67 | 3 | 2 | 1.32 | 6 | 4 | 0.89 | 1.0000 | 1.0000 | 1.0000 |  |
| Grade 1 | 0 | 0 | 0.00 | 0 | 0 | 0.00 | 0 | 0 | 0.00 | 0 | 0 | 0.00 | 1.0000 | 1.0000 | 1.0000 |  |
| Grade 2 | 2 | 1 | 0.67 | 1 | 1 | 0.67 | 2 | 2 | 1.32 | 5 | 4 | 0.89 | 1.0000 | 1.0000 | 1.0000 |  |
| Grade 3 | 0 | 0 | 0.00 | 0 | 0 | 0.00 | 1 | 1 | 0.66 | 1 | 1 | 0.22 | 1.0000 | 1.0000 | 1.0000 |  |
| Vitreous floaters | 0 | 0 | 0.00 | 0 | 0 | 0.00 | 1 | 1 | 0.66 | 1 | 1 | 0.22 | 1.0000 | 1.0000 | 1.0000 |  |
| Grade 1 | 0 | 0 | 0.00 | 0 | 0 | 0.00 | 0 | 0 | 0.00 | 0 | 0 | 0.00 | 1.0000 | 1.0000 | 1.0000 |  |
| Grade 2 | 0 | 0 | 0.00 | 0 | 0 | 0.00 | 1 | 1 | 0.66 | 1 | 1 | 0.22 | 1.0000 | 1.0000 | 1.0000 |  |
| Grade 3 | 0 | 0 | 0.00 | 0 | 0 | 0.00 | 0 | 0 | 0.00 | 0 | 0 | 0.00 | 1.0000 | 1.0000 | 1.0000 |  |
| Cataract | 0 | 0 | 0.00 | 0 | 0 | 0.00 | 1 | 1 | 0.66 | 1 | 1 | 0.22 | 1.0000 | 1.0000 | 1.0000 |  |
| Grade 1 | 0 | 0 | 0.00 | 0 | 0 | 0.00 | 0 | 0 | 0.00 | 0 | 0 | 0.00 | 1.0000 | 1.0000 | 1.0000 |  |
| Grade 2 | 0 | 0 | 0.00 | 0 | 0 | 0.00 | 1 | 1 | 0.66 | 1 | 1 | 0.22 | 1.0000 | 1.0000 | 1.0000 |  |
| Grade 3 | 0 | 0 | 0.00 | 0 | 0 | 0.00 | 0 | 0 | 0.00 | 0 | 0 | 0.00 | 1.0000 | 1.0000 | 1.0000 |  |
| Conjunctival hyperaemia | 0 | 0 | 0.00 | 1 | 1 | 0.67 | 0 | 0 | 0.00 | 1 | 1 | 0.22 | 0.4983 | 1.0000 | 0.4967 |  |
| Grade 1 | 0 | 0 | 0.00 | 0 | 0 | 0.00 | 0 | 0 | 0.00 | 0 | 0 | 0.00 | 1.0000 | 1.0000 | 1.0000 |  |
| Grade 2 | 0 | 0 | 0.00 | 1 | 1 | 0.67 | 0 | 0 | 0.00 | 1 | 1 | 0.22 | 0.4983 | 1.0000 | 0.4967 |  |
| Grade 3 | 0 | 0 | 0.00 | 0 | 0 | 0.00 | 0 | 0 | 0.00 | 0 | 0 | 0.00 | 1.0000 | 1.0000 | 1.0000 |  |
| Eye pruritus | 1 | 1 | 0.67 | 0 | 0 | 0.00 | 0 | 0 | 0.00 | 1 | 1 | 0.22 | 1.0000 | 0.4983 | 1.0000 |  |
| Grade 1 | 0 | 0 | 0.00 | 0 | 0 | 0.00 | 0 | 0 | 0.00 | 0 | 0 | 0.00 | 1.0000 | 1.0000 | 1.0000 |  |
| Grade 2 | 1 | 1 | 0.67 | 0 | 0 | 0.00 | 0 | 0 | 0.00 | 1 | 1 | 0.22 | 1.0000 | 0.4983 | 1.0000 |  |
| Grade 3 | 0 | 0 | 0.00 | 0 | 0 | 0.00 | 0 | 0 | 0.00 | 0 | 0 | 0.00 | 1.0000 | 1.0000 | 1.0000 |  |
| Eye swelling | 1 | 1 | 0.67 | 0 | 0 | 0.00 | 0 | 0 | 0.00 | 1 | 1 | 0.22 | 1.0000 | 0.4983 | 1.0000 |  |
| Grade 1 | 0 | 0 | 0.00 | 0 | 0 | 0.00 | 0 | 0 | 0.00 | 0 | 0 | 0.00 | 1.0000 | 1.0000 | 1.0000 |  |
| Grade 2 | 1 | 1 | 0.67 | 0 | 0 | 0.00 | 0 | 0 | 0.00 | 1 | 1 | 0.22 | 1.0000 | 0.4983 | 1.0000 |  |
| Grade 3 | 0 | 0 | 0.00 | 0 | 0 | 0.00 | 0 | 0 | 0.00 | 0 | 0 | 0.00 | 1.0000 | 1.0000 | 1.0000 |  |
| Macular hole | 0 | 0 | 0.00 | 0 | 0 | 0.00 | 1 | 1 | 0.66 | 1 | 1 | 0.22 | 1.0000 | 1.0000 | 1.0000 |  |
| Grade 1 | 0 | 0 | 0.00 | 0 | 0 | 0.00 | 0 | 0 | 0.00 | 0 | 0 | 0.00 | 1.0000 | 1.0000 | 1.0000 |  |
| Grade 2 | 0 | 0 | 0.00 | 0 | 0 | 0.00 | 0 | 0 | 0.00 | 0 | 0 | 0.00 | 1.0000 | 1.0000 | 1.0000 |  |
| Grade 3 | 0 | 0 | 0.00 | 0 | 0 | 0.00 | 1 | 1 | 0.66 | 1 | 1 | 0.22 | 1.0000 | 1.0000 | 1.0000 |  |
| **Psychiatric disorders** | 2 | 2 | 1.33 | 1 | 1 | 0.67 | 1 | 1 | 0.66 | 4 | 4 | 0.89 | 1.0000 | 0.6225 | 1.0000 |  |
| Grade 1 | 1 | 1 | 0.67 | 0 | 0 | 0.00 | 0 | 0 | 0.00 | 1 | 1 | 0.22 | 1.0000 | 0.4983 | 1.0000 |  |
| Grade 2 | 1 | 1 | 0.67 | 1 | 1 | 0.67 | 1 | 1 | 0.66 | 3 | 3 | 0.67 | 1.0000 | 1.0000 | 1.0000 |  |
| Grade 3 | 0 | 0 | 0.00 | 0 | 0 | 0.00 | 0 | 0 | 0.00 | 0 | 0 | 0.00 | 1.0000 | 1.0000 | 1.0000 |  |
| Insomnia | 1 | 1 | 0.67 | 0 | 0 | 0.00 | 1 | 1 | 0.66 | 2 | 2 | 0.44 | 1.0000 | 1.0000 | 1.0000 |  |
| Grade 1 | 0 | 0 | 0.00 | 0 | 0 | 0.00 | 0 | 0 | 0.00 | 0 | 0 | 0.00 | 1.0000 | 1.0000 | 1.0000 |  |
| Grade 2 | 1 | 1 | 0.67 | 0 | 0 | 0.00 | 1 | 1 | 0.66 | 2 | 2 | 0.44 | 1.0000 | 1.0000 | 1.0000 |  |
| Grade 3 | 0 | 0 | 0.00 | 0 | 0 | 0.00 | 0 | 0 | 0.00 | 0 | 0 | 0.00 | 1.0000 | 1.0000 | 1.0000 |  |
| Poor sleep quality | 0 | 0 | 0.00 | 1 | 1 | 0.67 | 0 | 0 | 0.00 | 1 | 1 | 0.22 | 0.4983 | 1.0000 | 0.4967 |  |
| Grade 1 | 0 | 0 | 0.00 | 0 | 0 | 0.00 | 0 | 0 | 0.00 | 0 | 0 | 0.00 | 1.0000 | 1.0000 | 1.0000 |  |
| Grade 2 | 0 | 0 | 0.00 | 1 | 1 | 0.67 | 0 | 0 | 0.00 | 1 | 1 | 0.22 | 0.4983 | 1.0000 | 0.4967 |  |
| Grade 3 | 0 | 0 | 0.00 | 0 | 0 | 0.00 | 0 | 0 | 0.00 | 0 | 0 | 0.00 | 1.0000 | 1.0000 | 1.0000 |  |
| Agitation | 1 | 1 | 0.67 | 0 | 0 | 0.00 | 0 | 0 | 0.00 | 1 | 1 | 0.22 | 1.0000 | 0.4983 | 1.0000 |  |
| Grade 1 | 1 | 1 | 0.67 | 0 | 0 | 0.00 | 0 | 0 | 0.00 | 1 | 1 | 0.22 | 1.0000 | 0.4983 | 1.0000 |  |
| Grade 2 | 0 | 0 | 0.00 | 0 | 0 | 0.00 | 0 | 0 | 0.00 | 0 | 0 | 0.00 | 1.0000 | 1.0000 | 1.0000 |  |
| Grade 3 | 0 | 0 | 0.00 | 0 | 0 | 0.00 | 0 | 0 | 0.00 | 0 | 0 | 0.00 | 1.0000 | 1.0000 | 1.0000 |  |
| **Renal and urinary disorders** | 1 | 1 | 0.67 | 0 | 0 | 0.00 | 1 | 1 | 0.66 | 2 | 2 | 0.44 | 1.0000 | 1.0000 | 1.0000 |  |
| Grade 1 | 0 | 0 | 0.00 | 0 | 0 | 0.00 | 0 | 0 | 0.00 | 0 | 0 | 0.00 | 1.0000 | 1.0000 | 1.0000 |  |
| Grade 2 | 1 | 1 | 0.67 | 0 | 0 | 0.00 | 0 | 0 | 0.00 | 1 | 1 | 0.22 | 1.0000 | 0.4983 | 1.0000 |  |
| Grade 3 | 0 | 0 | 0.00 | 0 | 0 | 0.00 | 1 | 1 | 0.66 | 1 | 1 | 0.22 | 1.0000 | 1.0000 | 1.0000 |  |
| Membranous glomerulonephritis | 0 | 0 | 0.00 | 0 | 0 | 0.00 | 1 | 1 | 0.66 | 1 | 1 | 0.22 | 1.0000 | 1.0000 | 1.0000 |  |
| Grade 1 | 0 | 0 | 0.00 | 0 | 0 | 0.00 | 0 | 0 | 0.00 | 0 | 0 | 0.00 | 1.0000 | 1.0000 | 1.0000 |  |
| Grade 2 | 0 | 0 | 0.00 | 0 | 0 | 0.00 | 0 | 0 | 0.00 | 0 | 0 | 0.00 | 1.0000 | 1.0000 | 1.0000 |  |
| Grade 3 | 0 | 0 | 0.00 | 0 | 0 | 0.00 | 1 | 1 | 0.66 | 1 | 1 | 0.22 | 1.0000 | 1.0000 | 1.0000 |  |
| Haematuria | 1 | 1 | 0.67 | 0 | 0 | 0.00 | 0 | 0 | 0.00 | 1 | 1 | 0.22 | 1.0000 | 0.4983 | 1.0000 |  |
| Grade 1 | 0 | 0 | 0.00 | 0 | 0 | 0.00 | 0 | 0 | 0.00 | 0 | 0 | 0.00 | 1.0000 | 1.0000 | 1.0000 |  |
| Grade 2 | 1 | 1 | 0.67 | 0 | 0 | 0.00 | 0 | 0 | 0.00 | 1 | 1 | 0.22 | 1.0000 | 0.4983 | 1.0000 |  |
| Grade 3 | 0 | 0 | 0.00 | 0 | 0 | 0.00 | 0 | 0 | 0.00 | 0 | 0 | 0.00 | 1.0000 | 1.0000 | 1.0000 |  |
| **Investigations** | 0 | 0 | 0.00 | 1 | 1 | 0.67 | 0 | 0 | 0.00 | 1 | 1 | 0.22 | 0.4983 | 1.0000 | 0.4967 |  |
| Grade 1 | 0 | 0 | 0.00 | 0 | 0 | 0.00 | 0 | 0 | 0.00 | 0 | 0 | 0.00 | 1.0000 | 1.0000 | 1.0000 |  |
| Grade 2 | 0 | 0 | 0.00 | 1 | 1 | 0.67 | 0 | 0 | 0.00 | 1 | 1 | 0.22 | 0.4983 | 1.0000 | 0.4967 |  |
| Grade 3 | 0 | 0 | 0.00 | 0 | 0 | 0.00 | 0 | 0 | 0.00 | 0 | 0 | 0.00 | 1.0000 | 1.0000 | 1.0000 |  |
| Grip strength decreased | 0 | 0 | 0.00 | 1 | 1 | 0.67 | 0 | 0 | 0.00 | 1 | 1 | 0.22 | 0.4983 | 1.0000 | 0.4967 |  |
| Grade 1 | 0 | 0 | 0.00 | 0 | 0 | 0.00 | 0 | 0 | 0.00 | 0 | 0 | 0.00 | 1.0000 | 1.0000 | 1.0000 |  |
| Grade 2 | 0 | 0 | 0.00 | 1 | 1 | 0.67 | 0 | 0 | 0.00 | 1 | 1 | 0.22 | 0.4983 | 1.0000 | 0.4967 |  |
| Grade 3 | 0 | 0 | 0.00 | 0 | 0 | 0.00 | 0 | 0 | 0.00 | 0 | 0 | 0.00 | 1.0000 | 1.0000 | 1.0000 |  |
| **Reproductive system and breast disorders** | 1 | 1 | 0.67 | 0 | 0 | 0.00 | 0 | 0 | 0.00 | 1 | 1 | 0.22 | 1.0000 | 0.4983 | 1.0000 |  |
| Grade 1 | 1 | 1 | 0.67 | 0 | 0 | 0.00 | 0 | 0 | 0.00 | 1 | 1 | 0.22 | 1.0000 | 0.4983 | 1.0000 |  |
| Grade 2 | 0 | 0 | 0.00 | 0 | 0 | 0.00 | 0 | 0 | 0.00 | 0 | 0 | 0.00 | 1.0000 | 1.0000 | 1.0000 |  |
| Grade 3 | 0 | 0 | 0.00 | 0 | 0 | 0.00 | 0 | 0 | 0.00 | 0 | 0 | 0.00 | 1.0000 | 1.0000 | 1.0000 |  |
| Menorrhagia | 1 | 1 | 0.67 | 0 | 0 | 0.00 | 0 | 0 | 0.00 | 1 | 1 | 0.22 | 1.0000 | 0.4983 | 1.0000 |  |
| Grade 1 | 1 | 1 | 0.67 | 0 | 0 | 0.00 | 0 | 0 | 0.00 | 1 | 1 | 0.22 | 1.0000 | 0.4983 | 1.0000 |  |
| Grade 2 | 0 | 0 | 0.00 | 0 | 0 | 0.00 | 0 | 0 | 0.00 | 0 | 0 | 0.00 | 1.0000 | 1.0000 | 1.0000 |  |
| Grade 3 | 0 | 0 | 0.00 | 0 | 0 | 0.00 | 0 | 0 | 0.00 | 0 | 0 | 0.00 | 1.0000 | 1.0000 | 1.0000 |  |
| **Hepatobiliary disorders** | 0 | 0 | 0.00 | 1 | 1 | 0.67 | 0 | 0 | 0.00 | 1 | 1 | 0.22 | 0.4983 | 1.0000 | 0.4967 |  |
| Grade 1 | 0 | 0 | 0.00 | 1 | 1 | 0.67 | 0 | 0 | 0.00 | 1 | 1 | 0.22 | 0.4983 | 1.0000 | 0.4967 |  |
| Grade 2 | 0 | 0 | 0.00 | 0 | 0 | 0.00 | 0 | 0 | 0.00 | 0 | 0 | 0.00 | 1.0000 | 1.0000 | 1.0000 |  |
| Grade 3 | 0 | 0 | 0.00 | 0 | 0 | 0.00 | 0 | 0 | 0.00 | 0 | 0 | 0.00 | 1.0000 | 1.0000 | 1.0000 |  |
| Hepatic failure | 0 | 0 | 0.00 | 1 | 1 | 0.67 | 0 | 0 | 0.00 | 1 | 1 | 0.22 | 0.4983 | 1.0000 | 0.4967 |  |
| Grade 1 | 0 | 0 | 0.00 | 1 | 1 | 0.67 | 0 | 0 | 0.00 | 1 | 1 | 0.22 | 0.4983 | 1.0000 | 0.4967 |  |
| Grade 2 | 0 | 0 | 0.00 | 0 | 0 | 0.00 | 0 | 0 | 0.00 | 0 | 0 | 0.00 | 1.0000 | 1.0000 | 1.0000 |  |
| Grade 3 | 0 | 0 | 0.00 | 0 | 0 | 0.00 | 0 | 0 | 0.00 | 0 | 0 | 0.00 | 1.0000 | 1.0000 | 1.0000 |  |
| **Neoplasms benign, malignant and unspecified (incl cysts and polyps)** | 0 | 0 | 0.00 | 1 | 1 | 0.67 | 0 | 0 | 0.00 | 1 | 1 | 0.22 | 0.4983 | 1.0000 | 0.4967 |  |
| Grade 1 | 0 | 0 | 0.00 | 0 | 0 | 0.00 | 0 | 0 | 0.00 | 0 | 0 | 0.00 | 1.0000 | 1.0000 | 1.0000 |  |
| Grade 2 | 0 | 0 | 0.00 | 0 | 0 | 0.00 | 0 | 0 | 0.00 | 0 | 0 | 0.00 | 1.0000 | 1.0000 | 1.0000 |  |
| Grade 3 | 0 | 0 | 0.00 | 1 | 1 | 0.67 | 0 | 0 | 0.00 | 1 | 1 | 0.22 | 0.4983 | 1.0000 | 0.4967 |  |
| Benign thyroid neoplasm | 0 | 0 | 0.00 | 1 | 1 | 0.67 | 0 | 0 | 0.00 | 1 | 1 | 0.22 | 0.4983 | 1.0000 | 0.4967 |  |
| Grade 1 | 0 | 0 | 0.00 | 0 | 0 | 0.00 | 0 | 0 | 0.00 | 0 | 0 | 0.00 | 1.0000 | 1.0000 | 1.0000 |  |
| Grade 2 | 0 | 0 | 0.00 | 0 | 0 | 0.00 | 0 | 0 | 0.00 | 0 | 0 | 0.00 | 1.0000 | 1.0000 | 1.0000 |  |
| Grade 3 | 0 | 0 | 0.00 | 1 | 1 | 0.67 | 0 | 0 | 0.00 | 1 | 1 | 0.22 | 0.4983 | 1.0000 | 0.4967 |  |
| **Vascular disorders** | 1 | 1 | 0.67 | 0 | 0 | 0.00 | 0 | 0 | 0.00 | 1 | 1 | 0.22 | 1.0000 | 0.4983 | 1.0000 |  |
| Grade 1 | 0 | 0 | 0.00 | 0 | 0 | 0.00 | 0 | 0 | 0.00 | 0 | 0 | 0.00 | 1.0000 | 1.0000 | 1.0000 |  |
| Grade 2 | 1 | 1 | 0.67 | 0 | 0 | 0.00 | 0 | 0 | 0.00 | 1 | 1 | 0.22 | 1.0000 | 0.4983 | 1.0000 |  |
| Grade 3 | 0 | 0 | 0.00 | 0 | 0 | 0.00 | 0 | 0 | 0.00 | 0 | 0 | 0.00 | 1.0000 | 1.0000 | 1.0000 |  |
| Aortic arteriosclerosis | 1 | 1 | 0.67 | 0 | 0 | 0.00 | 0 | 0 | 0.00 | 1 | 1 | 0.22 | 1.0000 | 0.4983 | 1.0000 |  |
| Grade 1 | 0 | 0 | 0.00 | 0 | 0 | 0.00 | 0 | 0 | 0.00 | 0 | 0 | 0.00 | 1.0000 | 1.0000 | 1.0000 |  |
| Grade 2 | 1 | 1 | 0.67 | 0 | 0 | 0.00 | 0 | 0 | 0.00 | 1 | 1 | 0.22 | 1.0000 | 0.4983 | 1.0000 |  |
| Grade 3 | 0 | 0 | 0.00 | 0 | 0 | 0.00 | 0 | 0 | 0.00 | 0 | 0 | 0.00 | 1.0000 | 1.0000 | 1.0000 |  |

[1] N = number of participants in each group. [2] *P*-values were calculated using Fisher's exact test. [3] nAE = number of adverse events. [4] n = number of participants who reported adverse events. [5] % = the percentage of participants who reported adverse events in each group.

Adverse events were coded according to MedDRA version 25.1.

# [Table S7. Changes in anti-Fc and anti-nuclear antibody levels 30 days after full vaccination](#eTable7)

| **30 days after vaccination** | **n (%)** | | | | | | | | |
| --- | --- | --- | --- | --- | --- | --- | --- | --- | --- |
| **50 μg dose (N=150)** | | | **100 μg dose (N=149)** | | | **Placebo (N=151)** | | |
| **Negative** | **Positive** | **Missing** | **Negative** | **Positive** | **Missing** | **Negative** | **Positive** | **Missing** |
| **Anti-Fc antibody** | | | | | | | | | |
| Negative | 147 (98.00) | 0 | 0 | 142 (95.30) | 0 | 0 | 146 (96.69) | 0 | 0 |
| Positive | 0 | 0 | 0 | 0 | 0 | 0 | 0 | 0 | 0 |
| Missing | 3 (2.00) | 0 | 0 | 7 (4.70) | 0 | 0 | 5 (3.31) | 0 | 0 |
| **Anti-nuclear antibody** | | | | | | | | | |
| Negative | 146 (97.99) | 1 (100.00) | 0 | 142 (95.30) | 0 | 0 | 145 (96.06) | 0 | 0 |
| Positive | 0 | 0 | 0 | 0 | 0 | 0 | 1 (0.66) | 0 | 0 |
| Missing | 3 (2.01) | 0 | 0 | 7 (4.70) | 0 | 0 | 5 (3.31) | 0 | 0 |

# [Table S8. Anti-gE antibody response at baseline characteristics, day 30 after first vaccination, day 30 after full vaccination](#eTable8) and month 6, 12, and 24 after full vaccination (FAS Set)

| **Endpoint** | **Time Point** | **50 μg** | **100 μg** | **Placebo** | ***P(50 μg)vs(100 μg)*** | ***P(50μg )vs(Placebo)*** | ***P(100 μg)vs(Placebo)*** |
| --- | --- | --- | --- | --- | --- | --- | --- |
| Sero-positive rate  (≥100 mIU/mL) (%)  (95% CI)b | Baselinea | 97.33  (93.31, 99.27) | 100.00  (97.57, 100.00) | 100.00  (97.57, 100.00) | 0.1225 | 0.1225 | 1.0000 |
| 30 days after first vaccination | 99.32  (96.29, 99.98) | 100.00  (97.51, 100.00) | 99.32  (96.29, 99.98) | 1.0000 | 1.0000 | 1.0000 |
| 30 days after full vaccination | 100.00  (97.52, 100.00) | 100.00  (97.47, 100.00) | 100.00  (97.49, 100.00) | 1.0000 | 1.0000 | 1.0000 |
| 6 months after full vaccination | 100.00  (97.47, 100.00) | 100.00  (97.34, 100.00) | 99.30  (96.14, 99.98) | 1.0000 | 1.0000 | 0.4965 |
| 12 months after full vaccination | 99.31  (96.19, 99.98) | 100.00  (97.32, 100.00) | 100.00  (97.42, 100.00) | 1.0000 | 1.0000 | 1.0000 |
| 24 months after full vaccination | 98.57  (94.93, 99.83) | 100.00  (97.24, 100.00) | 99.26  (95.94, 99.98) | 0.4986 | 1.0000 | 1.0000 |
| Sero-conversion rate (%)  (95% CI) | Baseline | / | / | / | / | / | / |
| 30 days after first vaccination | 77.03  (69.40, 83.54) | 83.56  (76.54, 89.17) | 1.35  (0.16, 4.80) | 0.1592 | <0.0001 | <0.0001 |
| 30 days after full vaccination | 95.24  (90.43, 98.06) | 96.53  (92.08, 98.8) | 2.07  (0.43, 5.93) | 0.5801 | <0.0001 | <0.0001 |
| 6 months after full vaccination | 92.36  (86.74, 96.13) | 92.70  (86.99, 96.44) | 4.23  (1.57, 8.97) | 0.9138 | <0.0001 | <0.0001 |
| 12 months after full vaccination | 78.47  (70.86, 84.88) | 82.35  (74.89, 88.35) | 3.55  (1.16, 8.08) | 0.4140 | <0.0001 | <0.0001 |
| **Endpoint** | **Time Point** | **50 μg** | **100 μg** | **Placebo** | ***P(50 μg)vs(100 μg)*** | ***P(50μg )vs(Placebo)*** | ***P(100 μg)vs(Placebo)*** |
|  | 24 months after full vaccination | 70.00  (61.68, 77.45) | 72.73  (64.29, 80.11) | 2.22  (0.46, 6.36) | 0.6190 | <0.0001 | <0.0001 |
| GMCc  (95% CI)d | Baseline | 0.92  (0.78, 1.08) | 1.12  (0.97, 1.30) | 1.18  (1.03, 1.35) | 0.0783 | 0.0221 | 0.6102 |
| 30 days after first vaccination | 6.88  (5.58, 8.47) | 13.61  (11.02, 16.82) | 1.21  (1.03, 1.41) | <0.0001 | <0.0001 | <0.0001 |
| 30 days after full vaccination | 16.03  (13.89, 18.50) | 24.19  (20.99, 27.88) | 1.21  (1.03, 1.42) | 0.0001 | <0.0001 | <0.0001 |
| 6 months after full vaccination | 9.85  (8.35, 11.61) | 13.43  (11.58, 15.58) | 1.28  (1.08, 1.52) | 0.0076 | <0.0001 | <0.0001 |
| 12 months after full vaccination | 6.05  (5.16, 7.09) | 7.80  (6.78, 8.98) | 1.27  (1.09, 1.49) | 0.0202 | <0.0001 | <0.0001 |
| 24 months after full vaccination | 4.55  (3.86, 5.36) | 5.98  (5.21, 6.85) | 1.21  (1.04, 1.41) | 0.0128 | <0.0001 | <0.0001 |
| GMFR | Baseline | / | / | / | / | / | / |
| 30 days after first vaccination | 7.50  (6.27,8.97) | 12.01  (9.68,14.91) | 1.02  (0.93,1.12) | 0.0001 | <0.0001 | <0.0001 |
| 30 days after full vaccination | 17.40  (14.73,20.56) | 21.32  (18.00,25.25) | 1.02  (0.93,1.12) | 0.0552 | <0.0001 | <0.0001 |
| 6 months after full vaccination | 10.64  (8.98, 12.62) | 11.85  (9.98, 14.07) | 1.06  (0.95, 1.18) | 0.3273 | <0.0001 | <0.0001 |
| 12 months after full vaccination | 6.60  (5.63, 7.74) | 6.93  (5.88, 8.17) | 1.04  (0.95, 1.15) | 0.6337 | <0.0001 | <0.0001 |
| 24 months after full vaccination | 4.90  (4.19, 5.72) | 5.28  (4.46, 6.25) | 0.97  (0.90, 1.05) | 0.4503 | <0.0001 | <0.0001 |
| **Endpoint** | **Time Point** | **50 μg** | **100 μg** | **Placebo** | ***P(50 μg)vs(100 μg)*** | ***P(50μg )vs(Placebo)*** | ***P(100 μg)vs(Placebo)*** |
| % ≥ 2-fold rise | Baseline | / | / | / | / | / | / |
| 30 days after first vaccination | 85.81  (79.13, 91.00) | 88.36  (82.01, 93.07) | 2.70  (0.74, 6.78) | 0.5154 | <0.0001 | <0.0001 |
| 30 days after full vaccination | 97.28  (93.18, 99.25) | 97.92  (94.03, 99.57) | 2.07  (0.43, 5.93) | 1.0000 | <0.0001 | <0.0001 |
| 6 months after full vaccination | 95.83 (91.15, 98.46) | 94.16  (88.82, 97.45) | 6.34  (2.94, 11.69) | 0.5195 | <0.0001 | <0.0001 |
| 12 months after full vaccination | 89.58 (83.40, 94.05) | 91.18  (85.09, 95.36) | 7.09  (3.45, 12.66) | 0.6517 | <0.0001 | <0.0001 |
| 24 months after full vaccination | 85.71 (78.80, 91.05) | 83.33  (75.86, 89.25) | 5.19  (2.11, 10.39) | 0.5870 | <0.0001 | <0.0001 |

a Baseline seroprevalence was calculated based on the FAS set.

b The 95% confidence intervals were calculated on the basis of the t-distribution of log-transformed values or difference in the log transformed values for geometric mean titer and factor change in geometric mean titre, respectively, then back-transformed to the original scale.

c GMC= geometric mean concentration (IU /mL).

d GMFR= fold rise in the geometric mean titre respect to before booster antibody titres.

# [Table S9. Anti-VZV antibody response at baseline characteristics, day 30 after first vaccination, day 30 after full vaccination](#eTable8) and month 6, 12, and 24 after full vaccination (FAS Set)

| **Endpoint** | **Time Point** | **50 μg** | **100 μg** | **Placebo** | ***P(50 μg)vs(100 μg)*** | ***P(50μg )vs(Placebo)*** | ***P(100 μg)vs(Placebo)*** |
| --- | --- | --- | --- | --- | --- | --- | --- |
| Sero-positive rate  (≥1:4)  (%)  (95% CI)b | Baselinea | 99.33  (96.34, 99.98) | 100.00  (97.57, 100.00) | 100.00  (97.57, 100.00) | 1.0000 | 1.0000 | 1.0000 |
| 30 days after first vaccination | 100.00  (97.54, 100.00) | 100.00  (97.51, 100.00) | 100.00  (97.54, 100.00) | 1.0000 | 1.0000 | 1.0000 |
| 30 days after full vaccination | 100.00  (97.52, 100.00) | 100.00  (97.47, 100.00) | 100.00  (97.49, 100.00) | 1.0000 | 1.0000 | 1.0000 |
| 6 months after full vaccination | 100.00  (97.47 100.00) | 100.00  (97.34, 100.00) | 100.00  (97.44, 100.00) | 1.0000 | 1.0000 | 1.0000 |
| 12 months after full vaccination | 100.00  (97.47, 100.00) | 100.00  (97.32, 100.00) | 100.00  (97.42, 100.00) | 1.0000 | 1.0000 | 1.0000 |
| 24 months after full vaccination | 100.00  (97.38, 100.00) | 100.00  (97.24, 100.00) | 100.00  (97.30, 100.00) | 1.0000 | 1.0000 | 1.0000 |
| Sero-conversion rate (%)  (95% CI) | Baseline | / | / | / | / | / | / |
| 30 days after first vaccination | 45.95  (37.73, 54.32) | 66.44  (58.16, 74.03) | 4.05  (1.50, 8.61) | 0.0004 | <0.0001 | <0.0001 |
| 30 days after full vaccination | 64.63  (56.32, 72.33) | 77.78  (70.10, 84.28) | 3.45  (1.13, 7.86) | 0.0133 | <0.0001 | <0.0001 |
| 6 months after full vaccination | 77.08  (69.35, 83.67) | 78.83  (71.03, 85.34) | 26.76  (19.68, 34.83) | 0.7238 | <0.0001 | <0.0001 |
| 12 months after full vaccination | 55.94  (47.41, 64.23) | 53.68  (44.93, 62.26) | 15.60  (10.04, 22.66) | 0.6653 | <0.0001 | <0.0001 |

| **Endpoint** | **Time Point** | **50 μg** | **100 μg** | **Placebo** | ***P(50 μg)vs(100 μg)*** | ***P(50μg )vs(Placebo)*** | ***P(100 μg)vs(Placebo)*** |
| --- | --- | --- | --- | --- | --- | --- | --- |
|  | 24 months after full vaccination | 41.01  (32.74, 49.66) | 40.15  (31.72, 49.04) | 8.89  (4.68, 15.01) | 0.8860 | <0.0001 | <0.0001 |
| GMTc  (95% CI)d | Baseline | 48.28  (43.38, 53.73) | 53.20  (47.86, 59.14) | 54.95  (49.54, 60.94) | 0.1893 | 0.0808 | 0.6662 |
| 30 days after first vaccination | 131.65  (114.79, 150.98) | 194.38  (167.55, 225.51) | 73.65  (65.59, 82.71) | 0.0002 | <0.0001 | <0.0001 |
| 30 days after full vaccination | 184.90  (158.54, 215.65) | 264.77  (225.00, 311.58) | 72.82  (64.59, 82.09) | 0.0017 | <0.0001 | <0.0001 |
| 6 months after full vaccination | 324.10  (273.19, 384.49) | 381.79  (325.38, 447.98) | 93.20  (81.87, 106.10) | 0.1399 | <0.0001 | <0.0001 |
| 12 months after full vaccination | 147.89  (129.22, 169.25) | 180.10  (155.76, 208.24) | 64.95  (57.17, 73.78) | 0.0436 | <0.0001 | <0.0001 |
| 24 months after full vaccination | 106.97  (90.84, 125.95) | 128.00  (108.19, 151.44) | 47.27  (40.65, 54.97) | 0.1195 | <0.0001 | <0.0001 |
| GMFR | Baseline | / | / | / | / | / | / |
| 30 days after first vaccination | 2.72  (2.37, 3.13) | 3.64  (3.16, 4.18) | 1.34  (1.24,1.44) | 0.0005 | <0.0001 | <0.0001 |
| 30 days after full vaccination | 3.83  (3.30, 4.46) | 4.94  (4.27, 5.73) | 1.33  (1.23,1.43) | 0.0036 | <0.0001 | <0.0001 |
| 6 months after full vaccination | 6.60  (5.48, 7.95) | 6.91  (5.69, 8.38) | 1.73  (1.49, 2.00) | 0.7377 | <0.0001 | <0.0001 |
| 12 months after full vaccination | 3.04  (2.62, 3.53) | 3.36  (2.80, 4.04) | 1.19  (1.05, 1.36) | 0.3569 | <0.0001 | <0.0001 |
| 24 months after full vaccination | 2.18  (1.82, 2.61) | 2.35  (1.90, 2.91) | 0.86  (0.71, 1.03) | 0.5716 | <0.0001 | <0.0001 |
| **Endpoint** | **Time Point** | **50 μg** | **100 μg** | **Placebo** | ***P(50 μg)vs(100 μg)*** | ***P(50μg )vs(Placebo)*** | ***P(100 μg)vs(Placebo)*** |
| % ≥ 2-fold rise | Baseline | / | / | / | / | / | / |
| 30 days after first vaccination | 2.71 | 3.64 | 1.34 | 0.0185 | <0.0001 | <0.0001 |
| 30 days after full vaccination | 82.99  (75.93, 88.68) | 90.97  (85.06, 95.11) | 35.86  (28.07, 44.24) | 0.0434 | <0.0001 | <0.0001 |
| 6 months after full vaccination | 93.75  (88.47, 97.10) | 90.51  (84.32, 94.85) | 57.04  (48.47, 65.31) | 0.3124 | <0.0001 | <0.0001 |
| 12 months after full vaccination | 80.56  (73.14, 86.67) | 78.68  (70.83, 85.23) | 36.88  (28.92, 45.41) | 0.6963 | <0.0001 | <0.0001 |
| 24 months after full vaccination | 68.35  (59.92, 75.97) | 71.21  (62.69, 78.76) | 28.15  (20.75, 36.53) | 0.6076 | <0.0001 | <0.0001 |

a Baseline seroprevalence was calculated based on the FAS set.

b The 95% confidence intervals were calculated on the basis of the t-distribution of log-transformed values or difference in the log transformed values for geometric mean titer and factor change in geometric mean titre, respectively, then back-transformed to the original scale.

c GMT= geometric mean titre.

d GMFR= fold rise in the geometric mean titre respect to before booster antibody titres.

**[Table S10. Seropositivity and seroconversion rates of anti-gE and anti-VZV antibodies in different analysis sets](#eTable9)**

| **Time points** | **Analysis set** | **50 μg dose (1)** | | | **100 μg dose (2)** | | | **Placebo (3)** | | | ***P*(1)VS(2)** | ***P*(1)VS(3)** | ***P*(2)VS(3)** |
| --- | --- | --- | --- | --- | --- | --- | --- | --- | --- | --- | --- | --- | --- |
| **N** | **n** | **% (95% CI)** | **N** | **n** | **% (95% CI)** | **N** | **n** | **% (95% CI)** |
| **Anti-gE antibody seropositivity rate** | | | | | | | | | | | | | |
| 30 days post-first vaccination | FAS | 148 | 147 | 99.32 (96.29, 99.98) | 146 | 146 | 100.00 (97.51, 100.00) | 148 | 147 | 99.32 (96.29, 99.98) | 1.0000 | 1.0000 | 1.0000 |
| PPS1 | 147 | 146 | 99.32 (96.27, 99.98) | 142 | 142 | 100.00 (97.44, 100.00) | 145 | 144 | 99.31 (96.22, 99.98) | 1.0000 | 1.0000 | 1.0000 |
| 30 days post-full vaccination | FAS | 147 | 147 | 100.00 (97.52, 100.00) | 144 | 144 | 100.00 (97.47, 100.00) | 145 | 145 | 100.00 (97.49, 100.00) | 1.0000 | 1.0000 | 1.0000 |
| PPS2 | 146 | 146 | 100.00 (97.51, 100.00) | 140 | 140 | 100.00 (97.40, 100.00) | 143 | 143 | 100.00 (97.45, 100.00) | 1.0000 | 1.0000 | 1.0000 |
| 6 months post-full vaccination | FAS | 144 | 144 | 100.00 (97.47, 100.00) | 137 | 137 | 100.00 (97.34, 100.00) | 142 | 141 | 99.30 (96.14, 99.98) | 1.0000 | 1.0000 | 0.4965 |
| 12 months post-full vaccination | FAS | 144 | 143 | 99.31 (96.19, 99.98) | 136 | 136 | 100.00 (97.32, 100.00) | 141 | 141 | 100.00 (97.42, 100.00) | 1.0000 | 1.0000 | 1.0000 |
| 24 months post-full vaccination | FAS | 140 | 138 | 98.57 (94.93, 99.83) | 132 | 132 | 100.00 (97.24, 100.00) | 135 | 134 | 99.26 (95.94, 99.98) | 0.4986 | 1.0000 | 1.0000 |
| **Anti-gE antibody seroconversion rate** | | | | | | | | | | | | | |
| 30 days post-first vaccination | FAS | 148 | 114 | 77.03 (69.40, 83.54) | 146 | 122 | 83.56 (76.54, 89.17) | 148 | 2 | 1.35 (0.16, 4.80) | 0.1592 | <0.0001 | <0.0001 |
| PPS1 | 147 | 113 | 76.87 (69.21, 83.42) | 142 | 120 | 84.51 (77.49, 90.03) | 145 | 2 | 1.38(0.17, 4.89) | 0.1006 | <0.0001 | <0.0001 |
| 30 days post-full vaccination | FAS | 147 | 140 | 95.24 (90.43, 98.06) | 144 | 139 | 96.53 (92.08, 98.8) | 145 | 3 | 2.07 (0.43, 5.93) | 0.5801 | <0.0001 | <0.0001 |
| PPS2 | 146 | 139 | 95.21 (90.37, 98.05) | 140 | 136 | 97.14 (92.85, 99.22) | 143 | 2 | 1.40 (0.17, 4.96) | 0.3944 | <0.0001 | <0.0001 |
| 6 months post-full vaccination | FAS | 144 | 133 | 92.36 (86.74, 96.13) | 137 | 127 | 92.70 (86.99, 96.44) | 142 | 6 | 4.23 (1.57, 8.97) | 0.9138 | <0.0001 | <0.0001 |
| 12 months post-full vaccination | FAS | 144 | 113 | 78.47 (70.86, 84.88) | 136 | 112 | 82.35 (74.89, 88.35) | 141 | 5 | 3.55 (1.16, 8.08) | 0.4140 | <0.0001 | <0.0001 |
| 24 months post-full vaccination | FAS | 140 | 98 | 70.00 (61.68, 77.45) | 132 | 96 | 72.73 (64.29, 80.11) | 135 | 3 | 2.22 (0.46, 6.36) | 0.6191 | <0.0001 | <0.0001 |
| **Anti-VZV antibody seropositivity rate** | | | | | | | | | | | | | |
| 30 days post-first vaccination | FAS | 148 | 148 | 100.00 (97.54, 100.00) | 146 | 146 | 100.00 (97.51, 100.00) | 148 | 148 | 100.00 (97.54, 100.00) | 1.0000 | 1.0000 | 1.0000 |
| PPS1 | 147 | 147 | 100.00 (97.52, 100.00) | 142 | 142 | 100.00 (97.44, 100.00) | 145 | 145 | 100.00 (97.49, 100.00) | 1.0000 | 1.0000 | 1.0000 |
| 30 days post-full vaccination | FAS | 147 | 147 | 100.00 (97.52, 100.00) | 144 | 144 | 100.00 (97.47, 100.00) | 145 | 145 | 100.00 (97.49, 100.00) | 1.0000 | 1.0000 | 1.0000 |
| PPS2 | 146 | 146 | 100.00 (97.51, 100.00) | 140 | 140 | 100.00 (97.40, 100.00) | 143 | 143 | 100.00 (97.45, 100.00) | 1.0000 | 1.0000 | 1.0000 |
| 6 months post-full vaccination | FAS | 144 | 144 | 100.00 (97.47, 100.00) | 137 | 137 | 100.00 (97.34, 100.00) | 142 | 142 | 100.00 (97.44, 100.00) | 1.0000 | 1.0000 | 1.0000 |
| 12 months post-full vaccination | FAS | 144 | 144 | 100.00 (97.47, 100.00) | 136 | 136 | 100.00 (97.32, 100.00) | 141 | 141 | 100.00 (97.42, 100.00) | 1.0000 | 1.0000 | 1.0000 |
| 24 months post-full vaccination | FAS | 139 | 139 | 100.00 (97.38, 100.00) | 132 | 132 | 100.00 (97.24, 100.00) | 135 | 135 | 100.00 (97.30, 100.00) | 1.0000 | 1.0000 | 1.0000 |
| **Anti-VZV antibody seroconversion rate** | | | | | | | | | | | | | |
| 30 days post-first vaccination | FAS | 148 | 68 | 45.95 (37.73, 54.32) | 146 | 97 | 66.44 (58.16, 74.03) | 148 | 6 | 4.05 (1.50, 8.61) | 0.0004 | <0.0001 | <0.0001 |
| PPS1 | 147 | 67 | 45.58 (37.35, 53.99) | 142 | 95 | 66.90 (58.52, 74.56) | 145 | 6 | 4.14 (1.53, 8.79) | 0.0003 | <0.0001 | <0.0001 |
| 30 days post-full vaccination | FAS | 147 | 95 | 64.63 (56.32, 72.33) | 144 | 112 | 77.78 (70.10, 84.28) | 145 | 5 | 3.45 (1.13, 7.86) | 0.0133 | <0.0001 | <0.0001 |
| PPS2 | 146 | 94 | 64.38 (56.04, 72.13) | 140 | 110 | 78.57 (70.84, 85.05) | 143 | 4 | 2.80 (0.77, 7.01) | 0.0080 | <0.0001 | <0.0001 |
| 6 months post-full vaccination | FAS | 144 | 111 | 77.08 (69.35, 83.67) | 137 | 108 | 78.83 (71.03, 85.34) | 142 | 38 | 26.76 (19.68, 34.83) | 0.7238 | <0.0001 | <0.0001 |
| 12 months post-full vaccination | FAS | 144 | 81 | 56.25 (47.74, 64.49) | 136 | 73 | 53.68 (44.93, 62.26) | 141 | 22 | 15.60 (10.04, 22.66) | 0.6653 | <0.0001 | <0.0001 |
| 24 months post-full vaccination | FAS | 139 | 57 | 41.01 (32.74, 49.66) | 132 | 53 | 40.15 (31.72, 49.04) | 135 | 12 | 8.89 (4.68, 15.01) | 0.8860 | <0.0001 | <0.0001 |

**[Table S11. GMC or GMT, and GMFR of anti-gE and anti-VZV antibodies in different analysis sets](#eTable10)**

| **Time points** | **Analysis set** | **50 μg dose (1)** | | | **100 μg dose (2)** | | | **Placebo (3)** | | | | ***P*(1)VS(2)** | ***P*(1)VS(3)** | ***P*(2)VS(3)** |
| --- | --- | --- | --- | --- | --- | --- | --- | --- | --- | --- | --- | --- | --- | --- |
| **N** | **GMC or GMT (95%CI)** | **GMFR** | **N** | **GMC or GMT (95%CI)** | **GMFR** | **N** | **GMC or GMT(95%CI)** | | **GMFR** |
| **Anti-gE Antibody GMC and GMFR** | | | | | | | | | | | | | | |
| 30 days post-first vaccination | FAS | 148 | 6.88 (5.58, 8.47) | 7.50 | 146 | 13.61 (11.02, 16.82) | 12.01 | 148 | 1.21 (1.03, 1.41) | 1.02 | | <0.0001 | <0.0001 | <0.0001 |
| PPS1 | 147 | 6.88 (5.57, 8.49) | 7.46 | 142 | 13.96 (11.30, 17.26) | 12.34 | 145 | 1.23 (1.05, 1.44) | 1.03 | | <0.0001 | <0.0001 | <0.0001 |
| 30 days post-full vaccination | FAS | 147 | 16.03 (13.89, 18.50) | 17.40 | 144 | 24.19 (20.99, 27.88) | 21.32 | 145 | 1.21 (1.03, 1.42) | 1.02 | | <0.0001 | <0.0001 | <0.0001 |
| PPS2 | 146 | 15.95 (13.81, 18.42) | 17.24 | 140 | 24.84 (21.71, 28.42) | 21.92 | 143 | 1.19 (1.02, 1.39) | 0.99 | | <0.0001 | <0.0001 | <0.0001 |
| 6 months post-full vaccination | FAS | 144 | 9.85 (8.35, 11.61) | 10.64 | 137 | 13.43 (11.58, 15.58) | 11.85 | 142 | 1.28 (1.08, 1.52) | 1.06 | | 0.0076 | <0.0001 | <0.0001 |
| 12 months post-full vaccination | FAS | 144 | 6.05 (5.16, 7.09) | 6.60 | 136 | 7.80 (6.78, 8.98) | 6.93 | 141 | 1.27 (1.09, 1.49) | 1.04 | | 0.0202 | <0.0001 | <0.0001 |
| 24 months post-full vaccination | FAS | 140 | 4.55 (3.86, 5.36) | 4.90 | 132 | 5.98 (5.21, 6.85) | 5.28 | 135 | 1.21 (1.04, 1.41) | 0.97 | | 0.0128 | <0.0001 | <0.0001 |
| **Anti-VZV Antibody GMT and GMFR** | | | | | | | | | | | | | | |
| 30 days post-first vaccination | FAS | 148 | 131.65 (114.79, 150.98) | 2.71 | 146 | 194.38 (167.55, 225.51) | 3.64 | 148 | 73.65 (65.59, 82.71) | 1.34 | | 0.0002 | <0.0001 | <0.0001 |
| PPS1 | 147 | 131.05 (114.20, 150.40) | 2.70 | 142 | 195.72 (168.37, 227.53) | 3.70 | 145 | 73.87 (65.78, 82.96) | 1.35 | | 0.0001 | <0.0001 | <0.0001 |
| 30 days post-full vaccination | FAS | 147 | 184.90 (158.54, 215.65) | 3.82 | 144 | 264.77 (225.00, 311.58) | 4.94 | 145 | 72.82 (64.59, 82.09) | 1.33 | | 0.0017 | <0.0001 | <0.0001 |
| PPS2 | 146 | 184.49 (158.03, 215.38) | 3.81 | 140 | 265.03 (224.55, 312.81) | 5.00 | 143 | 71.90 (64.06, 80.69) | 1.32 | | 0.0017 | <0.0001 | <0.0001 |
| 6 months post-full vaccination | FAS | 144 | 324.10 (273.19, 384.49) | 6.60 | 137 | 381.79 (325.38, 447.98) | 6.91 | 142 | 93.20 (81.87, 106.10) | 1.73 | | 0.1399 | <0.0001 | <0.0001 |
| 12 months post-full vaccination | FAS | 144 | 147.89 (129.22, 169.25) | 3.04 | 136 | 180.10 (155.76, 208.24) | 3.36 | 141 | 64.95 (57.17, 73.78) | 1.19 | | 0.0436 | <0.0001 | <0.0001 |
| 24 months post-full vaccination | FAS | 139 | 106.97 (90.84, 125.95) | 2.18 | 132 | 128.00 (108.19, 151.44) | 2.35 | 135 | 47.27 (40.65, 54.97) | 0.86 | | 0.1195 | <0.0001 | <0.0001 |

# CONSORT2025 checklist of information to include when reporting a randomized trial*

| **Section / Topic** | **No** | **CONSORT 2025 checklist item description** | **Reported on page no.** |
| --- | --- | --- | --- |
| **Title and abstract** | | |  |
| Title and structured abstract | 1a | Identification as a randomised trial | Page 1 |
| 1b | Structured summary of the trial design, methods, results, and conclusions | Page 2-3 |
| **Open science** | | |  |
| Trial registration | 2 | Name of trial registry, identifying number (with URL) and date of registration | Page 2 |
| Protocol and statistical analysis plan | 3 | Where the trial protocol and statistical analysis plan can be accessed | Page 21 |
| Data sharing | 4 | Where and how the individual de-identified participant data (including data dictionary), statistical code and any other materials can be accessed | NA |
| Funding and conflicts of interest | 5a | Sources of funding and other support (e.g., supply of drugs), and role of funders in the design, conduct, analysis and reporting of the trial | Page 18-19 |
| 5b | Financial and other conflicts of interest of the manuscript authors | Page 18 |
| **Introduction** | | |  |
| Background and rationale | 6 | Scientific background and rationale | Page 4 |
| Objectives | 7 | Specific objectives related to benefits and harms | Page 4 |
| **Methods** | | |  |
| Patient and public involvement | 8 | Details of patient or public involvement in the design, conduct and reporting of the trial | NA |
| Trial design | 9 | Description of trial design including type of trial (e.g., parallel group, crossover), allocation ratio, and framework (e.g., superiority, equivalence, non-inferiority, exploratory) | Page 5 |
| Changes to trial protocol | 10 | Important changes to the trial after it commenced including any outcomes or analyses that were not prespecified, with reason | NA |
| Trial setting | 11 | Settings (e.g., community, hospital) and locations (e.g., countries, sites) where the trial was conducted | Page 5 |
| Eligibility criteria | 12a | Eligibility criteria for participants | Page 5, Additional file: Methods P1-2 |
| 12b | If applicable, eligibility criteria for sites and for individuals delivering the interventions (e.g., surgeons, physiotherapists) | NA |
| Intervention and comparator | 13 | Intervention and comparator with sufficient details to allow replication. If relevant, where additional materials describing the intervention and comparator (e.g., intervention manual) can be accessed | Page 6, protocol |
| Outcomes | 14 | Pre-specified primary and secondary outcomes, including the specific measurement variable (e.g., systolic blood pressure), analysis metric (e.g., change from baseline, final value, time to event), method of aggregation (e.g., median, proportion), and time point for each outcome | Page 8-9, Additional file: Methods P7 |
| Harms | 15 | How harms were defined and assessed (e.g., systematically, non-systematically) | Additional file: Methods P7 |
| Sample size | 16a | How sample size was determined, including all assumptions supporting the sample size calculation | Additional file: Methods P6, Protocol P37-42 |
| 16b | Explanation of any interim analyses and stopping guidelines | Protocol P32-33, 47 |
| Randomisation: |  |  |  |
| Sequence generation | 17a | Who generated the random allocation sequence and the method used | Page 5 |
| 17b | Type of randomisation and details of any restriction (e.g., stratification, blocking and block size) | Page 5, SAP P3 |
| Allocation concealment mechanism | 18 | Mechanism used to implement the random allocation sequence (e.g., central computer/telephone; sequentially numbered, opaque, sealed containers), describing any steps to conceal the sequence until interventions were assigned | Protocol P30-31 |
| Implementation | 19 | Whether the personnel who enrolled and those who assigned participants to the interventions had access to the random allocation sequence | Page 6, Protocol P30-31 |
| Blinding | 20a | Who was blinded after assignment to interventions (e.g., participants, care providers, outcome assessors, data analysts) | Page 6, Protocol P30-31 |
| 20b | If blinded, how blinding was achieved and description of the similarity of interventions | Protocol P30-31 |
| Statistical methods | 21a | Statistical methods used to compare groups for primary and secondary outcomes, including harms | Page 9-10 |
| 21b | Definition of who is included in each analysis (e.g., all randomised participants), and in which group | Additional file: Methods P6 |
| 21c | How missing data were handled in the analysis | Page 10 |
| 21d | Methods for any additional analyses (e.g., subgroup and sensitivity analyses), distinguishing prespecified from post-hoc | NA |
| **Results** | | |  |
| Participant flow, including flow diagram | 22a | For each group, the numbers of participants who were randomly assigned, received intended intervention, and were analysed for the primary outcome | Page 10 |
| 22b | For each group, losses and exclusions after randomisation, together with reasons | Page 23 |
| Recruitment | 23a | Dates defining the periods of recruitment and follow-up for outcomes of benefits and harms | Page 10 |
| 23b | If relevant, why the trial ended or was stopped | NA |
| Intervention and comparator delivery | 24a | Intervention and comparator as they were actually administered (e.g., where appropriate, who delivered the intervention/comparator, how participants adhered, whether they were delivered as intended [fidelity]) | Page 10, Additional file: Table S2 |
| 24b | Concomitant care received during the trial for each group | NA |
| Baseline data | 25 | A table showing baseline demographic and clinical characteristics for each group | Page 26 |
| Numbers analysed,  outcomes and estimation | 26 | For each primary and secondary outcome, by group:   - the number of participants included in the analysis - the number of participants with available data at the outcome time point - result for each group, and the estimated effect size and its precision (such as 95% confidence interval) - for binary outcomes, presentation of both absolute and relative effect size | Page 10, Additional file: Table S1 |
| Harms | 27 | All harms or unintended events in each group | Page 11-12 |
| Ancillary analyses | 28 | Any other analyses performed, including subgroup and sensitivity analyses, distinguishing pre-specified from post-hoc | NA |
| **Discussion** | | |  |
| Interpretation | 29 | Interpretation consistent with results, balancing benefits and harms, and considering other relevant evidence | Page 13-16 |
| Limitations | 30 | Trial limitations, addressing sources of potential bias, imprecision, generalisability, and, if relevant, multiplicity of analyses | Page 16 |

*We strongly recommend reading this statement in conjunction with the CONSORT 2025 Explanation and Elaboration and/or the CONSORT 2025 Expanded Checklist for important clarifications on all the items. We also recommend reading relevant CONSORT extensions. See [www.consort-spirit.org](http://www.consort-spirit.org).

Citation: Hopewell S, Chan AW, Collins GS, Hróbjartsson A, Moher D, Schulz KF, et al. CONSORT 2025 Statement: updated guideline for reporting randomised trials. BMJ. 2025; 388:e081123. <https://dx.doi.org/10.1136/bmj-2024-081123>.
© 2025 Hopewell et al. This is an Open Access article distributed under the terms of the Creative Commons Attribution License (<https://creativecommons.org/licenses/by/4.0/>), which permits unrestricted use, distribution, and reproduction in any medium, provided the original work is properly cited.
